# Supplementary material for: DFT investigations of phenyldithiafulvene dimers at different oxidation states
Source: Royal Society of Chemistry journal article supplement (doi:10.1039/d3cp04122k), 2023-01-01
Supplement: d3cp04122k1.pdf [file d3cp04122k1.pdf]

*Supporting information for*

## **DFT Investigations of Phenylthiafulvene Dimers at Different Oxidation States**

*Liam Britt, Ramin Eradeh, Chris Leung and Yuming Zhao\**

Department of Chemistry, Memorial University of Newfoundland

Core Science Facility, 45 Arctic Avenue, St. John's, NL, Canada A1C 5S7

Email: yuming@mun.ca; Tel: + 1 709 864 8747; Fax: +1 709 864 3702

### **Table of Content**

|                                                                                          |     |
|------------------------------------------------------------------------------------------|-----|
| 1. Optimized geometries and energies of Ph-DTF dimers in the gas phase                   | S2  |
| 2. Optimized geometries and energies of Ph-DTF dimers in CH <sub>2</sub> Cl <sub>2</sub> | S29 |
| 3. Results of Intrinsic Reaction Coordinate (IRC) Analysis                               | S56 |
| 4. Results of QTAIM Analysis of $\pi$ -MV-dimers                                         | S60 |
| 5. Results of Spin Density Analysis                                                      | S63 |

# 1. Optimized geometries and energies of Ph-DTF dimers in the gas phase

$\pi$ -1

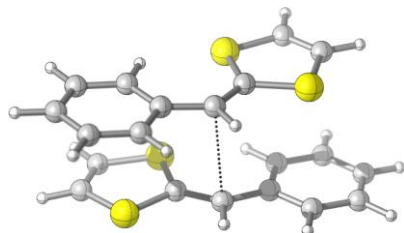

#p m062x/def2svp opt freq empiricaldispersion=gd3  
nosymm geom=connectivity

Charge = 1, Multiplicity = 2, Point group = C1

Electronic Energy = -2362.797651 Hartree

$S^2$  = 0.7603

Number of imaginary frequencies = 0

Sum of electronic and zero-point Energies = -2362.495494 Hartree

Sum of electronic and thermal Energies = -2362.473716 Hartree

Sum of electronic and thermal Enthalpies = -2362.472772 Hartree

Sum of electronic and thermal Free Energies = -2362.547946 Hartree

| Cartesian Coordinates |           |           |           | Cartesian Coordinates |           |           |           |
|-----------------------|-----------|-----------|-----------|-----------------------|-----------|-----------|-----------|
| Atoms                 | X         | Y         | Z         | Atoms                 | X         | Y         | Z         |
| C                     | -2.352929 | 1.322251  | -0.466517 | C                     | -3.729748 | 1.190477  | -0.607338 |
| C                     | -4.556058 | 1.099252  | 0.515668  | C                     | -3.993146 | 1.141455  | 1.791749  |
| C                     | -2.617630 | 1.270960  | 1.938284  | C                     | -1.764797 | 1.368040  | 0.815231  |
| C                     | 0.716242  | 1.684832  | 0.231179  | C                     | 3.117283  | 2.142303  | -0.620094 |
| C                     | 2.370096  | 2.019453  | -1.731687 | S                     | 2.311518  | 1.944779  | 0.894217  |
| S                     | 0.686846  | 1.663910  | -1.512642 | C                     | -0.348366 | 1.512659  | 1.081970  |
| H                     | -1.752562 | 1.408006  | -1.370482 | H                     | -4.166248 | 1.171851  | -1.607038 |
| H                     | -5.636478 | 1.009653  | 0.394923  | H                     | -4.629038 | 1.080130  | 2.675554  |
| H                     | -2.182784 | 1.311122  | 2.939334  | H                     | 4.185093  | 2.361055  | -0.608487 |
| H                     | 2.740729  | 2.124080  | -2.751162 | H                     | -0.089206 | 1.556392  | 2.144420  |
| C                     | 2.617670  | -1.272815 | 1.937189  | C                     | 3.993182  | -1.143159 | 1.790741  |
| C                     | 4.556067  | -1.099781 | 0.514688  | C                     | 3.729733  | -1.189967 | -0.608385 |
| C                     | 2.352918  | -1.321862 | -0.467653 | C                     | 1.764815  | -1.368852 | 0.814063  |
| C                     | -0.716222 | -1.685121 | 0.229741  | C                     | -2.370134 | -2.017714 | -1.733421 |
| C                     | -3.117307 | -2.141610 | -0.621933 | S                     | -0.686839 | -1.662583 | -1.514060 |
| S                     | -2.311492 | -1.945661 | 0.892554  | C                     | 0.348389  | -1.513724 | 1.080683  |
| H                     | 2.182850  | -1.313907 | 2.938212  | H                     | 4.629092  | -1.082642 | 2.674588  |
| H                     | 5.636484  | -1.010067 | 0.394005  | H                     | 4.166208  | -1.170404 | -1.608077 |
| H                     | 1.752521  | -1.406723 | -1.371684 | H                     | -2.740799 | -2.121299 | -2.752991 |
| H                     | -4.185134 | -2.360285 | -0.610519 | H                     | 0.089232  | -1.558437 | 2.143093  |

### TS-1

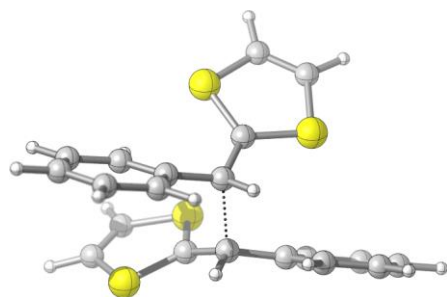

```
#p m062x/def2svp opt=(calcfc,ts,noeigen) freq
empiricaldispersion=gd3 nosymm geom=connectivity
```

Charge = 1, Multiplicity = 2, Point group = C1

Electronic Energy = -2362.777498 Hartree

$\hat{S}^2 = 0.7657$

Number of imaginary frequencies = 1,  $\nu_i = -318.02$

Sum of electronic and zero-point Energies = -2362.474707 Hartree

Sum of electronic and thermal Energies = -2362.453870 Hartree

Sum of electronic and thermal Enthalpies = -2362.452926 Hartree

Sum of electronic and thermal Free Energies = -2362.527298 Hartree

| Cartesian Coordinates |           |           |           | Cartesian Coordinates |           |           |           |
|-----------------------|-----------|-----------|-----------|-----------------------|-----------|-----------|-----------|
| Atoms                 | X         | Y         | Z         | Atoms                 | X         | Y         | Z         |
| C                     | -2.557132 | 0.701540  | 0.075296  | C                     | -3.929238 | 0.742570  | 0.314050  |
| C                     | -4.411998 | 0.860510  | 1.616235  | C                     | -3.515114 | 0.929294  | 2.682249  |
| C                     | -2.144040 | 0.893848  | 2.443792  | C                     | -1.644403 | 0.794837  | 1.137218  |
| C                     | 0.468283  | 1.520659  | -0.068763 | C                     | 2.231341  | 2.827449  | -1.414187 |
| C                     | 1.057881  | 3.103153  | -2.010785 | S                     | 2.183120  | 1.766331  | -0.048077 |
| S                     | -0.357568 | 2.379837  | -1.327343 | C                     | -0.169617 | 0.741414  | 0.946414  |
| H                     | -2.206190 | 0.565165  | -0.950529 | H                     | -4.624772 | 0.676303  | -0.523698 |
| H                     | -5.486139 | 0.895126  | 1.801332  | H                     | -3.884309 | 1.017108  | 3.704575  |
| H                     | -1.447870 | 0.958517  | 3.283485  | H                     | 3.199439  | 3.217995  | -1.727623 |
| H                     | 0.933182  | 3.752415  | -2.877371 | H                     | 0.369586  | 0.822579  | 1.895009  |
| C                     | 2.362419  | -0.815746 | 2.125047  | C                     | 3.742607  | -0.757256 | 2.279786  |
| C                     | 4.578740  | -1.083295 | 1.210185  | C                     | 4.020519  | -1.492510 | 0.001951  |
| C                     | 2.635252  | -1.547519 | -0.154538 | C                     | 1.785622  | -1.187122 | 0.898521  |
| C                     | -0.431626 | -1.668651 | -0.308727 | C                     | -1.548337 | -1.916822 | -2.609368 |
| C                     | -2.409209 | -2.468853 | -1.734672 | S                     | -0.063281 | -1.294607 | -1.955003 |
| S                     | -1.925545 | -2.491140 | -0.074317 | C                     | 0.295538  | -1.157962 | 0.802860  |
| H                     | 1.719293  | -0.577411 | 2.976729  | H                     | 4.168521  | -0.466351 | 3.240664  |
| H                     | 5.662007  | -1.039369 | 1.327876  | H                     | 4.665264  | -1.780432 | -0.829217 |
| H                     | 2.236755  | -1.899526 | -1.105566 | H                     | -1.698236 | -1.863701 | -3.687570 |
| H                     | -3.363694 | -2.922199 | -2.002450 | H                     | -0.175546 | -1.451003 | 1.749266  |

**σ-1**

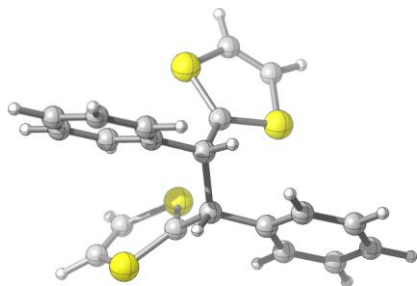

#p m062x/def2svp opt freq empiricaldispersion=gd3  
nosymm geom=connectivity

Charge = 1, Multiplicity = 2, Point group = C1

Electronic Energy = -2362.784206 Hartree

$\hat{S}^2 = 0.7592$

Number of imaginary frequencies = 0

Sum of electronic and zero-point Energies = -2362.479856 Hartree

Sum of electronic and thermal Energies = -2362.458918 Hartree

Sum of electronic and thermal Enthalpies = -2362.457974 Hartree

Sum of electronic and thermal Free Energies = -2362.531983 Hartree

| Cartesian Coordinates |           |           |           | Cartesian Coordinates |           |           |           |
|-----------------------|-----------|-----------|-----------|-----------------------|-----------|-----------|-----------|
| Atoms                 | X         | Y         | Z         | Atoms                 | X         | Y         | Z         |
| C                     | -2.645853 | 0.241222  | 0.123014  | C                     | -4.012659 | 0.215148  | 0.391805  |
| C                     | -4.484875 | 0.536587  | 1.663919  | C                     | -3.584074 | 0.888553  | 2.667009  |
| C                     | -2.217000 | 0.917875  | 2.396956  | C                     | -1.731431 | 0.596040  | 1.125218  |
| C                     | 0.218296  | 1.476523  | -0.223689 | C                     | 1.625543  | 2.928338  | -1.793285 |
| C                     | 0.352721  | 3.319321  | -1.992792 | S                     | 1.884120  | 1.698696  | -0.600936 |
| S                     | -0.856429 | 2.547767  | -1.028957 | C                     | -0.232032 | 0.600480  | 0.896721  |
| H                     | -2.298544 | -0.009191 | -0.881951 | H                     | -4.712923 | -0.058135 | -0.398492 |
| H                     | -5.555184 | 0.515162  | 1.871900  | H                     | -3.944601 | 1.144792  | 3.663740  |
| H                     | -1.517590 | 1.197272  | 3.188713  | H                     | 2.494588  | 3.330555  | -2.314264 |
| H                     | 0.036669  | 4.086683  | -2.699707 | H                     | 0.231364  | 1.012682  | 1.805642  |
| C                     | 2.431659  | -0.243900 | 2.141722  | C                     | 3.810016  | -0.174864 | 2.321160  |
| C                     | 4.666345  | -0.752858 | 1.382984  | C                     | 4.131240  | -1.421181 | 0.285084  |
| C                     | 2.748791  | -1.492387 | 0.107821  | C                     | 1.883310  | -0.882240 | 1.020151  |
| C                     | -0.154353 | -1.625580 | -0.323571 | C                     | -1.075585 | -2.077500 | -2.666807 |
| C                     | -1.704793 | -2.950648 | -1.855870 | S                     | 0.093116  | -1.027175 | -1.918791 |
| S                     | -1.267777 | -2.919265 | -0.184914 | C                     | 0.363608  | -0.895744 | 0.853354  |
| H                     | 1.779645  | 0.195950  | 2.900711  | H                     | 4.216923  | 0.324341  | 3.201294  |
| H                     | 5.746873  | -0.697257 | 1.519419  | H                     | 4.791151  | -1.898937 | -0.440035 |
| H                     | 2.354335  | -2.034942 | -0.751357 | H                     | -1.226725 | -2.004022 | -3.743433 |
| H                     | -2.439829 | -3.684940 | -2.186053 | H                     | -0.068201 | -1.367448 | 1.750528  |

$\pi$ -2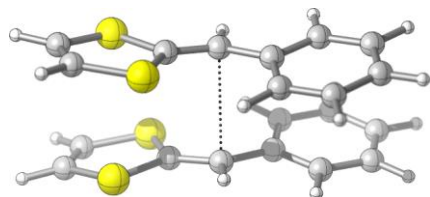

#p m062x/def2svp opt freq empiricaldispersion=gd3  
nosymm geom=connectivity

Charge = 1, Multiplicity = 2, Point group = C1

Electronic Energy = -2362.790900 Hartree

$S^2 = 0.7585$

Number of imaginary frequencies = 0

Sum of electronic and zero-point Energies = -2362.489215 Hartree

Sum of electronic and thermal Energies = -2362.467167 Hartree

Sum of electronic and thermal Enthalpies = -2362.466222 Hartree

Sum of electronic and thermal Free Energies = -2362.543474 Hartree

| Atoms | Cartesian Coordinates |           |           | Atoms | Cartesian Coordinates |           |           |
|-------|-----------------------|-----------|-----------|-------|-----------------------|-----------|-----------|
|       | X                     | Y         | Z         |       | X                     | Y         | Z         |
| C     | 1.685247              | 2.282145  | 0.667015  | C     | 2.958912              | 2.656368  | 1.078761  |
| C     | 4.081866              | 2.288919  | 0.332006  | C     | 3.926073              | 1.529978  | -0.828143 |
| C     | 2.656253              | 1.145614  | -1.239198 | C     | 1.509712              | 1.525114  | -0.509986 |
| C     | -1.050659             | 1.451504  | -0.725237 | C     | -3.629866             | 1.673956  | -0.854332 |
| C     | -3.249893             | 2.531562  | 0.106987  | S     | -2.380716             | 0.738777  | -1.610196 |
| S     | -1.555237             | 2.602805  | 0.483877  | C     | 0.233313              | 1.072463  | -1.026303 |
| H     | 0.835903              | 2.573084  | 1.285061  | H     | 3.078954              | 3.242346  | 1.990702  |
| H     | 5.076842              | 2.593841  | 0.658687  | H     | 4.797944              | 1.233655  | -1.412390 |
| H     | 2.536942              | 0.545651  | -2.143852 | H     | -4.655354             | 1.536327  | -1.197178 |
| H     | -3.921174             | 3.186903  | 0.662130  | H     | 0.311127              | 0.347858  | -1.844257 |
| C     | 2.656368              | -1.145466 | 1.239268  | C     | 3.926174              | -1.529840 | 0.828177  |
| C     | 4.081937              | -2.288713 | -0.332022 | C     | 2.958970              | -2.656075 | -1.078803 |
| C     | 1.685320              | -2.281844 | -0.667022 | C     | 1.509821              | -1.524898 | 0.510034  |
| C     | -1.050507             | -1.451511 | 0.725290  | C     | -3.249545             | -2.531856 | -0.107030 |
| C     | -3.629676             | -1.674297 | 0.854273  | S     | -1.554865             | -2.602893 | -0.483835 |
| S     | -2.380688             | -0.738954 | 1.610196  | C     | 0.233410              | -1.072310 | 1.026364  |
| H     | 2.537076              | -0.545554 | 2.143959  | H     | 4.798058              | -1.233580 | 1.412436  |
| H     | 5.076903              | -2.593641 | -0.658727 | H     | 3.078992              | -3.241980 | -1.990794 |
| H     | 0.835946              | -2.572656 | -1.285095 | H     | -3.920717             | -3.187282 | -0.662205 |
| H     | -4.655200             | -1.536800 | 1.197068  | H     | 0.311166              | -0.347667 | 1.844290  |

## TS-2

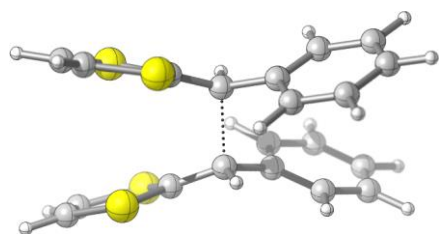

```
#p m062x/def2svp opt=(calcfc,ts,noeigen) freq
empiricaldispersion=gd3 nosymm geom=connectivity
```

Charge = 1, Multiplicity = 2, Point group = C1

Electronic Energy = -2362.779979 Hartree

$\hat{S}^2 = 0.7644$

Number of imaginary frequencies = 1,  $\nu_i = -305.01$

Sum of electronic and zero-point Energies = -2362.477407 Hartree

Sum of electronic and thermal Energies = -2362.456443 Hartree

Sum of electronic and thermal Enthalpies = -2362.455499 Hartree

Sum of electronic and thermal Free Energies = -2362.529969 Hartree

| Cartesian Coordinates |           |           |           | Cartesian Coordinates |           |           |           |
|-----------------------|-----------|-----------|-----------|-----------------------|-----------|-----------|-----------|
| Atoms                 | X         | Y         | Z         | Atoms                 | X         | Y         | Z         |
| C                     | 1.616553  | 2.195782  | 0.926085  | C                     | 2.818516  | 2.819580  | 1.253501  |
| C                     | 3.915087  | 2.721521  | 0.397414  | C                     | 3.807462  | 1.991655  | -0.785757 |
| C                     | 2.606926  | 1.367929  | -1.114934 | C                     | 1.494658  | 1.474631  | -0.270505 |
| C                     | -1.018915 | 1.383945  | -0.649618 | C                     | -3.534729 | 1.767144  | -1.009645 |
| C                     | -3.141247 | 2.732863  | -0.159586 | S                     | -2.301650 | 0.687182  | -1.574812 |
| S                     | -1.461644 | 2.776409  | 0.269587  | C                     | 0.250977  | 0.744505  | -0.643021 |
| H                     | 0.784209  | 2.258256  | 1.631492  | H                     | 2.900522  | 3.378320  | 2.186486  |
| H                     | 4.855672  | 3.208551  | 0.656923  | H                     | 4.663725  | 1.902670  | -1.455100 |
| H                     | 2.531324  | 0.784294  | -2.035028 | H                     | -4.549521 | 1.642819  | -1.387334 |
| H                     | -3.794011 | 3.502259  | 0.253391  | H                     | 0.387633  | 0.112484  | -1.527761 |
| C                     | 2.606915  | -1.367953 | 1.114943  | C                     | 3.807447  | -1.991687 | 0.785768  |
| C                     | 3.915069  | -2.721555 | -0.397402 | C                     | 2.818498  | -2.819606 | -1.253490 |
| C                     | 1.616539  | -2.195800 | -0.926077 | C                     | 1.494648  | -1.474648 | 0.270513  |
| C                     | -1.018925 | -1.383945 | 0.649623  | C                     | -3.141265 | -2.732848 | 0.159588  |
| C                     | -3.534743 | -1.767127 | 1.009646  | S                     | -1.461662 | -2.776406 | -0.269582 |
| S                     | -2.301657 | -0.687173 | 1.574815  | C                     | 0.250971  | -0.744514 | 0.643027  |
| H                     | 2.531316  | -0.784318 | 2.035038  | H                     | 4.663710  | -1.902708 | 1.455113  |
| H                     | 4.855651  | -3.208591 | -0.656910 | H                     | 2.900502  | -3.378347 | -2.186475 |
| H                     | 0.784196  | -2.258268 | -1.631485 | H                     | -3.794035 | -3.502239 | -0.253390 |
| H                     | -4.549534 | -1.642795 | 1.387334  | H                     | 0.387631  | -0.112493 | 1.527768  |

**σ-2**

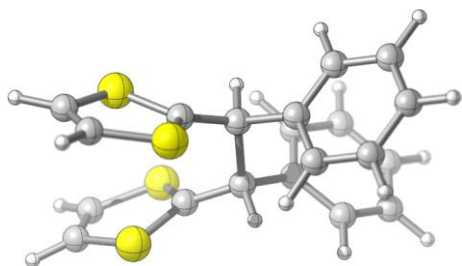

```
#p m062x/def2svp opt freq
empiricaldispersion=gd3 nosymm
geom=connectivity
```

Charge = 1, Multiplicity = 2, Point group = C1  
Electronic Energy = -2362.783032 Hartree  
 $\hat{S}^2 = 0.7575$   
Number of imaginary frequencies = 0  
Sum of electronic and zero-point Energies = -2362.479173 Hartree  
Sum of electronic and thermal Energies = -2362.457953 Hartree  
Sum of electronic and thermal Enthalpies = -2362.457009 Hartree  
Sum of electronic and thermal Free Energies = -2362.532945 Hartree

| Cartesian Coordinates |           |           |           | Cartesian Coordinates |           |           |           |
|-----------------------|-----------|-----------|-----------|-----------------------|-----------|-----------|-----------|
| Atoms                 | X         | Y         | Z         | Atoms                 | X         | Y         | Z         |
| C                     | 1.677782  | 2.052854  | 1.074426  | C                     | 2.812952  | 2.816607  | 1.340169  |
| C                     | 3.769655  | 3.016392  | 0.345900  | C                     | 3.587903  | 2.449150  | -0.914206 |
| C                     | 2.450705  | 1.689436  | -1.181948 | C                     | 1.483514  | 1.490893  | -0.193444 |
| C                     | -1.010079 | 1.390269  | -0.516638 | C                     | -3.489542 | 1.894917  | -0.876209 |
| C                     | -3.059462 | 2.799409  | 0.025863  | S                     | -2.291930 | 0.808406  | -1.501222 |
| S                     | -1.381329 | 2.759113  | 0.449492  | C                     | 0.261620  | 0.654347  | -0.508917 |
| H                     | 0.948883  | 1.896952  | 1.874702  | H                     | 2.952938  | 3.251216  | 2.330564  |
| H                     | 4.659876  | 3.610204  | 0.555798  | H                     | 4.336157  | 2.594927  | -1.693991 |
| H                     | 2.316574  | 1.240971  | -2.168692 | H                     | -4.506640 | 1.834872  | -1.263210 |
| H                     | -3.683466 | 3.573560  | 0.473227  | H                     | 0.389689  | 0.201448  | -1.502947 |
| C                     | 2.451415  | -1.688333 | 1.181903  | C                     | 3.588957  | -2.447536 | 0.914175  |
| C                     | 3.771033  | -3.014605 | -0.345964 | C                     | 2.814307  | -2.815154 | -1.340278 |
| C                     | 1.678790  | -2.051914 | -1.074547 | C                     | 1.484196  | -1.490139 | 0.193356  |
| C                     | -1.009449 | -1.390656 | 0.516521  | C                     | -3.058176 | -2.800746 | -0.025992 |
| C                     | -3.488691 | -1.896428 | 0.876045  | S                     | -1.380053 | -2.759691 | -0.449586 |
| S                     | -2.291591 | -0.809350 | 1.501054  | C                     | 0.261914  | -0.654153 | 0.508815  |
| H                     | 2.317028  | -1.240002 | 2.168673  | H                     | 4.337226  | -2.593049 | 1.693995  |
| H                     | 4.661523  | -3.608016 | -0.555851 | H                     | 2.954545  | -3.249622 | -2.330699 |
| H                     | 0.949876  | -1.896262 | -1.874857 | H                     | -3.681815 | -3.575196 | -0.473349 |
| H                     | -4.505825 | -1.836839 | 1.263023  | H                     | 0.389762  | -0.201196 | 1.502847  |

$\pi$ -3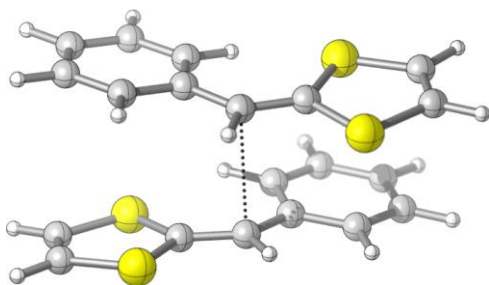

#p m062x/def2svp opt freq  
 empiricaldispersion=gd3 nosymm  
 geom=connectivity

Charge = 1, Multiplicity = 2, Point group = C1

Electronic Energy = -2362.796197 Hartree

$\hat{S}^2 = 0.7615$

Number of imaginary frequencies = 0

Sum of electronic and zero-point Energies = -2362.493912 Hartree

Sum of electronic and thermal Energies = -2362.472224 Hartree

Sum of electronic and thermal Enthalpies = -2362.471280 Hartree

Sum of electronic and thermal Free Energies = -2362.546170 Hartree

| Cartesian Coordinates |           |           |           | Cartesian Coordinates |           |           |           |
|-----------------------|-----------|-----------|-----------|-----------------------|-----------|-----------|-----------|
| Atoms                 | X         | Y         | Z         | Atoms                 | X         | Y         | Z         |
| C                     | -0.713607 | 1.609592  | -1.527056 | C                     | -1.777302 | 1.853315  | -2.392072 |
| C                     | -3.042710 | 2.161065  | -1.892655 | C                     | -3.244688 | 2.220032  | -0.511412 |
| C                     | -2.187697 | 1.981477  | 0.356759  | C                     | -0.895686 | 1.679251  | -0.128621 |
| C                     | 1.497703  | 1.317895  | 0.727905  | C                     | 4.004338  | 1.037387  | 1.315464  |
| C                     | 3.966899  | 1.180034  | -0.020734 | S                     | 2.485730  | 1.059270  | 2.144578  |
| S                     | 2.406892  | 1.371280  | -0.751649 | C                     | 0.132814  | 1.435477  | 0.863170  |
| H                     | 0.253155  | 1.359343  | -1.961065 | H                     | -1.612851 | 1.805787  | -3.469250 |
| H                     | -3.867169 | 2.362944  | -2.577643 | H                     | -4.228647 | 2.468959  | -0.111456 |
| H                     | -2.345500 | 2.049912  | 1.435296  | H                     | 4.912212  | 0.914933  | 1.905954  |
| H                     | 4.839170  | 1.188124  | -0.674269 | H                     | -0.227857 | 1.422630  | 1.896796  |
| C                     | 2.187705  | -1.981878 | 0.355080  | C                     | 3.244646  | -2.219826 | -0.513319 |
| C                     | 3.042613  | -2.159772 | -1.894509 | C                     | 1.777211  | -1.851537 | -2.393640 |
| C                     | 0.713569  | -1.608402 | -1.528392 | C                     | 0.895700  | -1.679185 | -0.130022 |
| C                     | -1.497663 | -1.318479 | 0.726718  | C                     | -3.966771 | -1.179856 | -0.022019 |
| C                     | -4.004320 | -1.038339 | 1.314300  | S                     | -2.406714 | -1.370563 | -0.752963 |
| S                     | -2.485787 | -1.061000 | 2.143528  | C                     | -0.132783 | -1.436172 | 0.861961  |
| H                     | 2.345541  | -2.051172 | 1.433557  | H                     | 4.228604  | -2.469136 | -0.113597 |
| H                     | 3.867030  | -2.361182 | -2.579686 | H                     | 1.612723  | -1.803156 | -3.470775 |
| H                     | -0.253199 | -1.357725 | -1.962154 | H                     | -4.838989 | -1.187355 | -0.675632 |
| H                     | -4.912242 | -0.916341 | 1.904810  | H                     | 0.227859  | -1.424184 | 1.895608  |



### TS-3

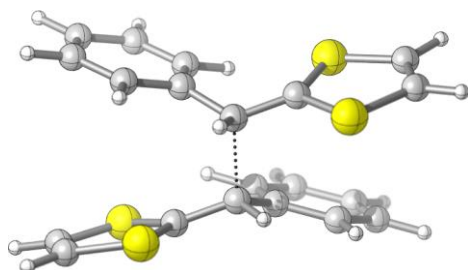

```
#p m062x/def2svp opt=(calcfc,ts,noeigen) freq
empiricaldispersion=gd3 nosymm
geom=connectivity
```

Charge = 1, Multiplicity = 2, Point group = C1

Electronic Energy = -2362.782721 Hartree

$\hat{S}^2 = 0.7635$

Number of imaginary frequencies = 1,  $\nu_i = -208.91$

Sum of electronic and zero-point Energies = -2362.479380 Hartree

Sum of electronic and thermal Energies = -2362.458649 Hartree

Sum of electronic and thermal Enthalpies = -2362.457704 Hartree

Sum of electronic and thermal Free Energies = -2362.531032 Hartree

| Cartesian Coordinates |           |           |           | Cartesian Coordinates |           |           |           |
|-----------------------|-----------|-----------|-----------|-----------------------|-----------|-----------|-----------|
| Atoms                 | X         | Y         | Z         | Atoms                 | X         | Y         | Z         |
| C                     | -0.496349 | 1.545652  | -1.638743 | C                     | -1.433674 | 2.051876  | -2.539677 |
| C                     | -2.653323 | 2.549665  | -2.086133 | C                     | -2.930368 | 2.550356  | -0.719252 |
| C                     | -1.995248 | 2.047324  | 0.180654  | C                     | -0.767206 | 1.532194  | -0.263312 |
| C                     | 1.551228  | 1.120914  | 0.761387  | C                     | 4.005329  | 0.974951  | 1.524778  |
| C                     | 4.053137  | 1.194441  | 0.199099  | S                     | 2.425304  | 0.885057  | 2.230782  |
| S                     | 2.538808  | 1.344970  | -0.628689 | C                     | 0.126808  | 0.917936  | 0.766273  |
| H                     | 0.434649  | 1.142769  | -2.035940 | H                     | -1.203936 | 2.056685  | -3.605916 |
| H                     | -3.380895 | 2.946766  | -2.794856 | H                     | -3.874195 | 2.953754  | -0.350090 |
| H                     | -2.217409 | 2.058513  | 1.250419  | H                     | 4.872811  | 0.876952  | 2.177086  |
| H                     | 4.967801  | 1.297730  | -0.384743 | H                     | -0.275345 | 1.117332  | 1.769444  |
| C                     | 1.995226  | -2.047283 | 0.181192  | C                     | 2.930291  | -2.550603 | -0.718609 |
| C                     | 2.653167  | -2.550341 | -2.085475 | C                     | 1.433495  | -2.052686 | -2.539106 |
| C                     | 0.496226  | -1.546173 | -1.638277 | C                     | 0.767161  | -1.532285 | -0.262865 |
| C                     | -1.551210 | -1.120675 | 0.761841  | C                     | -4.053153 | -1.194392 | 0.199722  |
| C                     | -4.005267 | -0.974458 | 1.525325  | S                     | -2.538871 | -1.345196 | -0.628103 |
| S                     | -2.425201 | -0.884329 | 2.231207  | C                     | -0.126790 | -0.917698 | 0.766576  |
| H                     | 2.217449  | -2.058133 | 1.250948  | H                     | 3.874138  | -2.953890 | -0.349375 |
| H                     | 3.380695  | -2.947671 | -2.794114 | H                     | 1.203697  | -2.057829 | -3.605329 |
| H                     | -0.434791 | -1.143403 | -2.035545 | H                     | -4.967850 | -1.297873 | -0.384032 |
| H                     | -4.872712 | -0.876240 | 2.177650  | H                     | 0.275423  | -1.116771 | 1.769787  |

**σ-3**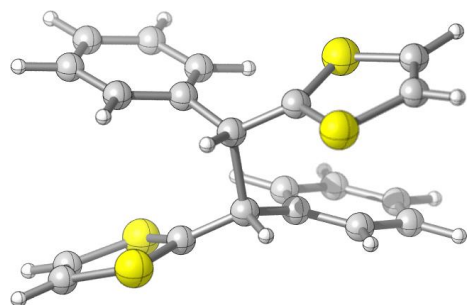

```
#p m062x/def2svp opt freq
empiricaldispersion=gd3 nosymm
geom=connectivity
```

Charge = 1, Multiplicity = 2, Point group = C1

Electronic Energy = -2362.782815 Hartree

$\hat{S}^2 = 0.7607$

Number of imaginary frequencies = 0

Sum of electronic and zero-point Energies = -2362.478772 Hartree

Sum of electronic and thermal Energies = -2362.457568 Hartree

Sum of electronic and thermal Enthalpies = -2362.456624 Hartree

Sum of electronic and thermal Free Energies = -2362.531229 Hartree

| Cartesian Coordinates |           |           |           | Cartesian Coordinates |           |           |           |
|-----------------------|-----------|-----------|-----------|-----------------------|-----------|-----------|-----------|
| Atoms                 | X         | Y         | Z         | Atoms                 | X         | Y         | Z         |
| C                     | -0.449922 | 1.554891  | -1.651291 | C                     | -1.355718 | 2.111469  | -2.555089 |
| C                     | -2.559822 | 2.650433  | -2.107388 | C                     | -2.852320 | 2.641607  | -0.744017 |
| C                     | -1.947424 | 2.089242  | 0.158378  | C                     | -0.736716 | 1.532535  | -0.280026 |
| C                     | 1.564207  | 1.091016  | 0.769672  | C                     | 4.006649  | 0.936503  | 1.560926  |
| C                     | 4.070051  | 1.166714  | 0.237337  | S                     | 2.417786  | 0.842939  | 2.245861  |
| S                     | 2.565623  | 1.326222  | -0.605566 | C                     | 0.127777  | 0.866753  | 0.754987  |
| H                     | 0.469412  | 1.121467  | -2.043821 | H                     | -1.113531 | 2.122802  | -3.618516 |
| H                     | -3.263168 | 3.086221  | -2.817840 | H                     | -3.783992 | 3.075799  | -0.379023 |
| H                     | -2.182061 | 2.092869  | 1.225642  | H                     | 4.866217  | 0.832748  | 2.222749  |
| H                     | 4.991697  | 1.274518  | -0.334634 | H                     | -0.274610 | 1.112450  | 1.749459  |
| C                     | 1.947121  | -2.089734 | 0.155777  | C                     | 2.852144  | -2.640909 | -0.747217 |
| C                     | 2.560011  | -2.647584 | -2.110677 | C                     | 1.356148  | -2.107666 | -2.557872 |
| C                     | 0.450221  | -1.552293 | -1.653465 | C                     | 0.736628  | -1.532134 | -0.282081 |
| C                     | -1.564397 | -1.092103 | 0.768277  | C                     | -4.070333 | -1.167182 | 0.236210  |
| C                     | -4.006748 | -0.938852 | 1.560114  | S                     | -2.566018 | -1.325419 | -0.607133 |
| S                     | -2.417787 | -0.846196 | 2.244940  | C                     | -0.127960 | -0.867779 | 0.753785  |
| H                     | 2.181468  | -2.095055 | 1.223098  | H                     | 3.783629  | -3.075851 | -0.382640 |
| H                     | 3.263461  | -3.082422 | -2.821609 | H                     | 1.114259  | -2.117288 | -3.621383 |
| H                     | -0.468876 | -1.118028 | -2.045601 | H                     | -4.992058 | -1.274228 | -0.335777 |
| H                     | -4.866222 | -0.836094 | 2.222214  | H                     | 0.274435  | -1.114838 | 1.747916  |

$\pi$ -4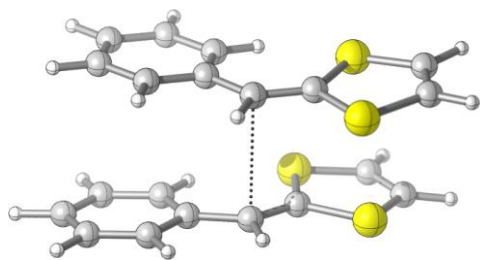

```
#p m062x/def2svp opt freq
empiricaldispersion=gd3 nosymm
geom=connectivity
```

Charge = 1, Multiplicity = 2, Point group = C1

Electronic Energy = -2362.795099 Hartree

 $S^2 = 0.7604$ 

Number of imaginary frequencies = 0

Sum of electronic and zero-point Energies = -2362.493020 Hartree

Sum of electronic and thermal Energies = -2362.471203 Hartree

Sum of electronic and thermal Enthalpies = -2362.470258 Hartree

Sum of electronic and thermal Free Energies = -2362.545622 Hartree

| Cartesian Coordinates |           |           |           | Cartesian Coordinates |           |           |           |
|-----------------------|-----------|-----------|-----------|-----------------------|-----------|-----------|-----------|
| Atoms                 | X         | Y         | Z         | Atoms                 | X         | Y         | Z         |
| C                     | 0.958527  | 1.572372  | 1.461403  | C                     | 2.096766  | 1.733048  | 2.245155  |
| C                     | 3.332451  | 1.998497  | 1.654102  | C                     | 3.431369  | 2.094666  | 0.263341  |
| C                     | 2.302537  | 1.928684  | -0.523643 | C                     | 1.037724  | 1.673836  | 0.054563  |
| C                     | -1.423570 | 1.434553  | -0.628977 | C                     | -3.839409 | 1.342347  | 0.296756  |
| C                     | -3.979563 | 1.295966  | -1.038420 | S                     | -2.219276 | 1.412424  | 0.922288  |
| S                     | -2.526282 | 1.304845  | -1.980283 | C                     | -0.073326 | 1.528464  | -0.860067 |
| C                     | 2.532808  | -1.128017 | -2.031476 | C                     | 3.914897  | -1.005736 | -1.990037 |
| C                     | 4.582737  | -1.082275 | -0.766237 | C                     | 3.855633  | -1.278965 | 0.410061  |
| C                     | 2.472300  | -1.399912 | 0.374086  | C                     | 1.779302  | -1.329151 | -0.852815 |
| C                     | -0.649347 | -1.660562 | -0.087868 | C                     | -2.976500 | -2.165601 | 0.939049  |
| C                     | -2.145106 | -2.057772 | 1.988765  | S                     | -2.292824 | -1.919264 | -0.633716 |
| S                     | -0.486745 | -1.669972 | 1.649505  | C                     | 0.346195  | -1.462275 | -1.012933 |
| H                     | 0.014204  | 1.373858  | 1.964855  | H                     | 2.015569  | 1.661245  | 3.330358  |
| H                     | 4.217282  | 2.135735  | 2.277118  | H                     | 4.394100  | 2.301034  | -0.205666 |
| H                     | 2.383076  | 2.007356  | -1.609574 | H                     | -4.662173 | 1.357097  | 1.011635  |
| H                     | -4.933130 | 1.260803  | -1.565392 | H                     | 0.206064  | 1.555165  | -1.918223 |
| H                     | 2.014431  | -1.082416 | -2.991971 | H                     | 4.475840  | -0.860842 | -2.913912 |
| H                     | 5.669519  | -0.996113 | -0.729137 | H                     | 4.374105  | -1.344087 | 1.367382  |
| H                     | 1.949828  | -1.565152 | 1.314379  | H                     | -4.036248 | -2.412088 | 1.005739  |
| H                     | -2.431378 | -2.196817 | 3.031274  | H                     | 0.003415  | -1.465966 | -2.052816 |

### TS-4

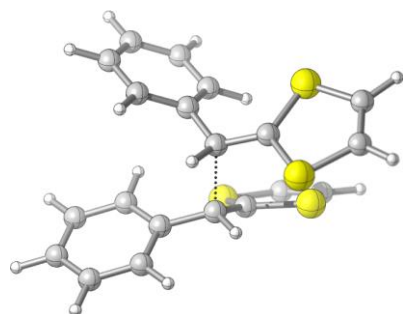

```
#p m062x/def2svp opt=(calcfc,ts,noeigen) freq
empiricaldispersion=gd3 nosymm geom=connectivity
```

Charge = 1, Multiplicity = 2, Point group = C1

Electronic Energy = -2362.780699 Hartree

$\hat{S}^2 = 0.7661$

Number of imaginary frequencies = 1,  $\nu_i = -301.53$

Sum of electronic and zero-point Energies = -2362.477803 Hartree

Sum of electronic and thermal Energies = -2362.456977 Hartree

Sum of electronic and thermal Enthalpies = -2362.456033 Hartree

Sum of electronic and thermal Free Energies = -2362.529950 Hartree

| Cartesian Coordinates |           |           |           | Cartesian Coordinates |           |           |           |
|-----------------------|-----------|-----------|-----------|-----------------------|-----------|-----------|-----------|
| Atoms                 | X         | Y         | Z         | Atoms                 | X         | Y         | Z         |
| C                     | 0.097373  | -1.515681 | -1.537483 | C                     | 0.792617  | -2.215735 | -2.521719 |
| C                     | 1.838304  | -3.068514 | -2.168427 | C                     | 2.189775  | -3.217933 | -0.826596 |
| C                     | 1.501111  | -2.514324 | 0.157251  | C                     | 0.442087  | -1.662169 | -0.184580 |
| C                     | -1.647174 | -0.865361 | 0.995974  | C                     | -4.185455 | -0.977991 | 0.638714  |
| C                     | -4.030978 | -0.347392 | 1.816141  | S                     | -2.748665 | -1.505751 | -0.176502 |
| S                     | -2.402267 | -0.138901 | 2.376424  | C                     | -0.227697 | -0.887958 | 0.889697  |
| C                     | 2.343497  | 1.266210  | 2.300592  | C                     | 3.696209  | 1.196445  | 2.619744  |
| C                     | 4.613499  | 0.742345  | 1.672012  | C                     | 4.168907  | 0.350866  | 0.410249  |
| C                     | 2.815095  | 0.419223  | 0.087159  | C                     | 1.886724  | 0.893843  | 1.027310  |
| C                     | -0.083571 | 1.551399  | -0.436478 | C                     | -1.736891 | 2.454600  | -2.188158 |
| C                     | -0.545494 | 2.398600  | -2.810611 | S                     | -1.761288 | 1.953903  | -0.527734 |
| S                     | 0.804063  | 1.829978  | -1.886726 | C                     | 0.427049  | 0.980184  | 0.758808  |
| H                     | -0.706012 | -0.837030 | -1.834257 | H                     | 0.516912  | -2.093522 | -3.569902 |
| H                     | 2.379289  | -3.617469 | -2.940072 | H                     | 3.007446  | -3.882161 | -0.544863 |
| H                     | 1.790723  | -2.618664 | 1.205048  | H                     | -5.147302 | -1.200561 | 0.176303  |
| H                     | -4.844563 | 0.012732  | 2.445671  | H                     | 0.264586  | -0.995967 | 1.862364  |
| H                     | 1.630564  | 1.628996  | 3.044866  | H                     | 4.035367  | 1.500773  | 3.610444  |
| H                     | 5.674299  | 0.688537  | 1.919296  | H                     | 4.878874  | -0.020446 | -0.329630 |
| H                     | 2.490154  | 0.062419  | -0.891879 | H                     | -2.664293 | 2.806927  | -2.639068 |
| H                     | -0.368024 | 2.696913  | -3.844073 | H                     | -0.139150 | 1.317857  | 1.636325  |

**σ-4**

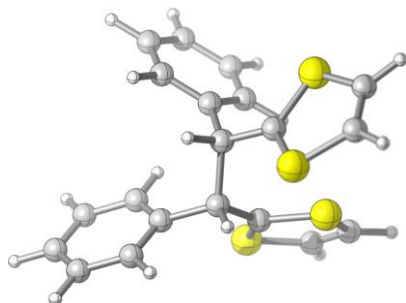

#p m062x/def2svp opt freq empiricaldispersion=gd3  
nosymm geom=connectivity

Charge = 1, Multiplicity = 2, Point group = C1

Electronic Energy = -2362.785687 Hartree

$\hat{S}^2 = 0.7580$

Number of imaginary frequencies = 0

Sum of electronic and zero-point Energies = -2362.481184 Hartree

Sum of electronic and thermal Energies = -2362.460270 Hartree

Sum of electronic and thermal Enthalpies = -2362.459325 Hartree

Sum of electronic and thermal Free Energies = -2362.533249 Hartree

| Cartesian Coordinates |           |           |           | Cartesian Coordinates |           |           |           |
|-----------------------|-----------|-----------|-----------|-----------------------|-----------|-----------|-----------|
| Atoms                 | X         | Y         | Z         | Atoms                 | X         | Y         | Z         |
| C                     | -0.180223 | -1.868514 | -1.025439 | C                     | 0.277649  | -3.020510 | -1.662537 |
| C                     | 1.037401  | -3.955485 | -0.959260 | C                     | 1.330025  | -3.738847 | 0.386303  |
| C                     | 0.875077  | -2.585254 | 1.022127  | C                     | 0.122050  | -1.636145 | 0.324056  |
| C                     | -1.767683 | -0.150283 | 1.061431  | C                     | -4.309909 | -0.326221 | 0.902873  |
| C                     | -4.085615 | 0.819566  | 1.570718  | S                     | -2.929225 | -1.283026 | 0.471643  |
| S                     | -2.427023 | 1.197240  | 1.924784  | C                     | -0.299792 | -0.367688 | 1.030068  |
| C                     | 2.503340  | 1.749090  | 1.777061  | C                     | 3.855679  | 1.705658  | 2.109957  |
| C                     | 4.696637  | 0.785236  | 1.487120  | C                     | 4.179179  | -0.090812 | 0.534045  |
| C                     | 2.825857  | -0.052169 | 0.202260  | C                     | 1.974311  | 0.875340  | 0.820823  |
| C                     | 0.172796  | 1.280438  | -0.897427 | C                     | -1.153282 | 1.763031  | -3.026598 |
| C                     | 0.120435  | 1.568424  | -3.425403 | S                     | -1.442043 | 1.652827  | -1.320797 |
| S                     | 1.281532  | 1.240212  | -2.193364 | C                     | 0.494271  | 0.955933  | 0.507481  |
| H                     | -0.785462 | -1.154433 | -1.588785 | H                     | 0.036062  | -3.190970 | -2.712392 |
| H                     | 1.394693  | -4.856381 | -1.459393 | H                     | 1.917765  | -4.468534 | 0.944247  |
| H                     | 1.122393  | -2.410782 | 2.071546  | H                     | -5.298284 | -0.704763 | 0.641354  |
| H                     | -4.859340 | 1.498778  | 1.927973  | H                     | 0.066461  | -0.420155 | 2.068080  |
| H                     | 1.850706  | 2.476066  | 2.266382  | H                     | 4.252012  | 2.394899  | 2.856301  |
| H                     | 5.755778  | 0.749846  | 1.744696  | H                     | 4.831140  | -0.816482 | 0.046463  |
| H                     | 2.440836  | -0.758973 | -0.535269 | H                     | -1.989988 | 1.996975  | -3.684607 |
| H                     | 0.466250  | 1.623262  | -4.458022 | H                     | 0.070066  | 1.764049  | 1.129293  |

$\pi$ -5

#p m062x/def2svp opt freq empiricaldispersion=gd3  
nosymm geom=connectivity

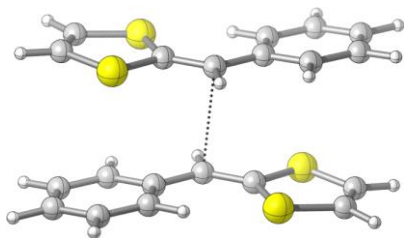

Charge = 1, Multiplicity = 2, Point group = C1

Electronic Energy = -2362.792111 Hartree

$\hat{S}^2 = 0.7595$

Number of imaginary frequencies = 1,  $\nu_i = -3.42$

Sum of electronic and zero-point Energies = -2362.490376 Hartree

Sum of electronic and thermal Energies = -2362.469291 Hartree

Sum of electronic and thermal Enthalpies = -2362.468347 Hartree

Sum of electronic and thermal Free Energies = -2362.541970 Hartree

| Cartesian Coordinates |           |           |           | Cartesian Coordinates |           |           |           |
|-----------------------|-----------|-----------|-----------|-----------------------|-----------|-----------|-----------|
| Atoms                 | X         | Y         | Z         | Atoms                 | X         | Y         | Z         |
| C                     | 1.756965  | -2.341956 | -0.436925 | C                     | 3.079499  | -2.683220 | -0.701129 |
| C                     | 4.114689  | -2.181506 | 0.090152  | C                     | 3.819817  | -1.322356 | 1.150376  |
| C                     | 2.501272  | -0.975179 | 1.416839  | C                     | 1.439144  | -1.485855 | 0.638858  |
| C                     | -1.135540 | -1.503361 | 0.603493  | C                     | -3.214206 | -2.589619 | -0.485866 |
| C                     | -3.702996 | -1.791028 | 0.478416  | S                     | -1.489176 | -2.620220 | -0.686096 |
| S                     | -2.555991 | -0.888201 | 1.404781  | C                     | 0.103752  | -1.068883 | 1.014244  |
| C                     | -2.500893 | 0.974586  | -1.417296 | C                     | -3.819571 | 1.321494  | -1.151150 |
| C                     | -4.114835 | 2.180915  | -0.091252 | C                     | -3.079900 | 2.683181  | 0.700012  |
| C                     | -1.757234 | 2.342175  | 0.436133  | C                     | -1.439020 | 1.485779  | -0.639300 |
| C                     | 1.135652  | 1.503645  | -0.603197 | C                     | 3.703035  | 1.791584  | -0.477301 |
| C                     | 3.213872  | 2.589908  | 0.487009  | S                     | 2.556406  | 0.888836  | -1.404215 |
| S                     | 1.488774  | 2.620278  | 0.686727  | C                     | -0.103467 | 1.069034  | -1.014338 |
| H                     | 0.981264  | -2.754033 | -1.081199 | H                     | 3.304116  | -3.352494 | -1.532392 |
| H                     | 5.147303  | -2.465178 | -0.116880 | H                     | 4.621040  | -0.929968 | 1.778213  |
| H                     | 2.273860  | -0.312090 | 2.254976  | H                     | -3.814094 | -3.219818 | -1.142310 |
| H                     | -4.760416 | -1.676050 | 0.716426  | H                     | 0.074669  | -0.341178 | 1.832436  |
| H                     | -2.273173 | 0.311302  | -2.255195 | H                     | -4.620591 | 0.928698  | -1.778989 |
| H                     | -5.147555 | 2.464389  | 0.115522  | H                     | -3.304819 | 3.352703  | 1.530992  |
| H                     | -0.981737 | 2.754750  | 1.080334  | H                     | 4.760540  | 1.676773  | -0.715020 |
| H                     | 3.813493  | 3.220033  | 1.143768  | H                     | -0.074048 | 0.341371  | -1.832555 |

## TS-5

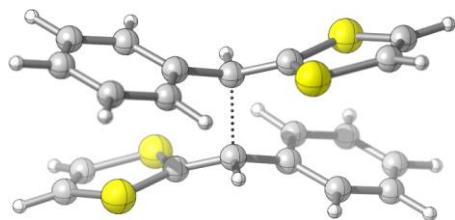

```
#p m062x/def2svp opt=(calcfc,ts,noeigen) freq
empiricaldispersion=gd3 nosymm
geom=connectivity
```

Charge = 1, Multiplicity = 2, Point group = C1

Electronic Energy = -2362.781574 Hartree

$\hat{S}^2 = 0.7607$

Number of imaginary frequencies = 1,  $\nu_i = -291.39$

Sum of electronic and zero-point Energies = -2362.478911 Hartree

Sum of electronic and thermal Energies = -2362.457970 Hartree

Sum of electronic and thermal Enthalpies = -2362.457026 Hartree

Sum of electronic and thermal Free Energies = -2362.531973 Hartree

| Cartesian Coordinates |           |           |           | Cartesian Coordinates |           |           |           |
|-----------------------|-----------|-----------|-----------|-----------------------|-----------|-----------|-----------|
| Atoms                 | X         | Y         | Z         | Atoms                 | X         | Y         | Z         |
| C                     | 1.527041  | -2.267230 | -0.612446 | C                     | 2.781334  | -2.862005 | -0.740468 |
| C                     | 3.763140  | -2.650124 | 0.225914  | C                     | 3.484189  | -1.839044 | 1.325813  |
| C                     | 2.229455  | -1.249353 | 1.458249  | C                     | 1.231062  | -1.462263 | 0.497199  |
| C                     | -1.319460 | -1.350536 | 0.469635  | C                     | -3.362407 | -2.640147 | -0.414835 |
| C                     | -3.850857 | -1.805428 | 0.519367  | S                     | -1.651540 | -2.584093 | -0.692134 |
| S                     | -2.709550 | -0.782206 | 1.318856  | C                     | -0.051196 | -0.722939 | 0.655943  |
| C                     | -2.229477 | 1.249291  | -1.458338 | C                     | -3.484208 | 1.838985  | -1.325892 |
| C                     | -3.763153 | 2.650055  | -0.225985 | C                     | -2.781344 | 2.861924  | 0.740396  |
| C                     | -1.527053 | 2.267145  | 0.612365  | C                     | -1.231081 | 1.462189  | -0.497288 |
| C                     | 1.319438  | 1.350463  | -0.469752 | C                     | 3.850829  | 1.805386  | -0.519534 |
| C                     | 3.362379  | 2.640139  | 0.414638  | S                     | 2.709527  | 0.782112  | -1.318963 |
| S                     | 1.651516  | 2.584074  | 0.691961  | C                     | 0.051175  | 0.722860  | -0.656038 |
| H                     | 0.800759  | -2.417449 | -1.413070 | H                     | 2.993785  | -3.487535 | -1.608300 |
| H                     | 4.743112  | -3.117366 | 0.122659  | H                     | 4.244751  | -1.669089 | 2.089013  |
| H                     | 2.017487  | -0.616541 | 2.323363  | H                     | -3.952333 | -3.351453 | -0.992586 |
| H                     | -4.899215 | -1.736020 | 0.809327  | H                     | -0.050152 | -0.092541 | 1.554128  |
| H                     | -2.017513 | 0.616487  | -2.323459 | H                     | -4.244773 | 1.669040  | -2.089092 |
| H                     | -4.743124 | 3.117298  | -0.122722 | H                     | -2.993791 | 3.487445  | 1.608236  |
| H                     | -0.800768 | 2.417351  | 1.412989  | H                     | 4.899184  | 1.735978  | -0.809503 |
| H                     | 3.952303  | 3.351476  | 0.992352  | H                     | 0.050122  | 0.092451  | -1.554216 |

**σ-5**

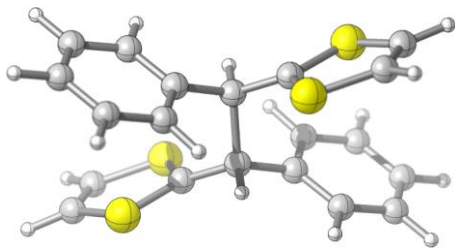

```
#p m062x/def2svp opt freq  
empiricaldispersion=gd3 nosymm  
geom=connectivity
```

Charge = 1, Multiplicity = 2, Point group = C1

Electronic Energy = -2362.783675 Hartree

$\hat{S}^2 = 0.7573$

Number of imaginary frequencies = 1,  $\nu_i = -12.81$

Sum of electronic and zero-point Energies = -2362.479874 Hartree

Sum of electronic and thermal Energies = -2362.459517 Hartree

Sum of electronic and thermal Enthalpies = -2362.458573 Hartree

Sum of electronic and thermal Free Energies = -2362.531928 Hartree

| Cartesian Coordinates |           |           |           | Cartesian Coordinates |           |           |           |
|-----------------------|-----------|-----------|-----------|-----------------------|-----------|-----------|-----------|
| Atoms                 | X         | Y         | Z         | Atoms                 | X         | Y         | Z         |
| C                     | 1.587249  | -2.127014 | -0.744009 | C                     | 2.805304  | -2.796554 | -0.845070 |
| C                     | 3.706060  | -2.777613 | 0.219284  | C                     | 3.381299  | -2.088439 | 1.386335  |
| C                     | 2.158442  | -1.426385 | 1.490301  | C                     | 1.247503  | -1.442881 | 0.430173  |
| C                     | -1.283917 | -1.373551 | 0.404929  | C                     | -3.249941 | -2.759611 | -0.487236 |
| C                     | -3.763807 | -2.020874 | 0.513154  | S                     | -1.560618 | -2.555294 | -0.814138 |
| S                     | -2.672090 | -0.955033 | 1.325644  | C                     | -0.022539 | -0.632598 | 0.549619  |
| C                     | -2.155763 | 1.422378  | -1.489140 | C                     | -3.379003 | 2.083860  | -1.385577 |
| C                     | -3.705201 | 2.771537  | -0.218058 | C                     | -2.805639 | 2.789393  | 0.847342  |
| C                     | -1.587300 | 2.120339  | 0.746729  | C                     | -1.245959 | 1.437987  | -0.428047 |
| C                     | 1.285026  | 1.372321  | -0.403458 | C                     | 3.763152  | 2.026486  | -0.511876 |
| C                     | 3.243273  | 2.776876  | 0.476679  | S                     | 2.678065  | 0.945607  | -1.313241 |
| S                     | 1.553651  | 2.571228  | 0.800571  | C                     | 0.024958  | 0.628975  | -0.546794 |
| H                     | 0.922724  | -2.122300 | -1.611608 | H                     | 3.055381  | -3.327029 | -1.764671 |
| H                     | 4.660075  | -3.299727 | 0.138090  | H                     | 4.079804  | -2.068850 | 2.223791  |
| H                     | 1.910259  | -0.888852 | 2.408466  | H                     | -3.806918 | -3.480521 | -1.085408 |
| H                     | -4.801944 | -2.050791 | 0.843699  | H                     | -0.031984 | -0.129495 | 1.528650  |
| H                     | -1.906314 | 0.886218  | -2.407760 | H                     | -4.076619 | 2.065089  | -2.223793 |
| H                     | -4.659474 | 3.293242  | -0.137258 | H                     | -3.056934 | 3.318547  | 1.767375  |
| H                     | -0.923550 | 2.114476  | 1.614949  | H                     | 4.802388  | 2.055247  | -0.839056 |
| H                     | 3.795755  | 3.507542  | 1.067149  | H                     | 0.034915  | 0.124397  | -1.525182 |



$\pi$ -6

#p m062x/def2svp opt freq empiricaldispersion=gd3  
nosymm geom=connectivity

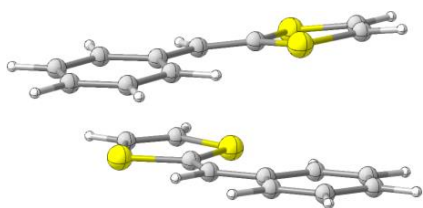

Charge = 1, Multiplicity = 2, Point group = C1

Electronic Energy = -2362.793834 Hartree

$S^2 = 0.7592$

Number of imaginary frequencies = 0

Sum of electronic and zero-point Energies = -2362.491647 Hartree

Sum of electronic and thermal Energies = -2362.469734 Hartree

Sum of electronic and thermal Enthalpies = -2362.468790 Hartree

Sum of electronic and thermal Free Energies = -2362.545319 Hartree

| Cartesian Coordinates |           |           |           | Cartesian Coordinates |           |           |           |
|-----------------------|-----------|-----------|-----------|-----------------------|-----------|-----------|-----------|
| Atoms                 | X         | Y         | Z         | Atoms                 | X         | Y         | Z         |
| C                     | 1.950873  | -1.088366 | 1.346262  | C                     | 3.280175  | -0.750410 | 1.573535  |
| C                     | 3.616951  | 0.486926  | 2.129741  | C                     | 2.608778  | 1.392043  | 2.462885  |
| C                     | 1.278027  | 1.062827  | 2.233789  | C                     | 0.916916  | -0.183034 | 1.669949  |
| C                     | -1.167248 | -1.475790 | 0.910557  | C                     | -1.982630 | -3.658579 | -0.219496 |
| C                     | -3.100262 | -2.956775 | 0.026739  | S                     | -0.472810 | -2.944288 | 0.267964  |
| S                     | -2.915829 | -1.415832 | 0.800649  | C                     | -0.495195 | -0.408849 | 1.451467  |
| C                     | -2.779883 | 1.621909  | -0.935164 | C                     | -3.584075 | 2.627511  | -0.411653 |
| C                     | -3.002032 | 3.719572  | 0.231214  | C                     | -1.610847 | 3.799996  | 0.341744  |
| C                     | -0.801082 | 2.799839  | -0.181935 | C                     | -1.373218 | 1.684222  | -0.831137 |
| C                     | 0.719178  | 0.361845  | -1.522610 | C                     | 2.971342  | -0.745598 | -2.146009 |
| C                     | 3.293575  | 0.464482  | -1.649591 | S                     | 1.293882  | -1.152607 | -2.177245 |
| S                     | 1.995728  | 1.472687  | -1.113831 | C                     | -0.631097 | 0.559232  | -1.364937 |
| H                     | 1.734831  | -2.073522 | 0.935955  | H                     | 4.064435  | -1.468773 | 1.330216  |
| H                     | 4.662079  | 0.735566  | 2.318917  | H                     | 2.860447  | 2.353809  | 2.911300  |
| H                     | 0.488685  | 1.767890  | 2.504023  | H                     | -1.952540 | -4.644095 | -0.683873 |
| H                     | -4.108990 | -3.294630 | -0.211185 | H                     | -1.139961 | 0.414108  | 1.776129  |
| H                     | -3.236599 | 0.773539  | -1.448232 | H                     | -4.668072 | 2.562992  | -0.510481 |
| H                     | -3.628667 | 4.512402  | 0.641184  | H                     | -1.153451 | 4.655765  | 0.839632  |
| H                     | 0.276852  | 2.897246  | -0.062219 | H                     | 3.687405  | -1.475170 | -2.523936 |
| H                     | 4.308059  | 0.855381  | -1.569197 | H                     | -1.256566 | -0.264710 | -1.724732 |

$\pi$ -7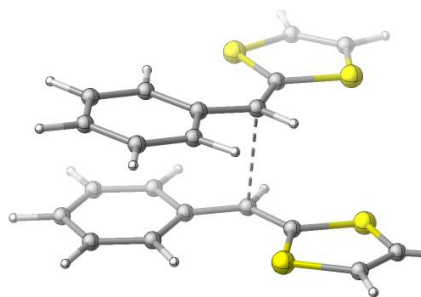

#p m062x/def2svp opt freq empiricaldispersion=gd3  
nosymm geom=connectivity

Charge = 2, Multiplicity = 1, Point group = C1

Electronic Energy = -2362.432691 Hartree

Number of imaginary frequencies = 0

Sum of electronic and zero-point Energies = -2362.129432 Hartree

Sum of electronic and thermal Energies = -2362.108035 Hartree

Sum of electronic and thermal Enthalpies = -2362.107091 Hartree

Sum of electronic and thermal Free Energies = -2362.180648 Hartree

| Atoms | Cartesian Coordinates |           |           | Atoms | Cartesian Coordinates |           |           |
|-------|-----------------------|-----------|-----------|-------|-----------------------|-----------|-----------|
|       | X                     | Y         | Z         |       | X                     | Y         | Z         |
| C     | 2.094126              | 0.192365  | -1.288268 | C     | 3.454208              | 0.062838  | -1.510188 |
| C     | 4.027159              | 0.537629  | -2.698907 | C     | 3.233684              | 1.151707  | -3.673053 |
| C     | 1.871017              | 1.287401  | -3.460046 | C     | 1.265401              | 0.808128  | -2.262755 |
| C     | -1.021777             | 0.735979  | -1.074908 | C     | -3.170146             | 0.691514  | 0.332075  |
| C     | -2.245947             | 0.034683  | 1.064758  | S     | -2.638740             | 1.321628  | -1.181189 |
| S     | -0.662427             | -0.093214 | 0.388311  | C     | -0.145471             | 0.977785  | -2.154971 |
| H     | 1.695075              | -0.167678 | -0.341938 | H     | 4.085943              | -0.393552 | -0.747320 |
| H     | 5.104133              | 0.449436  | -2.853122 | H     | 3.688462              | 1.545182  | -4.582571 |
| H     | 1.255922              | 1.811852  | -4.194640 | H     | -4.201907             | 0.872756  | 0.639345  |
| H     | -2.419134             | -0.395850 | 2.053185  | H     | -0.605212             | 1.540629  | -2.973678 |
| C     | 0.613729              | -2.777113 | -1.598812 | C     | 1.816996              | -3.401521 | -1.310860 |
| C     | 2.866914              | -3.335540 | -2.232177 | C     | 2.708645              | -2.645929 | -3.443143 |
| C     | 1.511392              | -2.017811 | -3.739733 | C     | 0.430983              | -2.066299 | -2.819996 |
| C     | -1.382218             | -0.781493 | -4.127121 | C     | -1.913116             | 0.436410  | -6.318562 |
| C     | -3.083681             | 0.397961  | -5.647176 | S     | -0.552449             | -0.303869 | -5.555921 |
| S     | -3.061136             | -0.394664 | -4.117298 | C     | -0.837011             | -1.442731 | -3.005376 |
| H     | -0.225528             | -2.869129 | -0.905863 | H     | 1.935366              | -3.963222 | -0.383839 |
| H     | 3.808338              | -3.845196 | -2.019113 | H     | 3.526393              | -2.620247 | -4.164250 |
| H     | 1.423168              | -1.515098 | -4.701018 | H     | -1.771554             | 0.875852  | -7.308102 |
| H     | -4.030487             | 0.800367  | -6.012484 | H     | -1.571612             | -1.651725 | -2.221077 |

## TS-6

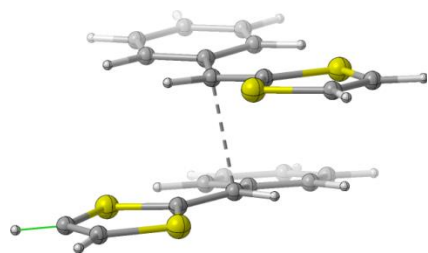

#p m062x/def2svp opt=(calcfc,ts,noeigen) freq  
empiricaldispersion=gd3 nosymm geom=connectivity

Charge = 2, Multiplicity = 1, Point group = C1

Electronic Energy = -2362.432488 Hartree

Number of imaginary frequencies = 1,  $\nu_i = -75.41$

Sum of electronic and zero-point Energies = -2362.129261 Hartree

Sum of electronic and thermal Energies = -2362.108658 Hartree

Sum of electronic and thermal Enthalpies = -2362.107714 Hartree

Sum of electronic and thermal Free Energies = -2362.179393 Hartree

| Cartesian Coordinates |           |           |           | Cartesian Coordinates |           |           |           |
|-----------------------|-----------|-----------|-----------|-----------------------|-----------|-----------|-----------|
| Atoms                 | X         | Y         | Z         | Atoms                 | X         | Y         | Z         |
| C                     | 2.100532  | 0.180475  | -1.331839 | C                     | 3.466379  | 0.129931  | -1.563035 |
| C                     | 4.006988  | 0.677323  | -2.733104 | C                     | 3.175591  | 1.285265  | -3.677466 |
| C                     | 1.807489  | 1.342760  | -3.452591 | C                     | 1.238793  | 0.789217  | -2.275642 |
| C                     | -1.018699 | 0.674379  | -1.020601 | C                     | -3.093970 | 0.687123  | 0.487633  |
| C                     | -2.138087 | 0.045823  | 1.193308  | S                     | -2.629653 | 1.266193  | -1.066816 |
| S                     | -0.594637 | -0.114957 | 0.437341  | C                     | -0.191348 | 0.857952  | -2.164618 |
| H                     | 1.725136  | -0.256759 | -0.408369 | H                     | 4.122934  | -0.328636 | -0.822882 |
| H                     | 5.085309  | 0.647064  | -2.897924 | H                     | 3.602216  | 1.735427  | -4.574291 |
| H                     | 1.163117  | 1.863146  | -4.164952 | H                     | -4.108727 | 0.886024  | 0.838079  |
| H                     | -2.261970 | -0.354334 | 2.201767  | H                     | -0.676933 | 1.446830  | -2.948817 |
| C                     | 0.532041  | -2.790365 | -1.611093 | C                     | 1.697127  | -3.482100 | -1.311800 |
| C                     | 2.774653  | -3.439402 | -2.200415 | C                     | 2.682007  | -2.705606 | -3.389547 |
| C                     | 1.522918  | -2.009266 | -3.694923 | C                     | 0.419680  | -2.035895 | -2.808334 |
| C                     | -1.342575 | -0.733436 | -4.180588 | C                     | -1.822402 | 0.365041  | -6.441707 |
| C                     | -3.009433 | 0.355641  | -5.798424 | S                     | -0.481114 | -0.323750 | -5.601320 |
| S                     | -3.016947 | -0.357005 | -4.230161 | C                     | -0.809793 | -1.318121 | -2.996897 |
| H                     | -0.328846 | -2.865183 | -0.942702 | H                     | 1.761608  | -4.077020 | -0.400291 |
| H                     | 3.685451  | -3.997471 | -1.977140 | H                     | 3.520775  | -2.690136 | -4.086267 |
| H                     | 1.495548  | -1.454344 | -4.631043 | H                     | -1.655337 | 0.752001  | -7.449092 |
| H                     | -3.949645 | 0.732592  | -6.205888 | H                     | -1.578671 | -1.536202 | -2.249347 |

$\sigma$ -6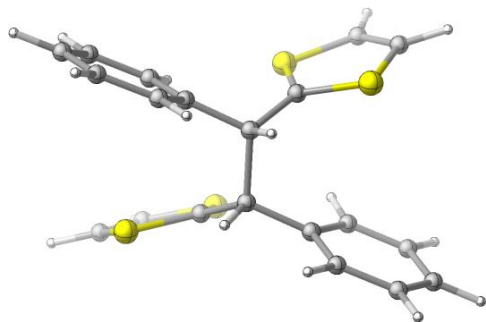

```
#p m062x/def2svp opt freq
empiricaldispersion=gd3 nosymm geom=connecti
vity
```

Charge = 2, Multiplicity = 1, Point group = C1

Electronic Energy = -2362.463446 Hartree

Number of imaginary frequencies = 0

Sum of electronic and zero-point Energies = -2362.157286 Hartree

Sum of electronic and thermal Energies = -2362.136668 Hartree

Sum of electronic and thermal Enthalpies = -2362.135723 Hartree

Sum of electronic and thermal Free Energies = -2362.209997 Hartree

| Atoms | Cartesian Coordinates |           |           | Atoms | Cartesian Coordinates |           |           |
|-------|-----------------------|-----------|-----------|-------|-----------------------|-----------|-----------|
|       | X                     | Y         | Z         |       | X                     | Y         | Z         |
| C     | 1.504774              | 1.839838  | -3.251677 | C     | 1.767115              | 3.056533  | -3.876749 |
| C     | 0.753603              | 4.007612  | -4.010592 | C     | -0.520839             | 3.737037  | -3.517882 |
| C     | -0.781192             | 2.522481  | -2.882047 | C     | 0.227864              | 1.564887  | -2.739089 |
| C     | 0.727195              | -0.112694 | -0.880128 | C     | 2.568821              | -0.615345 | 0.802053  |
| C     | 1.409576              | -0.928682 | 1.431118  | S     | 2.409798              | -0.009627 | -0.796898 |
| S     | -0.017977             | -0.685649 | 0.515968  | C     | -0.126145             | 0.245357  | -2.073937 |
| H     | 2.314901              | 1.107126  | -3.188156 | H     | 2.766781              | 3.265772  | -4.259611 |
| H     | 0.961346              | 4.961645  | -4.496512 | H     | -1.316384             | 4.476392  | -3.616370 |
| H     | -1.780717             | 2.329073  | -2.484669 | H     | 3.567673              | -0.689902 | 1.237476  |
| H     | 1.325907              | -1.300909 | 2.454610  | H     | -1.137411             | 0.360361  | -1.656389 |
| C     | -1.998079             | -2.703029 | -2.429866 | C     | -2.357792             | -3.895434 | -1.800516 |
| C     | -1.386574             | -4.677429 | -1.179812 | C     | -0.054140             | -4.260126 | -1.179243 |
| C     | 0.303579              | -3.064703 | -1.798057 | C     | -0.665900             | -2.278040 | -2.438690 |
| C     | 0.702241              | -1.027385 | -4.194570 | C     | 2.742899              | -1.418922 | -5.663164 |
| C     | 1.910658              | -0.643161 | -6.400310 | S     | 2.168248              | -1.859124 | -4.106009 |
| S     | 0.433728              | -0.216343 | -5.644783 | C     | -0.341979             | -0.951660 | -3.105692 |
| H     | -2.766868             | -2.107010 | -2.927909 | H     | -3.399944             | -4.216487 | -1.807271 |
| H     | -1.664666             | -5.615671 | -0.698330 | H     | 0.709466              | -4.870885 | -0.695957 |
| H     | 1.352150              | -2.755198 | -1.754659 | H     | 3.713118              | -1.798675 | -5.990789 |
| H     | 2.105979              | -0.293888 | -7.416651 | H     | -1.253307             | -0.627914 | -3.630040 |

$\sigma$ -7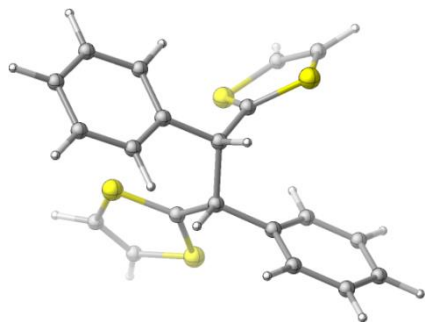

#p m062x/def2svp opt freq empiricaldispersion=gd3  
nosymm geom=connectivity

Charge = 2, Multiplicity = 1, Point group = C1

Electronic Energy = -2362.466199 Hartree

Number of imaginary frequencies = 0

Sum of electronic and zero-point Energies = -2362.160133 Hartree

Sum of electronic and thermal Energies = -2362.139586 Hartree

Sum of electronic and thermal Enthalpies = -2362.138642 Hartree

Sum of electronic and thermal Free Energies = -2362.212709 Hartree

| Cartesian Coordinates |           |           |           | Cartesian Coordinates |           |           |           |
|-----------------------|-----------|-----------|-----------|-----------------------|-----------|-----------|-----------|
| Atoms                 | X         | Y         | Z         | Atoms                 | X         | Y         | Z         |
| C                     | 1.284036  | 2.440890  | -2.212511 | C                     | 1.438690  | 3.690639  | -2.817943 |
| C                     | 0.483257  | 4.161859  | -3.713576 | C                     | -0.651305 | 3.391829  | -3.981088 |
| C                     | -0.807783 | 2.148111  | -3.377826 | C                     | 0.173470  | 1.644862  | -2.509084 |
| C                     | 0.958672  | -0.233670 | -0.943499 | C                     | 2.003368  | -1.212060 | 1.154337  |
| C                     | 3.021362  | -1.101514 | 0.266165  | S                     | 0.467228  | -0.696232 | 0.592722  |
| S                     | 2.602714  | -0.447183 | -1.267039 | C                     | -0.053854 | 0.239783  | -1.951785 |
| H                     | 2.041364  | 2.126504  | -1.495147 | H                     | 2.308996  | 4.300884  | -2.573953 |
| H                     | 0.606919  | 5.137525  | -4.184936 | H                     | -1.423566 | 3.767532  | -4.653407 |
| H                     | -1.717574 | 1.577575  | -3.581831 | H                     | 2.093884  | -1.589954 | 2.175208  |
| H                     | 4.062458  | -1.370614 | 0.457233  | H                     | -1.017326 | 0.248879  | -1.416759 |
| C                     | -2.070400 | -2.476267 | -2.417171 | C                     | -2.509660 | -3.665735 | -1.835994 |
| C                     | -1.585713 | -4.576406 | -1.327157 | C                     | -0.220337 | -4.294873 | -1.398100 |
| C                     | 0.219133  | -3.103761 | -1.972004 | C                     | -0.704576 | -2.183659 | -2.493184 |
| C                     | 0.783960  | -0.934005 | -4.145292 | C                     | 2.420525  | -0.477151 | -6.039197 |
| C                     | 2.205091  | -1.814355 | -6.064462 | S                     | 1.563578  | 0.402935  | -4.838812 |
| S                     | 1.125062  | -2.417963 | -4.878193 | C                     | -0.289109 | -0.841357 | -3.075795 |
| H                     | -2.804455 | -1.773759 | -2.820460 | H                     | -3.577299 | -3.883029 | -1.790064 |
| H                     | -1.927850 | -5.510937 | -0.880975 | H                     | 0.505528  | -5.010715 | -1.010249 |
| H                     | 1.294706  | -2.912475 | -2.023561 | H                     | 3.078320  | 0.072393  | -6.716202 |
| H                     | 2.660176  | -2.518090 | -6.764915 | H                     | -1.164188 | -0.456210 | -3.625301 |

$\sigma$ -8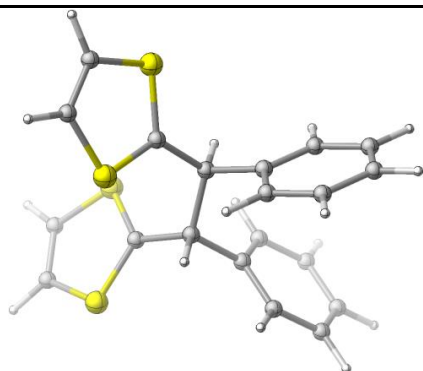

#p m062x/def2svp opt freq empiricaldispersion=gd3  
nosymm geom=connectivity

Charge = 2, Multiplicity = 1, Point group = C1

Electronic Energy = -2362.464768 Hartree

Number of imaginary frequencies = 0

Sum of electronic and zero-point Energies = -2362.159714 Hartree

Sum of electronic and thermal Energies = -2362.138787 Hartree

Sum of electronic and thermal Enthalpies = -2362.137842 Hartree

Sum of electronic and thermal Free Energies = -2362.213431 Hartree

| Cartesian Coordinates |           |           |           | Cartesian Coordinates |           |           |           |
|-----------------------|-----------|-----------|-----------|-----------------------|-----------|-----------|-----------|
| Atoms                 | X         | Y         | Z         | Atoms                 | X         | Y         | Z         |
| C                     | 1.433000  | -0.209492 | -0.300290 | C                     | 2.648847  | -0.236033 | 0.378930  |
| C                     | 3.783113  | 0.336519  | -0.198968 | C                     | 3.701447  | 0.934149  | -1.456124 |
| C                     | 2.487049  | 0.961019  | -2.140482 | C                     | 1.353049  | 0.384292  | -1.564388 |
| C                     | -1.017376 | 1.052012  | -1.537904 | C                     | -2.355930 | 2.821068  | -0.296937 |
| C                     | -2.853306 | 1.636313  | 0.128460  | S                     | -1.082151 | 2.734143  | -1.448568 |
| S                     | -2.125023 | 0.237589  | -0.560221 | C                     | 0.044805  | 0.357024  | -2.355028 |
| H                     | 0.554564  | -0.660001 | 0.171881  | H                     | 2.710874  | -0.700765 | 1.363428  |
| H                     | 4.733792  | 0.318136  | 0.335078  | H                     | 4.587455  | 1.379000  | -1.910285 |
| H                     | 2.432864  | 1.415404  | -3.132596 | H                     | -2.698161 | 3.804620  | 0.033259  |
| H                     | -3.657021 | 1.507367  | 0.856489  | H                     | 0.204583  | 0.957302  | -3.266588 |
| C                     | 1.604816  | -2.749579 | -2.911888 | C                     | 2.719966  | -3.285563 | -3.554542 |
| C                     | 3.105967  | -2.803450 | -4.804652 | C                     | 2.376438  | -1.783288 | -5.417181 |
| C                     | 1.260290  | -1.246344 | -4.779658 | C                     | 0.877369  | -1.725621 | -3.522440 |
| C                     | -1.535292 | -1.238619 | -3.629968 | C                     | -3.499571 | -2.211635 | -4.916807 |
| C                     | -3.382224 | -0.937457 | -5.358069 | S                     | -2.364734 | -2.703357 | -3.722340 |
| S                     | -2.112955 | -0.020644 | -4.644169 | C                     | -0.299206 | -1.097660 | -2.775057 |
| H                     | 1.317026  | -3.119492 | -1.924963 | H                     | 3.290765  | -4.080388 | -3.073320 |
| H                     | 3.977627  | -3.225339 | -5.306221 | H                     | 2.675437  | -1.407940 | -6.396361 |
| H                     | 0.699512  | -0.450140 | -5.278748 | H                     | -4.246147 | -2.932156 | -5.258885 |
| H                     | -4.013861 | -0.464057 | -6.112729 | H                     | -0.460192 | -1.696715 | -1.862946 |

$\sigma$ -9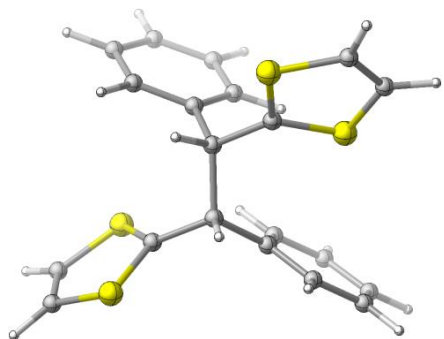

```
#p m062x/def2svp opt freq empiricaldispersion=gd3
nosymm geom=connectivity
```

Charge = 2, Multiplicity = 1, Point group = C1

Electronic Energy = -2362.471586 Hartree

Number of imaginary frequencies = 0

Sum of electronic and zero-point Energies = -2362.165049 Hartree

Sum of electronic and thermal Energies = -2362.144576 Hartree

Sum of electronic and thermal Enthalpies = -2362.143632 Hartree

Sum of electronic and thermal Free Energies = -2362.217021 Hartree

| Atoms | Cartesian Coordinates |           |           | Atom<br>s | Cartesian Coordinates |           |           |
|-------|-----------------------|-----------|-----------|-----------|-----------------------|-----------|-----------|
|       | X                     | Y         | Z         |           | X                     | Y         | Z         |
| C     | 2.099625              | 0.655148  | -2.128004 | C         | 3.260276              | 1.335794  | -2.493596 |
| C     | 3.178101              | 2.545447  | -3.185219 | C         | 1.930231              | 3.083209  | -3.499579 |
| C     | 0.769192              | 2.399920  | -3.142549 | C         | 0.843889              | 1.169484  | -2.474876 |
| C     | -0.580891             | 0.211592  | -0.670364 | C         | -1.079888             | 0.616044  | 1.792024  |
| C     | -0.306348             | -0.496032 | 1.752022  | S         | -1.431437             | 1.322075  | 0.271110  |
| S     | 0.180758              | -1.023653 | 0.192029  | C         | -0.466597             | 0.451285  | -2.160925 |
| H     | 2.192881              | -0.276292 | -1.566314 | H         | 4.234310              | 0.926962  | -2.222354 |
| H     | 4.088754              | 3.079206  | -3.460117 | H         | 1.858675              | 4.041063  | -4.016299 |
| H     | -0.204602             | 2.829234  | -3.393602 | H         | -1.484672             | 1.077478  | 2.695257  |
| H     | 0.009595              | -1.077516 | 2.620733  | H         | -1.263362             | 1.172706  | -2.398997 |
| C     | -0.903517             | -3.115710 | -1.994632 | C         | -0.324741             | -4.315250 | -1.584128 |
| C     | 1.029963              | -4.549826 | -1.818569 | C         | 1.796958              | -3.592250 | -2.484195 |
| C     | 1.217542              | -2.395340 | -2.903355 | C         | -0.132794             | -2.136283 | -2.636504 |
| C     | -0.699507             | -0.588187 | -4.502933 | C         | 0.054442              | -0.188714 | -6.893625 |
| C     | -1.195302             | -0.702795 | -6.996143 | S         | 0.659290              | 0.018730  | -5.299721 |
| S     | -1.960937             | -1.076047 | -5.509654 | C         | -0.819491             | -0.825131 | -3.012321 |
| H     | -1.966242             | -2.940616 | -1.805938 | H         | -0.935656             | -5.070552 | -1.088251 |
| H     | 1.485366              | -5.488955 | -1.501739 | H         | 2.849874              | -3.784996 | -2.693241 |
| H     | 1.834632              | -1.674706 | -3.443364 | H         | 0.684905              | 0.111801  | -7.733160 |
| H     | -1.732946             | -0.887128 | -7.928643 | H         | -1.892825             | -0.990974 | -2.832062 |

$\sigma$ -10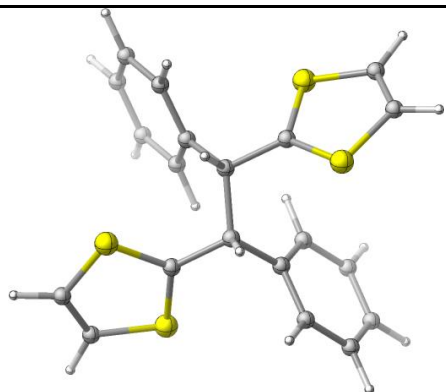

#p m062x/def2svp opt freq empiricaldispersion=gd3  
nosymm geom=connectivity

Charge = 2, Multiplicity = 1, Point group = C1

Electronic Energy = -2362.469365 Hartree

Number of imaginary frequencies = 0

Sum of electronic and zero-point Energies = -2362.163159 Hartree

Sum of electronic and thermal Energies = -2362.142640 Hartree

Sum of electronic and thermal Enthalpies = -2362.141695 Hartree

Sum of electronic and thermal Free Energies = -2362.214950 Hartree

| Atoms | Cartesian Coordinates |           |           | Atom<br>s | Cartesian Coordinates |           |           |
|-------|-----------------------|-----------|-----------|-----------|-----------------------|-----------|-----------|
|       | X                     | Y         | Z         |           | X                     | Y         | Z         |
| C     | 1.856468              | 0.735394  | -3.250648 | C         | 2.891242              | 1.587195  | -3.637587 |
| C     | 2.760663              | 2.967457  | -3.486844 | C         | 1.583700              | 3.499556  | -2.960671 |
| C     | 0.545804              | 2.650735  | -2.580980 | C         | 0.677132              | 1.260787  | -2.707656 |
| C     | -0.492151             | 0.219436  | -0.732776 | C         | 0.018878              | 0.402782  | 1.742672  |
| C     | -1.048293             | -0.427990 | 1.660118  | S         | 0.618634              | 1.013640  | 0.254380  |
| S     | -1.618740             | -0.742197 | 0.072205  | C         | -0.494377             | 0.403105  | -2.239590 |
| H     | 1.980903              | -0.339317 | -3.390711 | H         | 3.805720              | 1.167578  | -4.058403 |
| H     | 3.573372              | 3.629371  | -3.788239 | H         | 1.467374              | 4.578743  | -2.854967 |
| H     | -0.378601             | 3.081125  | -2.183977 | H         | 0.508342              | 0.709244  | 2.669622  |
| H     | -1.555502             | -0.900928 | 2.503721  | H         | -1.399359             | 1.011069  | -2.426779 |
| C     | -0.760912             | -3.430636 | -2.580289 | C         | -0.203607             | -4.621952 | -2.119738 |
| C     | 1.030956              | -4.607657 | -1.471007 | C         | 1.699948              | -3.399090 | -1.279425 |
| C     | 1.147492              | -2.206514 | -1.747038 | C         | -0.084864             | -2.214037 | -2.412438 |
| C     | -0.526847             | -0.826517 | -4.469441 | C         | 0.097531              | -1.257028 | -6.887534 |
| C     | -0.532792             | -0.057669 | -6.890912 | S         | 0.244863              | -2.029727 | -5.361498 |
| S     | -1.071590             | 0.497908  | -5.359000 | C         | -0.750358             | -0.961560 | -2.974088 |
| H     | -1.737402             | -3.452869 | -3.073600 | H         | -0.740717             | -5.560872 | -2.258657 |
| H     | 1.467976              | -5.537931 | -1.106227 | H         | 2.660600              | -3.382082 | -0.763381 |
| H     | 1.686806              | -1.274291 | -1.573488 | H         | 0.503021              | -1.757999 | -7.769199 |
| H     | -0.715270             | 0.564938  | -7.769364 | H         | -1.838539             | -1.140976 | -2.888366 |



$\pi$ -8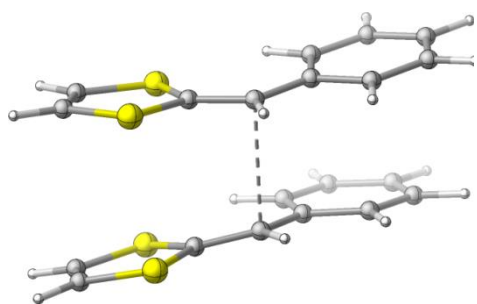

```
#p m062x/def2svp opt freq
empiricaldispersion=gd3 nosymm geom=connecti
vity
```

Charge = 2, Multiplicity = 1, Point group = C1  
 Electronic Energy = -2362.431983 Hartree  
 Number of imaginary frequencies = 0  
 Sum of electronic and zero-point Energies = -2362.129015 Hartree  
 Sum of electronic and thermal Energies = -2362.107528 Hartree  
 Sum of electronic and thermal Enthalpies = -2362.106583 Hartree  
 Sum of electronic and thermal Free Energies = -2362.180847 Hartree

| Cartesian Coordinates |           |           |           | Cartesian Coordinates |           |           |           |
|-----------------------|-----------|-----------|-----------|-----------------------|-----------|-----------|-----------|
| Atoms                 | X         | Y         | Z         | Atoms                 | X         | Y         | Z         |
| C                     | -1.186993 | -1.888185 | 1.020714  | C                     | -2.394383 | -2.260101 | 1.587054  |
| C                     | -3.558998 | -2.303625 | 0.806944  | C                     | -3.516080 | -1.962646 | -0.548771 |
| C                     | -2.313275 | -1.590400 | -1.124970 | C                     | -1.112691 | -1.562983 | -0.363280 |
| C                     | 1.419985  | -1.303546 | -0.693930 | C                     | 3.986637  | -1.249988 | -0.807854 |
| C                     | 3.690478  | -1.671045 | 0.443385  | S                     | 2.652749  | -0.891874 | -1.828284 |
| S                     | 2.020813  | -1.817656 | 0.839436  | C                     | 0.074232  | -1.208950 | -1.072512 |
| C                     | -2.703522 | 1.623541  | -1.532512 | C                     | -4.068281 | 1.557339  | -1.317060 |
| C                     | -4.550849 | 1.306667  | -0.026751 | C                     | -3.663671 | 1.125558  | 1.044827  |
| C                     | -2.297407 | 1.202885  | 0.840721  | C                     | -1.781456 | 1.461204  | -0.457089 |
| C                     | 0.738116  | 1.652233  | 0.031755  | C                     | 3.165610  | 2.081286  | 0.767199  |
| C                     | 2.509755  | 1.715212  | 1.889076  | S                     | 2.236767  | 2.139119  | -0.683962 |
| S                     | 0.835527  | 1.326199  | 1.724733  | C                     | -0.403096 | 1.606647  | -0.781788 |
| H                     | -0.307643 | -1.867641 | 1.662754  | H                     | -2.437487 | -2.529128 | 2.642926  |
| H                     | -4.500920 | -2.618703 | 1.259714  | H                     | -4.421787 | -2.006474 | -1.154825 |
| H                     | -2.272194 | -1.356533 | -2.190863 | H                     | 4.995326  | -1.144618 | -1.212379 |
| H                     | 4.426619  | -1.960718 | 1.196095  | H                     | -0.075442 | -0.957234 | -2.127509 |
| H                     | -2.321983 | 1.833867  | -2.534414 | H                     | -4.762488 | 1.709123  | -2.143997 |
| H                     | -5.627282 | 1.265810  | 0.150679  | H                     | -4.053186 | 0.943508  | 2.047064  |
| H                     | -1.642562 | 1.083732  | 1.702340  | H                     | 4.214125  | 2.382554  | 0.726200  |
| H                     | 2.952065  | 1.666313  | 2.886128  | H                     | -0.204001 | 1.851239  | -1.831279 |

### TS-7

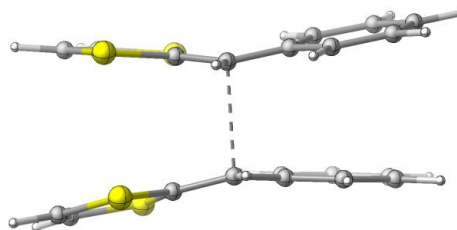

```
#p m062x/def2svp opt=(calcfc,ts, noeigen) freq
empiricaldispersion=gd3 nosymm geom=connectivity
```

Charge = 2, Multiplicity = 1, Point group = C1

Electronic Energy = -2362.430980 Hartree

Number of imaginary frequencies = 1,  $\nu_i = -76.82$

Sum of electronic and zero-point Energies = -2362.127974 Hartree

Sum of electronic and thermal Energies = -2362.107358 Hartree

Sum of electronic and thermal Enthalpies = -2362.106414 Hartree

Sum of electronic and thermal Free Energies = -2362.177725 Hartree

| Atoms | Cartesian Coordinates |           |           | Atom<br>s | Cartesian Coordinates |           |           |
|-------|-----------------------|-----------|-----------|-----------|-----------------------|-----------|-----------|
|       | X                     | Y         | Z         |           | X                     | Y         | Z         |
| C     | -0.906813             | -1.670464 | 1.387709  | C         | -2.019165             | -2.043515 | 2.129104  |
| C     | -3.229271             | -2.337278 | 1.489561  | C         | -3.329969             | -2.253921 | 0.098146  |
| C     | -2.226045             | -1.874650 | -0.649949 | C         | -0.988295             | -1.581573 | -0.025137 |
| C     | 1.478487              | -1.223012 | -0.679720 | C         | 4.009512              | -1.200535 | -1.118249 |
| C     | 3.877388              | -1.426452 | 0.206096  | S         | 2.546323              | -1.000497 | -2.003293 |
| S     | 2.264050              | -1.493577 | 0.817981  | C         | 0.076960              | -1.162585 | -0.896287 |
| C     | -2.515539             | 1.118206  | -1.973104 | C         | -3.900627             | 1.091918  | -1.940225 |
| C     | -4.564841             | 1.136561  | -0.709799 | C         | -3.837581             | 1.209368  | 0.483795  |
| C     | -2.451416             | 1.245254  | 0.457642  | C         | -1.759327             | 1.203847  | -0.775803 |
| C     | 0.659169              | 1.584598  | 0.031252  | C         | 2.893761              | 2.361791  | 1.033617  |
| C     | 2.099464              | 2.095134  | 2.091733  | S         | 2.195531              | 2.118984  | -0.523114 |
| S     | 0.509351              | 1.524897  | 1.736368  | C         | -0.328826             | 1.224783  | -0.924297 |
| H     | 0.018789              | -1.465211 | 1.924487  | H         | -1.944528             | -2.124133 | 3.213985  |
| H     | -4.091855             | -2.648424 | 2.081067  | H         | -4.268331             | -2.499252 | -0.400424 |
| H     | -2.299243             | -1.829963 | -1.738325 | H         | 4.956091              | -1.156270 | -1.660986 |
| H     | 4.701106              | -1.599334 | 0.901730  | H         | -0.190964             | -1.139196 | -1.957190 |
| H     | -1.998089             | 1.098347  | -2.935654 | H         | -4.468702             | 1.047741  | -2.869874 |
| H     | -5.655714             | 1.126325  | -0.680621 | H         | -4.361438             | 1.254871  | 1.439043  |
| H     | -1.928468             | 1.320683  | 1.409572  | H         | 3.911563              | 2.752658  | 1.092955  |
| H     | 2.376577              | 2.227552  | 3.139560  | H         | 0.020939              | 1.319542  | -1.958202 |

σ-11

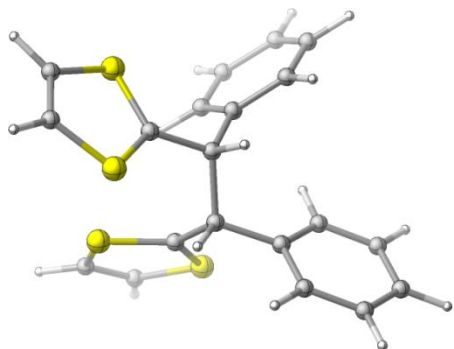

```
#p m062x/def2svp opt freq
empiricaldispersion=gd3 nosymm geom=connecti
vity
Charge = 2, Multiplicity = 1, Point group = C1
Electronic Energy = -2362.464684 Hartree
Number of imaginary frequencies = 0
Sum of electronic and zero-point Energies = -2362.158867 Hartree
Sum of electronic and thermal Energies = -2362.138281 Hartree
Sum of electronic and thermal Enthalpies = -2362.137337 Hartree
Sum of electronic and thermal Free Energies = -2362.211223 Hartree
```

| Cartesian Coordinates |           |           |           | Cartesian Coordinates |           |           |           |
|-----------------------|-----------|-----------|-----------|-----------------------|-----------|-----------|-----------|
| Atoms                 | X         | Y         | Z         | Atoms                 | X         | Y         | Z         |
| C                     | -0.415738 | -0.784086 | 2.235748  | C                     | -0.811320 | -1.105491 | 3.533491  |
| C                     | -1.975478 | -1.841446 | 3.753968  | C                     | -2.746625 | -2.263177 | 2.672109  |
| C                     | -2.352748 | -1.950329 | 1.372329  | C                     | -1.189359 | -1.207452 | 1.143877  |
| C                     | 0.447591  | -1.642292 | -0.722625 | C                     | 2.282809  | -2.775985 | -2.085482 |
| C                     | 2.641646  | -2.914809 | -0.786697 | S                     | 0.799862  | -1.949047 | -2.347806 |
| S                     | 1.567553  | -2.249389 | 0.376615  | C                     | -0.803700 | -0.900619 | -0.296725 |
| C                     | 0.146691  | 2.308374  | 1.088446  | C                     | 1.190782  | 3.012928  | 1.686267  |
| C                     | 2.501501  | 2.822365  | 1.250644  | C                     | 2.767911  | 1.932839  | 0.208200  |
| C                     | 1.725744  | 1.227548  | -0.390391 | C                     | 0.405429  | 1.404070  | 0.052707  |
| C                     | -0.939898 | 1.025480  | -2.031135 | C                     | -1.842477 | 1.298112  | -4.399269 |
| C                     | -0.946194 | 2.299544  | -4.227496 | S                     | -2.056397 | 0.261680  | -3.046602 |
| S                     | -0.162328 | 2.363007  | -2.700255 | C                     | -0.753578 | 0.650703  | -0.572618 |
| H                     | 0.494089  | -0.197720 | 2.093776  | H                     | -0.206989 | -0.772642 | 4.378046  |
| H                     | -2.281361 | -2.086881 | 4.771584  | H                     | -3.657002 | -2.840123 | 2.837549  |
| H                     | -2.962073 | -2.291591 | 0.531586  | H                     | 2.835776  | -3.158356 | -2.946100 |
| H                     | 3.539134  | -3.428376 | -0.434272 | H                     | -1.615028 | -1.312241 | -0.920189 |
| H                     | -0.876447 | 2.453262  | 1.443661  | H                     | 0.977598  | 3.713680  | 2.494170  |
| H                     | 3.318110  | 3.374597  | 1.717274  | H                     | 3.790952  | 1.795339  | -0.143898 |
| H                     | 1.954382  | 0.555976  | -1.223376 | H                     | -2.425214 | 1.109164  | -5.303702 |
| H                     | -0.690774 | 3.050454  | -4.978880 | H                     | -1.676628 | 1.012936  | -0.085869 |

$\sigma$ -12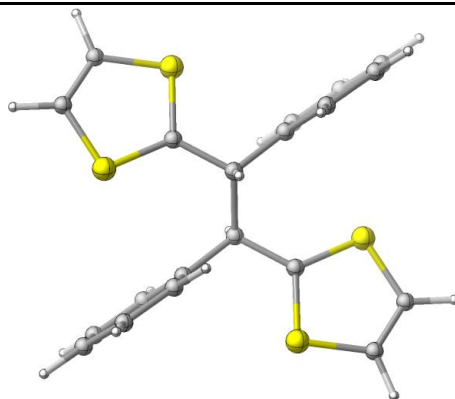

```
#p m062x/def2svp opt freq
empiricaldispersion=gd3 nosymm geom=connecti
vity
```

Charge = 2, Multiplicity = 1, Point group = C1

Electronic Energy = -2362.479811 Hartree

Number of imaginary frequencies = 0

Sum of electronic and zero-point Energies = -2362.173714 Hartree

Sum of electronic and thermal Energies = -2362.153328 Hartree

Sum of electronic and thermal Enthalpies = -2362.152384 Hartree

Sum of electronic and thermal Free Energies = -2362.225067 Hartree

| Cartesian Coordinates |           |           |           | Cartesian Coordinates |           |           |           |
|-----------------------|-----------|-----------|-----------|-----------------------|-----------|-----------|-----------|
| Atoms                 | X         | Y         | Z         | Atoms                 | X         | Y         | Z         |
| C                     | -1.694284 | -0.990593 | 1.876837  | C                     | -2.878051 | -1.521721 | 2.383621  |
| C                     | -3.592973 | -2.466064 | 1.642455  | C                     | -3.115873 | -2.888565 | 0.401809  |
| C                     | -1.929719 | -2.358477 | -0.107604 | C                     | -1.218999 | -1.399589 | 0.621157  |
| C                     | 1.274762  | -1.279534 | 0.787010  | C                     | 3.613252  | -1.873573 | 1.592131  |
| C                     | 2.779455  | -2.702159 | 2.266848  | S                     | 2.866961  | -0.782366 | 0.499515  |
| S                     | 1.113341  | -2.525818 | 1.917849  | C                     | 0.039678  | -0.782059 | 0.038215  |
| C                     | 1.929638  | 2.358603  | 0.107506  | C                     | 3.115781  | 2.888724  | -0.401899 |
| C                     | 3.592958  | 2.466156  | -1.642491 | C                     | 2.878121  | 1.521712  | -2.383616 |
| C                     | 1.694368  | 0.990549  | -1.876841 | C                     | 1.219011  | 1.399610  | -0.621207 |
| C                     | -1.274728 | 1.279518  | -0.787057 | C                     | -3.613226 | 1.873545  | -1.592152 |
| C                     | -2.779415 | 2.701948  | -2.267078 | S                     | -2.866937 | 0.782495  | -0.499381 |
| S                     | -1.113291 | 2.525552  | -1.918164 | C                     | -0.039651 | 0.782057  | -0.038258 |
| H                     | -1.145425 | -0.254112 | 2.471953  | H                     | -3.245145 | -1.199246 | 3.358745  |
| H                     | -4.521064 | -2.879724 | 2.039247  | H                     | -3.667178 | -3.634085 | -0.172501 |
| H                     | -1.564338 | -2.688241 | -1.083524 | H                     | 4.700128  | -1.844962 | 1.695498  |
| H                     | 3.085184  | -3.451634 | 2.999938  | H                     | 0.156829  | -1.155441 | -0.993464 |
| H                     | 1.564200  | 2.688423  | 1.083385  | H                     | 3.667016  | 3.634320  | 0.172380  |
| H                     | 4.521038  | 2.879844  | -2.039279 | H                     | 3.245274  | 1.199187  | -3.358702 |
| H                     | 1.145586  | 0.253980  | -2.471918 | H                     | -4.700112 | 1.844998  | -1.695436 |
| H                     | -3.085140 | 3.451310  | -3.000286 | H                     | -0.156829 | 1.155437  | 0.993420  |

## 2. Optimized geometries and energies of Ph-DTF dimers in CH<sub>2</sub>Cl<sub>2</sub>

$\pi$ -1

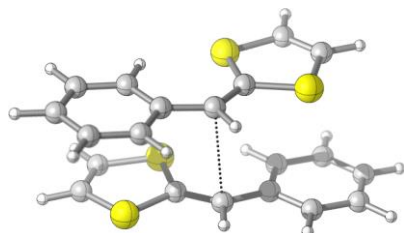

```
#p m062x/def2svp nosymm opt freq
empiricaldispersion=gd3 scrf=(smd,sol
vent=dichloromethane) geom=connectivity
```

Charge = 1, Multiplicity = 2, Point group = C1

Electronic Energy = -2362.874570 Hartree

$\hat{S}^2 = 0.7602$

Number of imaginary frequencies = 0

Sum of electronic and zero-point Energies = -2362.572796 Hartree

Sum of electronic and thermal Energies = -2362.550992 Hartree

Sum of electronic and thermal Enthalpies = -2362.550048 Hartree

Sum of electronic and thermal Free Energies = -2362.625332 Hartree

| Atoms | Cartesian Coordinates |           |           | Atoms | Cartesian Coordinates |           |           |
|-------|-----------------------|-----------|-----------|-------|-----------------------|-----------|-----------|
|       | X                     | Y         | Z         |       | X                     | Y         | Z         |
| C     | -2.347776             | 1.320995  | -0.474093 | C     | -3.723128             | 1.179072  | -0.625262 |
| C     | -4.557875             | 1.091009  | 0.491842  | C     | -4.004516             | 1.146802  | 1.772163  |
| C     | -2.630410             | 1.283714  | 1.929552  | C     | -1.769492             | 1.377478  | 0.812021  |
| C     | 0.714254              | 1.683977  | 0.246841  | C     | 3.124834              | 2.130819  | -0.595536 |
| C     | 2.383359              | 2.005079  | -1.709939 | S     | 2.307645              | 1.945351  | 0.915467  |
| S     | 0.696714              | 1.660004  | -1.497495 | C     | -0.354851             | 1.519812  | 1.092981  |
| H     | -1.743992             | 1.395286  | -1.376894 | H     | -4.148416             | 1.138878  | -1.629471 |
| H     | -5.636085             | 0.983623  | 0.362678  | H     | -4.646418             | 1.081483  | 2.651971  |
| H     | -2.197870             | 1.324720  | 2.931436  | H     | 4.195340              | 2.341972  | -0.579804 |
| H     | 2.761036              | 2.095137  | -2.729470 | H     | -0.107540             | 1.559897  | 2.158599  |
| C     | 2.630421              | -1.285487 | 1.928386  | C     | 4.004531              | -1.148487 | 1.771115  |
| C     | 4.557891              | -1.091565 | 0.490844  | C     | 3.723138              | -1.178569 | -0.626339 |
| C     | 2.347780              | -1.320558 | -0.475295 | C     | 1.769500              | -1.378197 | 0.810768  |
| C     | -0.714257             | -1.684144 | 0.245320  | C     | -2.383388             | -2.003466 | -1.711718 |
| C     | -3.124834             | -2.130295 | -0.597415 | S     | -0.696761             | -1.658488 | -1.498990 |
| S     | -2.307616             | -1.946218 | 0.913738  | C     | 0.354858              | -1.520745 | 1.091597  |
| H     | 2.197887              | -1.327407 | 2.930236  | H     | 4.646440              | -1.083997 | 2.650981  |
| H     | 5.636106              | -0.984112 | 0.361777  | H     | 4.148422              | -1.137465 | -1.630512 |
| H     | 1.743982              | -1.393961 | -1.378159 | H     | -2.761082             | -2.092606 | -2.731322 |
| H     | -4.195328             | -2.341522 | -0.581861 | H     | 0.107547              | -1.561773 | 2.157178  |

### TS-1

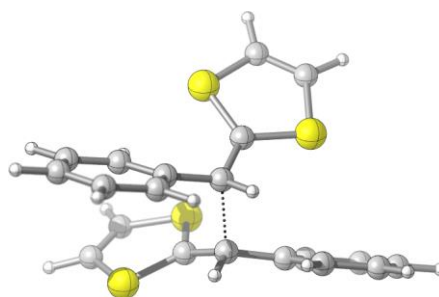

```
#p m062x/def2svp opt=(calcfc,ts,noeigen) nosymm
freq empiricaldispersi on=gd3
scrf=(smd,solvent=dichloromethane)
geom=connectivity
```

Charge = 1, Multiplicity = 2, Point group = C1

Electronic Energy = -2362.854742 Hartree

$S^2 = 0.7651$

Number of imaginary frequencies = 1,  $\nu_i = -312.24$

Sum of electronic and zero-point Energies = -2362.551979 Hartree

Sum of electronic and thermal Energies = -2362.531180 Hartree

Sum of electronic and thermal Enthalpies = -2362.530235 Hartree

Sum of electronic and thermal Free Energies = -2362.604053 Hartree

| Cartesian Coordinates |           |           |           | Cartesian Coordinates |           |           |           |
|-----------------------|-----------|-----------|-----------|-----------------------|-----------|-----------|-----------|
| Atoms                 | X         | Y         | Z         | Atoms                 | X         | Y         | Z         |
| C                     | -2.583791 | 0.678605  | 0.121384  | C                     | -3.950943 | 0.721165  | 0.392467  |
| C                     | -4.402878 | 0.865857  | 1.703271  | C                     | -3.480154 | 0.956943  | 2.746872  |
| C                     | -2.114855 | 0.916626  | 2.477333  | C                     | -1.646484 | 0.794563  | 1.159968  |
| C                     | 0.434097  | 1.512544  | -0.096043 | C                     | 2.165074  | 2.786148  | -1.522040 |
| C                     | 0.976764  | 3.057248  | -2.087938 | S                     | 2.151047  | 1.756430  | -0.129139 |
| S                     | -0.423038 | 2.358990  | -1.345508 | C                     | -0.176128 | 0.748472  | 0.941309  |
| H                     | -2.261728 | 0.523823  | -0.911794 | H                     | -4.664623 | 0.630351  | -0.427994 |
| H                     | -5.473072 | 0.900003  | 1.913299  | H                     | -3.825334 | 1.061912  | 3.776636  |
| H                     | -1.394250 | 0.989535  | 3.295585  | H                     | 3.126581  | 3.161309  | -1.875186 |
| H                     | 0.829631  | 3.686818  | -2.966848 | H                     | 0.377610  | 0.823465  | 1.880970  |
| C                     | 2.339671  | -0.809535 | 2.149124  | C                     | 3.717843  | -0.759411 | 2.328078  |
| C                     | 4.572786  | -1.112342 | 1.281401  | C                     | 4.034212  | -1.539521 | 0.069892  |
| C                     | 2.651438  | -1.586227 | -0.111947 | C                     | 1.783817  | -1.198419 | 0.917593  |
| C                     | -0.400974 | -1.649251 | -0.348287 | C                     | -1.459059 | -1.817519 | -2.686439 |
| C                     | -2.341466 | -2.401311 | -1.856099 | S                     | 0.008442  | -1.222936 | -1.970985 |
| S                     | -1.895443 | -2.488205 | -0.186278 | C                     | 0.296131  | -1.173247 | 0.793929  |
| H                     | 1.678761  | -0.546127 | 2.979128  | H                     | 4.127163  | -0.449096 | 3.290705  |
| H                     | 5.654450  | -1.070719 | 1.418199  | H                     | 4.691010  | -1.844355 | -0.746289 |
| H                     | 2.270041  | -1.952200 | -1.064918 | H                     | -1.582925 | -1.716013 | -3.765575 |
| H                     | -3.292357 | -2.839181 | -2.163347 | H                     | -0.195563 | -1.470018 | 1.728248  |

**σ-1**

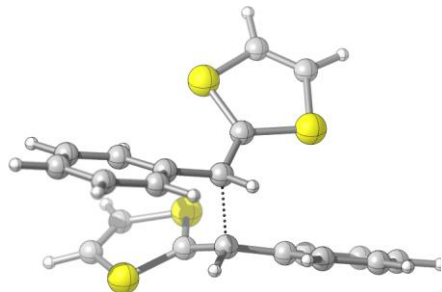

#p m062x/def2svp nosymm opt freq  
empiricaldispersion=gd3 scrf=(smd, sol  
vent=dichloromethane) geom=connectivity

Charge = 1, Multiplicity = 2, Point group = C1

Electronic Energy = -2362.862064 Hartree

$S^2 = 0.7588$

Number of imaginary frequencies = 0

Sum of electronic and zero-point Energies = -2362.558365 Hartree

Sum of electronic and thermal Energies = -2362.537275 Hartree

Sum of electronic and thermal Enthalpies = -2362.536331 Hartree

Sum of electronic and thermal Free Energies = -2362.611182 Hartree

| Cartesian Coordinates |           |           |           | Cartesian Coordinates |           |           |           |
|-----------------------|-----------|-----------|-----------|-----------------------|-----------|-----------|-----------|
| Atoms                 | X         | Y         | Z         | Atoms                 | X         | Y         | Z         |
| C                     | -2.640275 | 0.200800  | 0.141973  | C                     | -4.007486 | 0.183933  | 0.414443  |
| C                     | -4.478088 | 0.552907  | 1.674731  | C                     | -3.575481 | 0.944361  | 2.662925  |
| C                     | -2.208200 | 0.963756  | 2.390550  | C                     | -1.725824 | 0.592049  | 1.130521  |
| C                     | 0.221254  | 1.491572  | -0.203604 | C                     | 1.611178  | 2.924974  | -1.801375 |
| C                     | 0.333669  | 3.302398  | -2.004226 | S                     | 1.869335  | 1.715637  | -0.595855 |
| S                     | -0.855457 | 2.524459  | -1.028397 | C                     | -0.225895 | 0.591895  | 0.903330  |
| H                     | -2.297611 | -0.088797 | -0.854023 | H                     | -4.706942 | -0.122643 | -0.364808 |
| H                     | -5.548642 | 0.536894  | 1.885385  | H                     | -3.934664 | 1.237497  | 3.650659  |
| H                     | -1.502176 | 1.270467  | 3.166235  | H                     | 2.480198  | 3.321859  | -2.329087 |
| H                     | 0.004807  | 4.054789  | -2.722618 | H                     | 0.230623  | 1.009828  | 1.812826  |
| C                     | 2.424817  | -0.268403 | 2.162862  | C                     | 3.802105  | -0.205985 | 2.357752  |
| C                     | 4.668704  | -0.763385 | 1.415294  | C                     | 4.144157  | -1.402842 | 0.294556  |
| C                     | 2.762654  | -1.468236 | 0.101634  | C                     | 1.887485  | -0.881403 | 1.020964  |
| C                     | -0.128329 | -1.630960 | -0.353437 | C                     | -1.103839 | -2.063986 | -2.692774 |
| C                     | -1.706060 | -2.952210 | -1.883745 | S                     | 0.094721  | -1.025195 | -1.964013 |
| S                     | -1.222372 | -2.959194 | -0.216682 | C                     | 0.369328  | -0.893580 | 0.833188  |
| H                     | 1.761725  | 0.160016  | 2.918943  | H                     | 4.200229  | 0.275962  | 3.252165  |
| H                     | 5.748458  | -0.709935 | 1.563317  | H                     | 4.810880  | -1.858681 | -0.439242 |
| H                     | 2.374352  | -1.984001 | -0.777124 | H                     | -1.290074 | -1.967979 | -3.763113 |
| H                     | -2.450565 | -3.679217 | -2.211360 | H                     | -0.062844 | -1.373648 | 1.725187  |

$\pi$ -2

```
#p m062x/def2svp nosymm opt freq
empiricaldispersion=gd3 scrf=(smd, sol
vent=dichloromethane) geom=connectivity
```

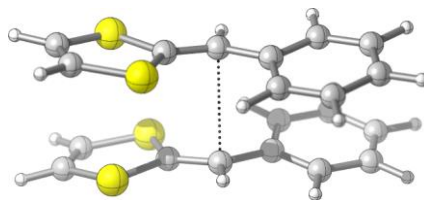

Charge = 1, Multiplicity = 2, Point group = C1

Electronic Energy = -2362.868666 Hartree

 $S^2 = 0.7585$ 

Number of imaginary frequencies = 0

Sum of electronic and zero-point Energies = -2362.567850 Hartree

Sum of electronic and thermal Energies = -2362.545620 Hartree

Sum of electronic and thermal Enthalpies = -2362.544676 Hartree

Sum of electronic and thermal Free Energies = -2362.622740 Hartree

| Atoms | Cartesian Coordinates |           |           | Atoms | Cartesian Coordinates |           |           |
|-------|-----------------------|-----------|-----------|-------|-----------------------|-----------|-----------|
|       | X                     | Y         | Z         |       | X                     | Y         | Z         |
| C     | 1.648734              | 2.334380  | 0.696729  | C     | 2.900881              | 2.756961  | 1.131847  |
| C     | 4.051273              | 2.430076  | 0.408870  | C     | 3.944550              | 1.662476  | -0.751938 |
| C     | 2.696906              | 1.228715  | -1.185618 | C     | 1.523521              | 1.569045  | -0.480480 |
| C     | -1.025958             | 1.423491  | -0.763193 | C     | -3.611287             | 1.555478  | -0.936740 |
| C     | -3.275045             | 2.455726  | 0.001849  | S     | -2.318201             | 0.654840  | -1.657468 |
| S     | -1.588941             | 2.602425  | 0.392021  | C     | 0.272651              | 1.062622  | -1.018303 |
| H     | 0.780060              | 2.586418  | 1.304993  | H     | 2.979728              | 3.343709  | 2.048265  |
| H     | 5.028920              | 2.768095  | 0.756060  | H     | 4.838327              | 1.392652  | -1.316755 |
| H     | 2.615038              | 0.619402  | -2.088601 | H     | -4.629171             | 1.361540  | -1.278507 |
| H     | -3.979094             | 3.094766  | 0.537043  | H     | 0.394290              | 0.319825  | -1.814079 |
| C     | 2.696850              | -1.228511 | 1.185609  | C     | 3.944538              | -1.662255 | 0.752035  |
| C     | 4.051373              | -2.429839 | -0.408773 | C     | 2.901051              | -2.756719 | -1.131861 |
| C     | 1.648861              | -2.334156 | -0.696848 | C     | 1.523532              | -1.568845 | 0.480364  |
| C     | -1.025980             | -1.423380 | 0.762979  | C     | -3.274972             | -2.456139 | -0.001670 |
| C     | -3.611272             | -1.555863 | 0.936869  | S     | -1.588899             | -2.602456 | -0.392127 |
| S     | -2.318279             | -0.654817 | 1.657257  | C     | 0.272611              | -1.062430 | 1.018088  |
| H     | 2.614894              | -0.619209 | 2.088590  | H     | 4.838262              | -1.392429 | 1.316935  |
| H     | 5.029055              | -2.767843 | -0.755879 | H     | 2.979988              | -3.343443 | -2.048287 |
| H     | 0.780248              | -2.586155 | -1.305213 | H     | -3.978960             | -3.095402 | -0.536679 |
| H     | -4.629146             | -1.362123 | 1.278779  | H     | 0.394197              | -0.319574 | 1.813816  |



## TS-2

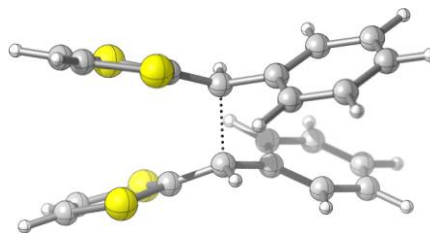

```
#p m062x/def2svp opt=(calcfc,ts,noeigen) nosymm
freq empiricaldispersi on=gd3
scrf=(smd,solvent=dichloromethane)
geom=connectivity
```

Charge = 1, Multiplicity = 2, Point group = C1

Electronic Energy = -2362.859275 Hartree

$\hat{S}^2 = 0.7635$

Number of imaginary frequencies = 1,  $\nu_i = -291.55$

Sum of electronic and zero-point Energies = -2362.556514 Hartree

Sum of electronic and thermal Energies = -2362.535674 Hartree

Sum of electronic and thermal Enthalpies = -2362.534730 Hartree

Sum of electronic and thermal Free Energies = -2362.608471 Hartree

| Cartesian Coordinates |           |           |           | Cartesian Coordinates |           |           |           |
|-----------------------|-----------|-----------|-----------|-----------------------|-----------|-----------|-----------|
| Atoms                 | X         | Y         | Z         | Atoms                 | X         | Y         | Z         |
| C                     | 1.646352  | 2.200729  | 0.897748  | C                     | 2.854785  | 2.828023  | 1.197799  |
| C                     | 3.932743  | 2.736664  | 0.316940  | C                     | 3.799418  | 2.009038  | -0.866191 |
| C                     | 2.592765  | 1.382313  | -1.168771 | C                     | 1.498706  | 1.481023  | -0.297343 |
| C                     | -1.020737 | 1.383217  | -0.625952 | C                     | -3.554192 | 1.734523  | -0.914446 |
| C                     | -3.160758 | 2.671913  | -0.034512 | S                     | -2.312734 | 0.706850  | -1.552881 |
| S                     | -1.471712 | 2.727857  | 0.359165  | C                     | 0.250230  | 0.755130  | -0.655739 |
| H                     | 0.833421  | 2.252237  | 1.625377  | H                     | 2.955628  | 3.382454  | 2.132113  |
| H                     | 4.878207  | 3.225859  | 0.556548  | H                     | 4.639992  | 1.924816  | -1.556801 |
| H                     | 2.491544  | 0.805845  | -2.090976 | H                     | -4.576762 | 1.597559  | -1.269582 |
| H                     | -3.819515 | 3.406208  | 0.431863  | H                     | 0.373834  | 0.118446  | -1.539015 |
| C                     | 2.592836  | -1.382409 | 1.168836  | C                     | 3.799496  | -2.009079 | 0.866170  |
| C                     | 3.932791  | -2.736644 | -0.317002 | C                     | 2.854796  | -2.827996 | -1.197814 |
| C                     | 1.646356  | -2.200756 | -0.897676 | C                     | 1.498737  | -1.481114 | 0.297456  |
| C                     | -1.020719 | -1.383314 | 0.626068  | C                     | -3.160816 | -2.671734 | 0.034311  |
| C                     | -3.554201 | -1.734501 | 0.914434  | S                     | -1.471765 | -2.727711 | -0.359351 |
| S                     | -2.312686 | -0.707041 | 1.553101  | C                     | 0.250262  | -0.755261 | 0.655937  |
| H                     | 2.491641  | -0.805982 | 2.091070  | H                     | 4.640101  | -1.924859 | 1.556742  |
| H                     | 4.878260  | -3.225796 | -0.556678 | H                     | 2.955611  | -3.382379 | -2.132161 |
| H                     | 0.833403  | -2.252261 | -1.625278 | H                     | -3.819617 | -3.405883 | -0.432228 |
| H                     | -4.576767 | -1.597545 | 1.269584  | H                     | 0.373882  | -0.118664 | 1.539278  |

$\sigma$ -2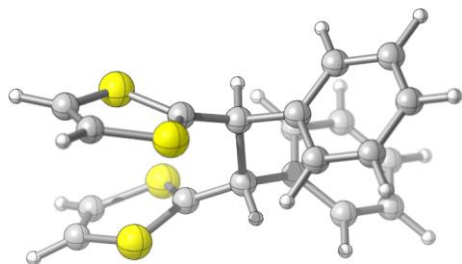

```
#p m062x/def2svp nosymm opt freq
empiricaldispersion=gd3 scrf=(smd,sol
vent=dichloromethane) geom=connectivity
```

Charge = 1, Multiplicity = 2, Point group = C1

Electronic Energy = -2362.863171 Hartree

$\hat{S}^2 = 0.7572$

Number of imaginary frequencies = 0

Sum of electronic and zero-point Energies = -2362.559273 Hartree

Sum of electronic and thermal Energies = -2362.538069 Hartree

Sum of electronic and thermal Enthalpies = -2362.537125 Hartree

Sum of electronic and thermal Free Energies = -2362.612445 Hartree

| Cartesian Coordinates |           |           |           | Cartesian Coordinates |           |           |           |
|-----------------------|-----------|-----------|-----------|-----------------------|-----------|-----------|-----------|
| Atoms                 | X         | Y         | Z         | Atoms                 | X         | Y         | Z         |
| C                     | 1.714980  | 2.041757  | 1.049024  | C                     | 2.848180  | 2.817729  | 1.292061  |
| C                     | 3.773476  | 3.045625  | 0.273644  | C                     | 3.561154  | 2.494060  | -0.989862 |
| C                     | 2.426157  | 1.722167  | -1.235288 | C                     | 1.490782  | 1.494152  | -0.220584 |
| C                     | -1.003905 | 1.382873  | -0.512284 | C                     | -3.499744 | 1.852064  | -0.819634 |
| C                     | -3.072033 | 2.746375  | 0.092568  | S                     | -2.292209 | 0.803708  | -1.488782 |
| S                     | -1.385584 | 2.726476  | 0.485229  | C                     | 0.269239  | 0.648164  | -0.515689 |
| H                     | 1.013190  | 1.861408  | 1.867557  | H                     | 3.009913  | 3.239038  | 2.285523  |
| H                     | 4.662479  | 3.648078  | 0.466977  | H                     | 4.283928  | 2.661541  | -1.789956 |
| H                     | 2.264383  | 1.286338  | -2.224013 | H                     | -4.524380 | 1.774040  | -1.185872 |
| H                     | -3.702391 | 3.497330  | 0.571889  | H                     | 0.388136  | 0.193927  | -1.510500 |
| C                     | 2.426860  | -1.721145 | 1.235251  | C                     | 3.562215  | -2.492515 | 0.989839  |
| C                     | 3.774903  | -3.043821 | -0.273720 | C                     | 2.849622  | -2.816176 | -1.292207 |
| C                     | 1.716059  | -2.040733 | -1.049180 | C                     | 1.491476  | -1.493427 | 0.220488  |
| C                     | -1.003286 | -1.383304 | 0.512168  | C                     | -3.070825 | -2.747704 | -0.092672 |
| C                     | -3.498925 | -1.853563 | 0.819511  | S                     | -1.384384 | -2.727093 | -0.485327 |
| S                     | -2.291845 | -0.804678 | 1.488654  | C                     | 0.269529  | -0.648020 | 0.515578  |
| H                     | 2.264785  | -1.285504 | 2.224008  | H                     | 4.284983  | -2.659788 | 1.789982  |
| H                     | 4.664187  | -3.645862 | -0.467042 | H                     | 3.011651  | -3.237264 | -2.285715 |
| H                     | 1.014286  | -1.860543 | -1.867764 | H                     | -3.700863 | -3.498929 | -0.571983 |
| H                     | -4.523601 | -1.775976 | 1.185725  | H                     | 0.388195  | -0.193750 | 1.510397  |

$\pi$ -3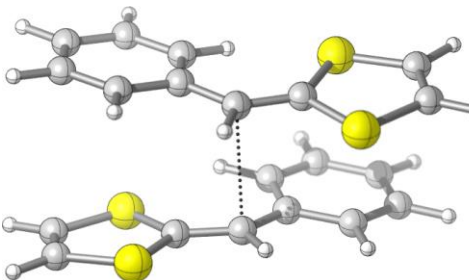

```
#p m062x/def2svp nosymm opt freq
empiricaldispersion=gd3 scrf=(smd,sol
vent=dichloromethane) geom=connectivity
```

Charge = 1, Multiplicity = 2, Point group = C1

Electronic Energy = -2362.872781 Hartree

$\bar{S}^2 = 0.7614$

Number of imaginary frequencies = 0

Sum of electronic and zero-point Energies = -2362.570901 Hartree

Sum of electronic and thermal Energies = -2362.549273 Hartree

Sum of electronic and thermal Enthalpies = -2362.548329 Hartree

Sum of electronic and thermal Free Energies = -2362.622847 Hartree

| Cartesian Coordinates |           |           |           | Cartesian Coordinates |           |           |           |
|-----------------------|-----------|-----------|-----------|-----------------------|-----------|-----------|-----------|
| Atoms                 | X         | Y         | Z         | Atoms                 | X         | Y         | Z         |
| C                     | -0.716641 | 1.610013  | -1.524748 | C                     | -1.783761 | 1.848516  | -2.388141 |
| C                     | -3.049739 | 2.151379  | -1.886911 | C                     | -3.248239 | 2.212713  | -0.504813 |
| C                     | -2.187488 | 1.982370  | 0.361934  | C                     | -0.894934 | 1.683441  | -0.125874 |
| C                     | 1.497304  | 1.315950  | 0.728022  | C                     | 4.007893  | 1.018455  | 1.304174  |
| C                     | 3.967714  | 1.172137  | -0.030126 | S                     | 2.492233  | 1.049102  | 2.139118  |
| S                     | 2.405944  | 1.385602  | -0.752169 | C                     | 0.133180  | 1.434690  | 0.867080  |
| H                     | 0.245551  | 1.352389  | -1.964839 | H                     | -1.620799 | 1.790597  | -3.465444 |
| H                     | -3.879310 | 2.338829  | -2.570491 | H                     | -4.234904 | 2.447320  | -0.101756 |
| H                     | -2.343270 | 2.046953  | 1.441109  | H                     | 4.917220  | 0.875121  | 1.889627  |
| H                     | 4.837484  | 1.171483  | -0.688820 | H                     | -0.228841 | 1.413359  | 1.899678  |
| C                     | 2.187542  | -1.982592 | 0.360396  | C                     | 3.248221  | -2.212284 | -0.506611 |
| C                     | 3.049612  | -2.149855 | -1.888648 | C                     | 1.783612  | -1.846537 | -2.389551 |
| C                     | 0.716565  | -1.608677 | -1.525891 | C                     | 0.894962  | -1.683257 | -0.127097 |
| C                     | -1.497231 | -1.316531 | 0.727015  | C                     | -3.967551 | -1.172423 | -0.031316 |
| C                     | -4.007929 | -1.019887 | 1.303110  | S                     | -2.405665 | -1.385069 | -0.753356 |
| S                     | -2.492368 | -1.051078 | 2.138238  | C                     | -0.133119 | -1.435259 | 0.866069  |
| H                     | 2.343395  | -2.047995 | 1.439515  | H                     | 4.234911  | -2.447236 | -0.103817 |
| H                     | 3.879124  | -2.336784 | -2.572441 | H                     | 1.620589  | -1.787706 | -3.466797 |
| H                     | -0.245641 | -1.350547 | -1.965673 | H                     | -4.837237 | -1.171368 | -0.690121 |
| H                     | -4.917355 | -0.877215 | 1.888572  | H                     | 0.228900  | -1.414672 | 1.898687  |

### TS-3

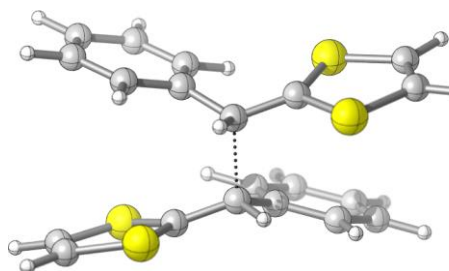

```
#p m062x/def2svp opt=(calcfc,ts,noeigen) nosymm
freq empiricaldispersi on=gd3
scrf=(smd,solvent=dichloromethane)
geom=connectivity
```

Charge = 1, Multiplicity = 2, Point group = C1

Electronic Energy = -2362.859125 Hartree

$S^2 = 0.7627$

Number of imaginary frequencies = 1,  $\nu_i = -150.50$

Sum of electronic and zero-point Energies = -2362.556496 Hartree

Sum of electronic and thermal Energies = -2362.535656 Hartree

Sum of electronic and thermal Enthalpies = -2362.534712 Hartree

Sum of electronic and thermal Free Energies = -2362.608439 Hartree

| Atoms | Cartesian Coordinates |           |           | Atom<br>s | Cartesian Coordinates |           |           |
|-------|-----------------------|-----------|-----------|-----------|-----------------------|-----------|-----------|
|       | X                     | Y         | Z         |           | X                     | Y         | Z         |
| C     | -0.521735             | 1.555164  | -1.629742 | C         | -1.472510             | 2.063518  | -2.516159 |
| C     | -2.686776             | 2.557943  | -2.043689 | C         | -2.943006             | 2.555151  | -0.672108 |
| C     | -1.993038             | 2.052764  | 0.213536  | C         | -0.771302             | 1.538156  | -0.250106 |
| C     | 1.559042              | 1.112005  | 0.739219  | C         | 4.026165              | 0.967645  | 1.470490  |
| C     | 4.058493              | 1.175519  | 0.143224  | S         | 2.454786              | 0.893518  | 2.197302  |
| S     | 2.531954              | 1.328416  | -0.663683 | C         | 0.132250              | 0.908539  | 0.765382  |
| H     | 0.400724              | 1.150961  | -2.045224 | H         | -1.258664             | 2.065023  | -3.586140 |
| H     | -3.428558             | 2.949615  | -2.741507 | H         | -3.885298             | 2.948703  | -0.287333 |
| H     | -2.199668             | 2.058486  | 1.286170  | H         | 4.901991              | 0.866083  | 2.113028  |
| H     | 4.966341              | 1.266499  | -0.454959 | H         | -0.250195             | 1.114890  | 1.774265  |
| C     | 1.992993              | -2.052677 | 0.214135  | C         | 2.942931              | -2.555326 | -0.671391 |
| C     | 2.686653              | -2.558525 | -2.042962 | C         | 1.472367              | -2.064250 | -2.515536 |
| C     | 0.521618              | -1.555636 | -1.629240 | C         | 0.771242              | -1.538204 | -0.249618 |
| C     | -1.559037             | -1.111766 | 0.739717  | C         | -4.058521             | -1.175589 | 0.143922  |
| C     | -4.026109             | -0.967342 | 1.471128  | S         | -2.532032             | -1.328627 | -0.663054 |
| S     | -2.454680             | -0.892930 | 2.197809  | C         | -0.132253             | -0.908252 | 0.765715  |
| H     | 2.199656              | -2.058077 | 1.286764  | H         | 3.885237              | -2.948762 | -0.286530 |
| H     | 3.428415              | -2.950395 | -2.740690 | H         | 1.258484              | -2.066076 | -3.585510 |
| H     | -0.400863             | -1.151572 | -2.044813 | H         | -4.966408             | -1.266792 | -0.454169 |
| H     | -4.901895             | -0.865646 | 2.113697  | H         | 0.250258              | -1.114244 | 1.774647  |

$\sigma$ -3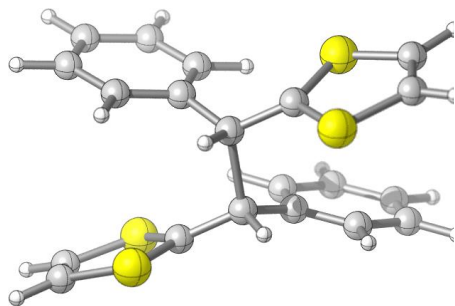

```
#p m062x/def2svp nosymm opt freq
empiricaldispersion=gd3 scrf=(smd,sol
vent=dichloromethane) geom=connectivity
```

Charge = 1, Multiplicity = 2, Point group = C1

Electronic Energy = -2362.859222 Hartree

$S^2 = 0.7604$

Number of imaginary frequencies = 0

Sum of electronic and zero-point Energies = -2362.554646 Hartree

Sum of electronic and thermal Energies = -2362.533935 Hartree

Sum of electronic and thermal Enthalpies = -2362.532990 Hartree

Sum of electronic and thermal Free Energies = -2362.605347 Hartree

| Cartesian Coordinates |           |           |           | Cartesian Coordinates |           |           |           |
|-----------------------|-----------|-----------|-----------|-----------------------|-----------|-----------|-----------|
| Atoms                 | X         | Y         | Z         | Atoms                 | X         | Y         | Z         |
| C                     | -0.419911 | 1.559835  | -1.665035 | C                     | -1.318190 | 2.117421  | -2.576832 |
| C                     | -2.529788 | 2.649822  | -2.140187 | C                     | -2.837594 | 2.633423  | -0.779497 |
| C                     | -1.939852 | 2.081616  | 0.130957  | C                     | -0.721110 | 1.531577  | -0.296650 |
| C                     | 1.565556  | 1.089585  | 0.783363  | C                     | 3.999029  | 0.954660  | 1.611628  |
| C                     | 4.082836  | 1.182596  | 0.289663  | S                     | 2.399827  | 0.854832  | 2.272576  |
| S                     | 2.588582  | 1.333574  | -0.575382 | C                     | 0.130335  | 0.864100  | 0.749393  |
| H                     | 0.502442  | 1.128338  | -2.053061 | H                     | -1.065181 | 2.128093  | -3.638158 |
| H                     | -3.230267 | 3.080380  | -2.857511 | H                     | -3.778937 | 3.054501  | -0.422655 |
| H                     | -2.185441 | 2.076146  | 1.195739  | H                     | 4.849090  | 0.852948  | 2.287873  |
| H                     | 5.013176  | 1.292242  | -0.269503 | H                     | -0.287518 | 1.113841  | 1.735554  |
| C                     | 1.939218  | -2.082661 | 0.128992  | C                     | 2.837289  | -2.632633 | -0.782255 |
| C                     | 2.530157  | -2.645906 | -2.143132 | C                     | 1.318825  | -2.112409 | -2.579186 |
| C                     | 0.420167  | -1.556743 | -1.666586 | C                     | 0.720808  | -1.531450 | -0.298018 |
| C                     | -1.565752 | -1.090985 | 0.782852  | C                     | -4.082963 | -1.184542 | 0.289114  |
| C                     | -3.999219 | -0.957439 | 1.611224  | S                     | -2.588669 | -1.334496 | -0.576074 |
| S                     | -2.400033 | -0.857465 | 2.272328  | C                     | -0.130618 | -0.865218 | 0.748827  |
| H                     | 2.184331  | -2.079432 | 1.193896  | H                     | 3.778404  | -3.054639 | -0.425905 |
| H                     | 3.230973  | -3.074881 | -2.861077 | H                     | 1.066371  | -2.120649 | -3.640667 |
| H                     | -0.501964 | -1.124220 | -2.054028 | H                     | -5.013274 | -1.294119 | -0.270117 |
| H                     | -4.849352 | -0.856474 | 2.287489  | H                     | 0.287480  | -1.115624 | 1.734722  |

$\pi$ -4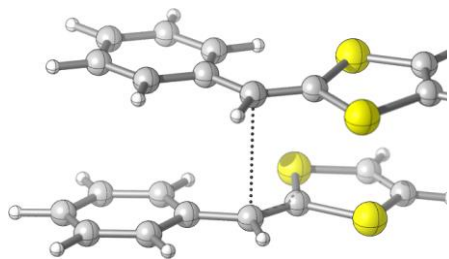

#p m062x/def2svp opt freq nosymm  
 scrf=(smd,solvent=dichloromethane)

Charge = 1, Multiplicity = 2, Point group = C1

Electronic Energy = -2362.869072 Hartree

$\hat{S}^2 = 0.7595$

Number of imaginary frequencies = 0

Sum of electronic and zero-point Energies = -2362.567874 Hartree

Sum of electronic and thermal Energies = -2362.545969 Hartree

Sum of electronic and thermal Enthalpies = -2362.545025 Hartree

Sum of electronic and thermal Free Energies = -2362.620655 Hartree

| Cartesian Coordinates |           |           |           | Cartesian Coordinates |           |           |           |
|-----------------------|-----------|-----------|-----------|-----------------------|-----------|-----------|-----------|
| Atoms                 | X         | Y         | Z         | Atoms                 | X         | Y         | Z         |
| C                     | 0.971041  | 1.579435  | 1.455637  | C                     | 2.115498  | 1.747573  | 2.231369  |
| C                     | 3.344547  | 2.025055  | 1.632603  | C                     | 3.430072  | 2.125259  | 0.240602  |
| C                     | 2.295446  | 1.951607  | -0.538417 | C                     | 1.036795  | 1.686381  | 0.048975  |
| C                     | -1.426174 | 1.432392  | -0.615637 | C                     | -3.831640 | 1.294628  | 0.340318  |
| C                     | -3.987428 | 1.250720  | -0.992972 | S                     | -2.206330 | 1.409626  | 0.943546  |
| S                     | -2.546237 | 1.298435  | -1.951515 | C                     | -0.078985 | 1.529409  | -0.862161 |
| C                     | 2.549462  | -1.128371 | -2.021118 | C                     | 3.933124  | -1.016410 | -1.968627 |
| C                     | 4.593912  | -1.109274 | -0.741813 | C                     | 3.856894  | -1.313288 | 0.427227  |
| C                     | 2.471689  | -1.425884 | 0.380642  | C                     | 1.786953  | -1.337829 | -0.849840 |
| C                     | -0.650725 | -1.657012 | -0.106776 | C                     | -3.001803 | -2.118946 | 0.894429  |
| C                     | -2.181283 | -2.025057 | 1.953856  | S                     | -2.289288 | -1.904461 | -0.669628 |
| S                     | -0.510199 | -1.680071 | 1.631768  | C                     | 0.352194  | -1.455569 | -1.023483 |
| H                     | 0.037054  | 1.363394  | 1.971400  | H                     | 2.042225  | 1.663499  | 3.316672  |
| H                     | 4.234966  | 2.161750  | 2.248471  | H                     | 4.388498  | 2.335733  | -0.236831 |
| H                     | 2.363118  | 2.029685  | -1.625430 | H                     | -4.645869 | 1.276502  | 1.066511  |
| H                     | -4.946689 | 1.185162  | -1.508486 | H                     | 0.195419  | 1.549232  | -1.921816 |
| H                     | 2.034091  | -1.058471 | -2.981541 | H                     | 4.499720  | -0.858543 | -2.887556 |
| H                     | 5.680817  | -1.024035 | -0.695630 | H                     | 4.367175  | -1.386957 | 1.388869  |
| H                     | 1.944194  | -1.596051 | 1.317731  | H                     | -4.071193 | -2.329950 | 0.948393  |
| H                     | -2.485256 | -2.140234 | 2.995428  | H                     | 0.020008  | -1.440052 | -2.066512 |



### TS-4

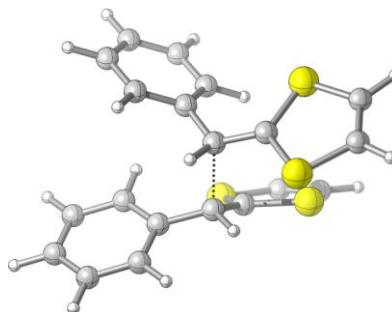

#p m062x/def2svp opt=(calcfc,ts,noeigen) freq nosymm  
scrf=(smd,solvent=dichloromethane)

Charge = 1, Multiplicity = 2, Point group = C1

Electronic Energy = -2362.854667 Hartree

$S^2 = 0.7642$

Number of imaginary frequencies = 1,  $\nu_i = -294.40$

Sum of electronic and zero-point Energies = -2362.551975 Hartree

Sum of electronic and thermal Energies = -2362.531176 Hartree

Sum of electronic and thermal Enthalpies = -2362.530231 Hartree

Sum of electronic and thermal Free Energies = -2362.603906 Hartree

| Cartesian Coordinates |           |           |           | Cartesian Coordinates |           |           |           |
|-----------------------|-----------|-----------|-----------|-----------------------|-----------|-----------|-----------|
| Atoms                 | X         | Y         | Z         | Atoms                 | X         | Y         | Z         |
| C                     | 0.124218  | -1.535456 | -1.533174 | C                     | 0.833425  | -2.239593 | -2.505864 |
| C                     | 1.879482  | -3.085508 | -2.137134 | C                     | 2.218731  | -3.223014 | -0.790007 |
| C                     | 1.516344  | -2.515712 | 0.182015  | C                     | 0.454854  | -1.671345 | -0.175511 |
| C                     | -1.644876 | -0.866832 | 0.986005  | C                     | -4.183049 | -0.899008 | 0.581236  |
| C                     | -4.032009 | -0.310415 | 1.779581  | S                     | -2.744865 | -1.446053 | -0.220137 |
| S                     | -2.409382 | -0.174042 | 2.378677  | C                     | -0.226012 | -0.898427 | 0.893546  |
| C                     | 2.348440  | 1.228292  | 2.298636  | C                     | 3.702970  | 1.156750  | 2.612675  |
| C                     | 4.622019  | 0.733096  | 1.651270  | C                     | 4.175579  | 0.373635  | 0.380144  |
| C                     | 2.819651  | 0.444828  | 0.062024  | C                     | 1.889892  | 0.889515  | 1.015616  |
| C                     | -0.101364 | 1.549293  | -0.424095 | C                     | -1.796698 | 2.456416  | -2.136959 |
| C                     | -0.627060 | 2.381299  | -2.795688 | S                     | -1.772886 | 1.979987  | -0.469874 |
| S                     | 0.743288  | 1.809715  | -1.903465 | C                     | 0.428034  | 0.975559  | 0.760673  |
| H                     | -0.675625 | -0.861754 | -1.849121 | H                     | 0.568306  | -2.120805 | -3.557626 |
| H                     | 2.431982  | -3.635819 | -2.900482 | H                     | 3.038912  | -3.879421 | -0.495140 |
| H                     | 1.791814  | -2.608840 | 1.234985  | H                     | -5.141554 | -1.071984 | 0.089530  |
| H                     | -4.846640 | 0.061223  | 2.402942  | H                     | 0.259380  | -1.007205 | 1.869492  |
| H                     | 1.630186  | 1.560475  | 3.052256  | H                     | 4.041907  | 1.433761  | 3.612213  |
| H                     | 5.684114  | 0.676460  | 1.895150  | H                     | 4.884413  | 0.023574  | -0.371885 |
| H                     | 2.497634  | 0.112929  | -0.926678 | H                     | -2.736728 | 2.808259  | -2.563969 |
| H                     | -0.477687 | 2.660835  | -3.839867 | H                     | -0.123432 | 1.304572  | 1.649629  |



$\sigma$ -4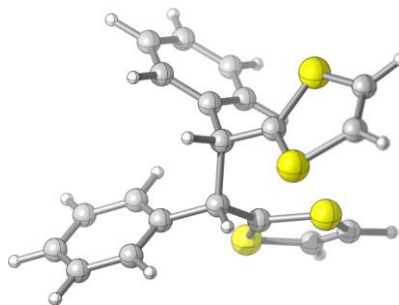

#p m062x/def2svp opt freq nosymm  
 scrf=(smd, solvent=dichloromethane)

Charge = 1, Multiplicity = 2, Point group = C1

Electronic Energy = -2362.859759 Hartree

$\hat{S}^2 = 0.7566$

Number of imaginary frequencies = 0

Sum of electronic and zero-point Energies = -2362.555441 Hartree

Sum of electronic and thermal Energies = -2362.534490 Hartree

Sum of electronic and thermal Enthalpies = -2362.533546 Hartree

Sum of electronic and thermal Free Energies = -2362.607679 Hartree

| Atoms | Cartesian Coordinates |           |           | Atom<br>s | Cartesian Coordinates |           |           |
|-------|-----------------------|-----------|-----------|-----------|-----------------------|-----------|-----------|
|       | X                     | Y         | Z         |           | X                     | Y         | Z         |
| C     | -0.168663             | -1.888510 | -1.008912 | C         | 0.300890              | -3.039400 | -1.641198 |
| C     | 1.066148              | -3.966537 | -0.932882 | C         | 1.352910              | -3.742359 | 0.413493  |
| C     | 0.886809              | -2.589518 | 1.043797  | C         | 0.127600              | -1.647787 | 0.340776  |
| C     | -1.770132             | -0.153272 | 1.055805  | C         | -4.318129             | -0.288020 | 0.839700  |
| C     | -4.090849             | 0.844081  | 1.525251  | S         | -2.942835             | -1.276792 | 0.446050  |
| S     | -2.435422             | 1.184567  | 1.946142  | C         | -0.300635             | -0.378635 | 1.044664  |
| C     | 2.509454              | 1.730911  | 1.776912  | C         | 3.865702              | 1.693014  | 2.097155  |
| C     | 4.708083              | 0.782409  | 1.459964  | C         | 4.186575              | -0.089923 | 0.505009  |
| C     | 2.829077              | -0.056294 | 0.186161  | C         | 1.976203              | 0.861255  | 0.817995  |
| C     | 0.150985              | 1.266665  | -0.881879 | C         | -1.188024             | 1.787796  | -2.991187 |
| C     | 0.081309              | 1.596439  | -3.406919 | S         | -1.457093             | 1.648150  | -1.289304 |
| S     | 1.241246              | 1.243098  | -2.184566 | C         | 0.491852              | 0.937022  | 0.522121  |
| H     | -0.777748             | -1.185063 | -1.581473 | H         | 0.064838              | -3.212012 | -2.692426 |
| H     | 1.433713              | -4.865848 | -1.429836 | H         | 1.946043              | -4.465161 | 0.975975  |
| H     | 1.126126              | -2.406438 | 2.093823  | H         | -5.306207             | -0.639964 | 0.539004  |
| H     | -4.863149             | 1.537693  | 1.860093  | H         | 0.059078              | -0.435509 | 2.084496  |
| H     | 1.853324              | 2.447786  | 2.276030  | H         | 4.264055              | 2.379805  | 2.845665  |
| H     | 5.770468              | 0.751871  | 1.707320  | H         | 4.837604              | -0.808461 | 0.004621  |
| H     | 2.444245              | -0.759958 | -0.554502 | H         | -2.034232             | 2.030557  | -3.635944 |
| H     | 0.422320              | 1.663812  | -4.441586 | H         | 0.079030              | 1.749000  | 1.144372  |

$\pi$ -5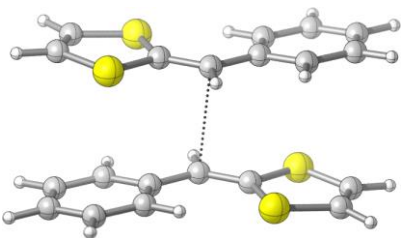

#p m062x/def2svp opt freq nosymm  
scrf=(smd,solvent=dichloromethane)

Charge = 1, Multiplicity = 2, Point group = C1

Electronic Energy = -2362.865229 Hartree

$\hat{S}^2 = 0.7601$

Number of imaginary frequencies = 0

Sum of electronic and zero-point Energies = -2362.564341 Hartree

Sum of electronic and thermal Energies = -2362.542268 Hartree

Sum of electronic and thermal Enthalpies = -2362.541324 Hartree

Sum of electronic and thermal Free Energies = -2362.618650 Hartree

| Cartesian Coordinates |           |           |           | Cartesian Coordinates |           |           |           |
|-----------------------|-----------|-----------|-----------|-----------------------|-----------|-----------|-----------|
| Atoms                 | X         | Y         | Z         | Atoms                 | X         | Y         | Z         |
| C                     | 1.758393  | -2.339988 | -0.446109 | C                     | 3.078401  | -2.682944 | -0.723443 |
| C                     | 4.121823  | -2.191465 | 0.063811  | C                     | 3.837632  | -1.341109 | 1.134536  |
| C                     | 2.521655  | -0.994893 | 1.416693  | C                     | 1.451446  | -1.495474 | 0.642177  |
| C                     | -1.122691 | -1.490472 | 0.620955  | C                     | -3.222755 | -2.552820 | -0.457893 |
| C                     | -3.697954 | -1.747541 | 0.506914  | S                     | -1.498352 | -2.608775 | -0.661491 |
| S                     | -2.533982 | -0.863181 | 1.430700  | C                     | 0.121555  | -1.070434 | 1.030642  |
| C                     | -2.498372 | 0.961821  | -1.432837 | C                     | -3.822186 | 1.292633  | -1.170069 |
| C                     | -4.130503 | 2.157206  | -0.117354 | C                     | -3.102929 | 2.679426  | 0.670756  |
| C                     | -1.775031 | 2.351155  | 0.413503  | C                     | -1.444114 | 1.490744  | -0.655100 |
| C                     | 1.129594  | 1.509372  | -0.595852 | C                     | 3.701058  | 1.783410  | -0.438664 |
| C                     | 3.204740  | 2.585240  | 0.517972  | S                     | 2.558362  | 0.892979  | -1.384110 |
| S                     | 1.476192  | 2.632925  | 0.690796  | C                     | -0.104645 | 1.076491  | -1.021237 |
| H                     | 0.979598  | -2.734069 | -1.098145 | H                     | 3.294011  | -3.339170 | -1.567987 |
| H                     | 5.153297  | -2.468392 | -0.159639 | H                     | 4.645816  | -0.946664 | 1.752751  |
| H                     | 2.300987  | -0.333627 | 2.258097  | H                     | -3.834448 | -3.170222 | -1.117071 |
| H                     | -4.754426 | -1.614160 | 0.744861  | H                     | 0.106716  | -0.348647 | 1.854393  |
| H                     | -2.258667 | 0.290959  | -2.261394 | H                     | -4.617853 | 0.875596  | -1.789711 |
| H                     | -5.168368 | 2.422276  | 0.090408  | H                     | -3.336821 | 3.348516  | 1.500192  |
| H                     | -1.009068 | 2.770843  | 1.064673  | H                     | 4.762292  | 1.656636  | -0.658094 |
| H                     | 3.801431  | 3.206012  | 1.187688  | H                     | -0.071953 | 0.349038  | -1.839236 |

### TS-5

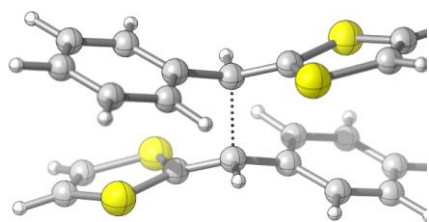

```
#p m062x/def2svp opt=(calcfc,ts,noeigen) freq
nosymm scrf=(smd,solvent=dichloromethane)
```

Charge = 1, Multiplicity = 2, Point group = C1

Electronic Energy = -2362.854707 Hartree

$\hat{S}^2 = 0.7665$

Number of imaginary frequencies = 1,  $\nu_i = -275.22$

Sum of electronic and zero-point Energies = -2362.551468 Hartree

Sum of electronic and thermal Energies = -2362.530697 Hartree

Sum of electronic and thermal Enthalpies = -2362.529753 Hartree

Sum of electronic and thermal Free Energies = -2362.603464 Hartree

| Atoms | Cartesian Coordinates |           |           | Atom<br>s | Cartesian Coordinates |           |           |
|-------|-----------------------|-----------|-----------|-----------|-----------------------|-----------|-----------|
|       | X                     | Y         | Z         |           | X                     | Y         | Z         |
| C     | 1.526651              | -2.260894 | -0.630269 | C         | 2.773864              | -2.872826 | -0.751264 |
| C     | 3.744316              | -2.695567 | 0.234188  | C         | 3.461939              | -1.899509 | 1.344911  |
| C     | 2.213814              | -1.293802 | 1.471332  | C         | 1.225675              | -1.475605 | 0.492583  |
| C     | -1.317433             | -1.361853 | 0.464559  | C         | -3.345836             | -2.711526 | -0.374844 |
| C     | -3.847354             | -1.851296 | 0.527397  | S         | -1.634997             | -2.641780 | -0.652491 |
| S     | -2.719369             | -0.785408 | 1.292224  | C         | -0.053437             | -0.731811 | 0.656252  |
| C     | -2.213943             | 1.293518  | -1.471321 | C         | -3.462167             | 1.898973  | -1.344687 |
| C     | -3.744497             | 2.695021  | -0.233943 | C         | -2.773884             | 2.872533  | 0.751301  |
| C     | -1.526569             | 2.260841  | 0.630104  | C         | -1.225654             | 1.475546  | -0.492760 |
| C     | 1.317513              | 1.362016  | -0.464844 | C         | 3.847456              | 1.851427  | -0.527483 |
| C     | 3.345794              | 2.712028  | 0.374323  | S         | 2.719592              | 0.785211  | -1.292030 |
| S     | 1.634911              | 2.642398  | 0.651730  | C         | 0.053549              | 0.731945  | -0.656600 |
| H     | 0.814107              | -2.369390 | -1.450156 | H         | 2.991735              | -3.478723 | -1.632179 |
| H     | 4.720979              | -3.171559 | 0.133426  | H         | 4.216513              | -1.748856 | 2.118748  |
| H     | 1.995980              | -0.668985 | 2.340723  | H         | -3.925690             | -3.449144 | -0.931459 |
| H     | -4.898704             | -1.783243 | 0.811145  | H         | -0.047810             | -0.106350 | 1.557175  |
| H     | -1.996147             | 0.668749  | -2.340756 | H         | -4.216854             | 1.748142  | -2.118380 |
| H     | -4.721235             | 3.170823  | -0.133018 | H         | -2.991692             | 3.478454  | 1.632214  |
| H     | -0.813872             | 2.369649  | 1.449820  | H         | 4.898856              | 1.783227  | -0.811012 |
| H     | 3.925564              | 3.449857  | 0.930742  | H         | 0.047934              | 0.106588  | -1.557600 |

$\sigma$ -5

#p m062x/def2svp opt freq nosymm  
 scrf=(smd, solvent=dichloromethane)

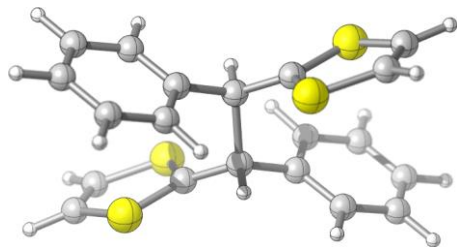

Charge = 1, Multiplicity = 2, Point group = C1

Electronic Energy = -2362.857236 Hartree

$S^2 = 0.7578$

Number of imaginary frequencies = 0

Sum of electronic and zero-point Energies = -2362.553557 Hartree

Sum of electronic and thermal Energies = -2362.532214 Hartree

Sum of electronic and thermal Enthalpies = -2362.531270 Hartree

Sum of electronic and thermal Free Energies = -2362.607360 Hartree

| Cartesian Coordinates |           |           |           | Cartesian Coordinates |           |           |           |
|-----------------------|-----------|-----------|-----------|-----------------------|-----------|-----------|-----------|
| Atoms                 | X         | Y         | Z         | Atoms                 | X         | Y         | Z         |
| C                     | 1.606497  | -2.139161 | -0.737659 | C                     | 2.811071  | -2.836226 | -0.822567 |
| C                     | 3.689401  | -2.855096 | 0.261178  | C                     | 3.357069  | -2.172884 | 1.431090  |
| C                     | 2.148380  | -1.482312 | 1.518895  | C                     | 1.258786  | -1.463673 | 0.439759  |
| C                     | -1.266328 | -1.388131 | 0.409420  | C                     | -3.258525 | -2.720298 | -0.520665 |
| C                     | -3.744193 | -2.059373 | 0.544209  | S                     | -1.578498 | -2.482865 | -0.885022 |
| S                     | -2.630107 | -1.049545 | 1.402917  | C                     | -0.006616 | -0.642489 | 0.558026  |
| C                     | -2.125224 | 1.457911  | -1.494783 | C                     | -3.338472 | 2.139737  | -1.397226 |
| C                     | -3.678265 | 2.797395  | -0.215636 | C                     | -2.804458 | 2.761641  | 0.871511  |
| C                     | -1.597074 | 2.071129  | 0.777965  | C                     | -1.241211 | 1.422481  | -0.412099 |
| C                     | 1.279536  | 1.376152  | -0.406824 | C                     | 3.736581  | 2.107736  | -0.561656 |
| C                     | 3.186316  | 2.912266  | 0.365483  | S                     | 2.689278  | 0.934635  | -1.279468 |
| S                     | 1.504960  | 2.669824  | 0.699716  | C                     | 0.029657  | 0.610911  | -0.534794 |
| H                     | 0.962773  | -2.100830 | -1.620397 | H                     | 3.068935  | -3.356378 | -1.746505 |
| H                     | 4.634159  | -3.396599 | 0.191221  | H                     | 4.040731  | -2.176551 | 2.281725  |
| H                     | 1.892306  | -0.944368 | 2.434727  | H                     | -3.832730 | -3.397592 | -1.154156 |
| H                     | -4.773155 | -2.120272 | 0.901647  | H                     | -0.012940 | -0.154121 | 1.543442  |
| H                     | -1.861878 | 0.940801  | -2.420518 | H                     | -4.019110 | 2.156482  | -2.250090 |
| H                     | -4.626254 | 3.332275  | -0.138756 | H                     | -3.068959 | 3.261875  | 1.804500  |
| H                     | -0.954501 | 2.015884  | 1.660919  | H                     | 4.777445  | 2.144084  | -0.886361 |
| H                     | 3.710846  | 3.703049  | 0.903713  | H                     | 0.033563  | 0.110869  | -1.515362 |

$\pi$ -6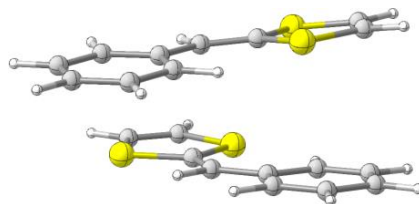

```
#p m062x/def2svp opt nosymm freq
empiricaldispersion=gd3 scrf=(smd,sol
vent=dichloromethane) geom=connectivity
```

Charge = 1, Multiplicity = 2, Point group = C1

Electronic Energy = -2362.870313 Hartree

 $\hat{S}^2 = 0.7596$ 

Number of imaginary frequencies = 0

Sum of electronic and zero-point Energies = -2362.568569 Hartree

Sum of electronic and thermal Energies = -2362.546676 Hartree

Sum of electronic and thermal Enthalpies = -2362.545732 Hartree

Sum of electronic and thermal Free Energies = -2362.621945 Hartree

| Atoms | Cartesian Coordinates |           |           | Atom<br>s | Cartesian Coordinates |           |           |
|-------|-----------------------|-----------|-----------|-----------|-----------------------|-----------|-----------|
|       | X                     | Y         | Z         |           | X                     | Y         | Z         |
| C     | 1.975985              | -1.105790 | 1.350119  | C         | 3.315281              | -0.779493 | 1.536885  |
| C     | 3.679716              | 0.452945  | 2.086534  | C         | 2.688781              | 1.363863  | 2.456128  |
| C     | 1.348434              | 1.047441  | 2.265987  | C         | 0.959718              | -0.192499 | 1.706521  |
| C     | -1.154940             | -1.440606 | 0.962708  | C         | -2.018472             | -3.574075 | -0.233482 |
| C     | -3.121618             | -2.863787 | 0.045012  | S         | -0.492587             | -2.907313 | 0.278054  |
| S     | -2.905860             | -1.358035 | 0.880919  | C         | -0.461243             | -0.396091 | 1.516495  |
| C     | -2.805266             | 1.598614  | -1.008643 | C         | -3.624609             | 2.608344  | -0.514644 |
| C     | -3.065052             | 3.688711  | 0.167432  | C         | -1.680256             | 3.751853  | 0.351461  |
| C     | -0.855050             | 2.749466  | -0.144089 | C         | -1.404458             | 1.649960  | -0.839111 |
| C     | 0.711246              | 0.353702  | -1.498535 | C         | 2.985657              | -0.718577 | -2.103983 |
| C     | 3.285809              | 0.499670  | -1.612536 | S         | 1.316405              | -1.149400 | -2.147415 |
| S     | 1.967193              | 1.488605  | -1.094079 | C         | -0.644480             | 0.529335  | -1.358517 |
| H     | 1.743441              | -2.086179 | 0.937409  | H         | 4.084956              | -1.500152 | 1.255412  |
| H     | 4.733164              | 0.696286  | 2.234003  | H         | 2.961545              | 2.325406  | 2.893674  |
| H     | 0.572031              | 1.759751  | 2.554826  | H         | -2.007051             | -4.539598 | -0.740839 |
| H     | -4.138254             | -3.171843 | -0.204376 | H         | -1.083564             | 0.431587  | 1.871185  |
| H     | -3.243143             | 0.755530  | -1.546665 | H         | -4.703921             | 2.551493  | -0.662919 |
| H     | -3.704310             | 4.482076  | 0.557929  | H         | -1.238740             | 4.591083  | 0.890950  |
| H     | 0.214349              | 2.826307  | 0.048643  | H         | 3.716733              | -1.442836 | -2.466103 |
| H     | 4.295192              | 0.904669  | -1.523109 | H         | -1.255595             | -0.299661 | -1.732851 |

$\pi$ -7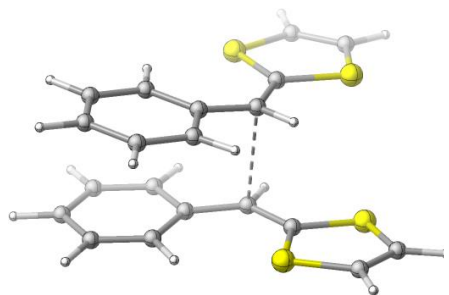

#p m062x/def2svp opt freq empiricaldispersion=gd3  
nosymm geom=connectivity  
scrf=(smd, solvent=dichloromethane)

Charge = 2, Multiplicity = 1, Point group = C1

Electronic Energy = -2362.655555 Hartree

Number of imaginary frequencies = 0

Sum of electronic and zero-point Energies = -2362.351565 Hartree

Sum of electronic and thermal Energies = -2362.330405 Hartree

Sum of electronic and thermal Enthalpies = -2362.329461 Hartree

Sum of electronic and thermal Free Energies = -2362.401778 Hartree

| Cartesian Coordinates |           |           |           | Cartesian Coordinates |           |           |           |
|-----------------------|-----------|-----------|-----------|-----------------------|-----------|-----------|-----------|
| Atoms                 | X         | Y         | Z         | Atoms                 | X         | Y         | Z         |
| C                     | 2.106962  | 0.210437  | -1.279628 | C                     | 3.463308  | 0.044123  | -1.501293 |
| C                     | 4.044533  | 0.477867  | -2.700414 | C                     | 3.264786  | 1.092846  | -3.682917 |
| C                     | 1.905272  | 1.266512  | -3.471321 | C                     | 1.292630  | 0.824115  | -2.265934 |
| C                     | -1.004068 | 0.754028  | -1.106191 | C                     | -3.184235 | 0.639688  | 0.243524  |
| C                     | -2.269997 | -0.027293 | 0.977921  | S                     | -2.622135 | 1.330384  | -1.230362 |
| S                     | -0.666691 | -0.103491 | 0.345328  | C                     | -0.117808 | 1.015008  | -2.169518 |
| H                     | 1.705481  | -0.121875 | -0.324355 | H                     | 4.081212  | -0.421476 | -0.732681 |
| H                     | 5.116329  | 0.347656  | -2.859931 | H                     | 3.722565  | 1.446441  | -4.607108 |
| H                     | 1.296400  | 1.778161  | -4.218926 | H                     | -4.229253 | 0.787668  | 0.523199  |
| H                     | -2.464655 | -0.500724 | 1.942817  | H                     | -0.560759 | 1.599666  | -2.983046 |
| C                     | 0.621409  | -2.755285 | -1.576290 | C                     | 1.838824  | -3.357205 | -1.293905 |
| C                     | 2.879787  | -3.282561 | -2.222026 | C                     | 2.699521  | -2.609829 | -3.438261 |
| C                     | 1.490814  | -2.001335 | -3.729416 | C                     | 0.420299  | -2.057177 | -2.799828 |
| C                     | -1.402226 | -0.781167 | -4.095777 | C                     | -1.956303 | 0.445843  | -6.274757 |
| C                     | -3.114363 | 0.422102  | -5.582635 | S                     | -0.596567 | -0.322555 | -5.544685 |
| S                     | -3.075800 | -0.381162 | -4.061264 | C                     | -0.851876 | -1.435624 | -2.974550 |
| H                     | -0.209365 | -2.850471 | -0.873782 | H                     | 1.975076  | -3.897406 | -0.356707 |
| H                     | 3.835253  | -3.764356 | -2.007167 | H                     | 3.512929  | -2.567185 | -4.163497 |
| H                     | 1.393879  | -1.500301 | -4.690529 | H                     | -1.825030 | 0.895038  | -7.261398 |
| H                     | -4.059334 | 0.847931  | -5.924852 | H                     | -1.579304 | -1.636814 | -2.179639 |

## TS-6

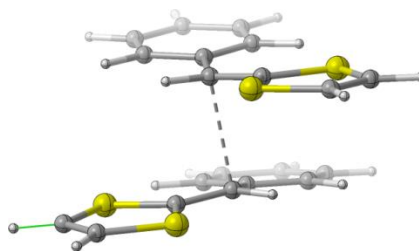

```
#p m062x/def2svp opt=(calcfc,ts,noeigen) freq
empiricaldispersion=gd3 nosymm geom=connectivity
scrf=(smd,solvent=dichloromethane)
```

Charge = 2, Multiplicity = 1, Point group = C1

Electronic Energy = -2362.655517 Hartree

Number of imaginary frequencies = 1,  $\nu_i = -48.47$

Sum of electronic and zero-point Energies = -2362.351697 Hartree

Sum of electronic and thermal Energies = -2362.331202 Hartree

Sum of electronic and thermal Enthalpies = -2362.330258 Hartree

Sum of electronic and thermal Free Energies = -2362.401276 Hartree

| Cartesian Coordinates |           |           |           | Cartesian Coordinates |           |           |           |
|-----------------------|-----------|-----------|-----------|-----------------------|-----------|-----------|-----------|
| Atoms                 | X         | Y         | Z         | Atoms                 | X         | Y         | Z         |
| C                     | 2.095509  | 0.179870  | -1.260866 | C                     | 3.458996  | 0.039940  | -1.463206 |
| C                     | 4.052192  | 0.508239  | -2.642211 | C                     | 3.277021  | 1.127906  | -3.625057 |
| C                     | 1.910179  | 1.270774  | -3.434354 | C                     | 1.288461  | 0.798411  | -2.247750 |
| C                     | -1.017275 | 0.747803  | -1.092155 | C                     | -3.186798 | 0.725573  | 0.276955  |
| C                     | -2.280715 | 0.063527  | 1.025623  | S                     | -2.621539 | 1.351611  | -1.223822 |
| S                     | -0.687078 | -0.070633 | 0.378689  | C                     | -0.131743 | 0.955828  | -2.174214 |
| H                     | 1.683104  | -0.187892 | -0.323069 | H                     | 4.070837  | -0.433803 | -0.694670 |
| H                     | 5.128428  | 0.399517  | -2.786695 | H                     | 3.742984  | 1.507275  | -4.534873 |
| H                     | 1.304339  | 1.780972  | -4.186133 | H                     | -4.225504 | 0.907861  | 0.559627  |
| H                     | -2.475600 | -0.373309 | 2.007376  | H                     | -0.569236 | 1.539885  | -2.990266 |
| C                     | 0.643516  | -2.761888 | -1.611589 | C                     | 1.850644  | -3.396445 | -1.355259 |
| C                     | 2.885539  | -3.320122 | -2.289655 | C                     | 2.708705  | -2.612729 | -3.485415 |
| C                     | 1.507323  | -1.976683 | -3.752248 | C                     | 0.444901  | -2.036351 | -2.816487 |
| C                     | -1.397146 | -0.772768 | -4.102995 | C                     | -1.989792 | 0.374583  | -6.313319 |
| C                     | -3.142865 | 0.347112  | -5.613210 | S                     | -0.610302 | -0.339248 | -5.565470 |
| S                     | -3.075925 | -0.406959 | -4.067977 | C                     | -0.820261 | -1.383973 | -2.964875 |
| H                     | -0.180334 | -2.849953 | -0.899780 | H                     | 1.983723  | -3.960553 | -0.431762 |
| H                     | 3.833437  | -3.824552 | -2.094442 | H                     | 3.517698  | -2.563026 | -4.215187 |
| H                     | 1.416079  | -1.444026 | -4.696866 | H                     | -1.873469 | 0.792880  | -7.315223 |
| H                     | -4.099463 | 0.740375  | -5.961909 | H                     | -1.541069 | -1.594811 | -2.167060 |

$\sigma$ -6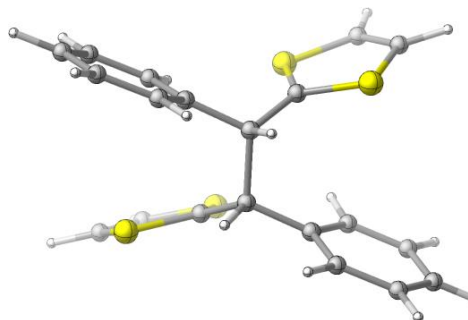

```
#p m062x/def2svp opt freq
empiricaldispersion=gd3 nosymm
geom=connectivity
scrf=(smd,solvent=dichloromethane)
```

Charge = 2, Multiplicity = 1, Point group = C1

Electronic Energy = -2362.691479 Hartree

Number of imaginary frequencies = 0

Sum of electronic and zero-point Energies = -2362.384318 Hartree

Sum of electronic and thermal Energies = -2362.364060 Hartree

Sum of electronic and thermal Enthalpies = -2362.363116 Hartree

Sum of electronic and thermal Free Energies = -2362.434838 Hartree

| Atoms | Cartesian Coordinates |           |           | Atoms | Cartesian Coordinates |           |           |
|-------|-----------------------|-----------|-----------|-------|-----------------------|-----------|-----------|
|       | X                     | Y         | Z         |       | X                     | Y         | Z         |
| C     | 1.498157              | 1.894078  | -3.192055 | C     | 1.713293              | 3.098152  | -3.860222 |
| C     | 0.648533              | 3.966514  | -4.100896 | C     | -0.632767             | 3.625404  | -3.671381 |
| C     | -0.847621             | 2.424702  | -2.995939 | C     | 0.215479              | 1.550012  | -2.744344 |
| C     | 0.761915              | -0.166474 | -0.916446 | C     | 2.626323              | -0.833409 | 0.685134  |
| C     | 1.473638              | -1.068704 | 1.355525  | S     | 2.448225              | -0.197346 | -0.897274 |
| S     | 0.035949              | -0.700776 | 0.504223  | C     | -0.112779             | 0.224509  | -2.078895 |
| H     | 2.357170              | 1.231365  | -3.058098 | H     | 2.718857              | 3.352898  | -4.197437 |
| H     | 0.818968              | 4.908554  | -4.624120 | H     | -1.471572             | 4.297856  | -3.856290 |
| H     | -1.852691             | 2.165628  | -2.654543 | H     | 3.634082              | -0.994832 | 1.073718  |
| H     | 1.402212              | -1.454432 | 2.374820  | H     | -1.122989             | 0.320899  | -1.655993 |
| C     | -2.024247             | -2.586760 | -2.316889 | C     | -2.426090             | -3.732193 | -1.631010 |
| C     | -1.473451             | -4.577784 | -1.065100 | C     | -0.118284             | -4.268943 | -1.180191 |
| C     | 0.284111              | -3.119536 | -1.858822 | C     | -0.666592             | -2.272356 | -2.443809 |
| C     | 0.752723              | -1.011275 | -4.180876 | C     | 2.871591              | -1.277343 | -5.566639 |
| C     | 2.048859              | -0.501540 | -6.311560 | S     | 2.241538              | -1.792965 | -4.057466 |
| S     | 0.524899              | -0.158898 | -5.614544 | C     | -0.321220             | -0.960999 | -3.127529 |
| H     | -2.772933             | -1.928421 | -2.763886 | H     | -3.488436             | -3.964854 | -1.545163 |
| H     | -1.785495             | -5.477406 | -0.532653 | H     | 0.634730              | -4.921105 | -0.735781 |
| H     | 1.354670              | -2.902905 | -1.892995 | H     | 3.872383              | -1.605524 | -5.854984 |
| H     | 2.281690              | -0.098199 | -7.299424 | H     | -1.225321             | -0.635370 | -3.661965 |



$\sigma$ -7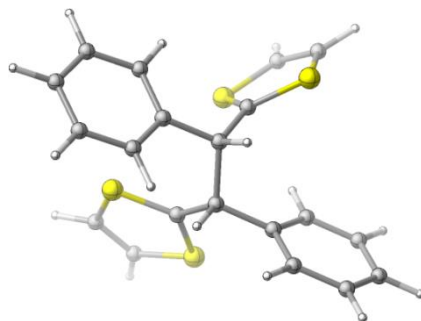

#p m062x/def2svp opt freq empiricaldispersion=gd3  
 nosymm geom=connectivity  
 scrf=(smd,solvent=dichloromethane)

Charge = 2, Multiplicity = 1, Point group = C1

Electronic Energy = -2362.694716 Hartree

Number of imaginary frequencies = 0

Sum of electronic and zero-point Energies = -2362.387660 Hartree

Sum of electronic and thermal Energies = -2362.367401 Hartree

Sum of electronic and thermal Enthalpies = -2362.366456 Hartree

Sum of electronic and thermal Free Energies = -2362.438176 Hartree

| Atoms | Cartesian Coordinates |           |           | Atoms | Cartesian Coordinates |           |           |
|-------|-----------------------|-----------|-----------|-------|-----------------------|-----------|-----------|
|       | X                     | Y         | Z         |       | X                     | Y         | Z         |
| C     | 1.232195              | 2.452871  | -2.176760 | C     | 1.354705              | 3.716603  | -2.758859 |
| C     | 0.384019              | 4.183086  | -3.640281 | C     | -0.731974             | 3.390696  | -3.916752 |
| C     | -0.857574             | 2.132085  | -3.337133 | C     | 0.138745              | 1.636407  | -2.482161 |
| C     | 1.061043              | -0.237387 | -1.016474 | C     | 2.317898              | -1.129639 | 1.003042  |
| C     | 3.235198              | -1.071994 | 0.008696  | S     | 0.737319              | -0.618494 | 0.583685  |
| S     | 2.661481              | -0.482702 | -1.497754 | C     | -0.039283             | 0.217877  | -1.936543 |
| H     | 2.003052              | 2.137878  | -1.473808 | H     | 2.218595              | 4.335579  | -2.513041 |
| H     | 0.486989              | 5.166789  | -4.100443 | H     | -1.512222             | 3.754402  | -4.586814 |
| H     | -1.745519             | 1.536399  | -3.559049 | H     | 2.510146              | -1.468065 | 2.023618  |
| H     | 4.287085              | -1.353431 | 0.095599  | H     | -0.966442             | 0.206458  | -1.341992 |
| C     | -2.143195             | -2.485281 | -2.564191 | C     | -2.636971             | -3.667601 | -2.015785 |
| C     | -1.771313             | -4.561055 | -1.386390 | C     | -0.410157             | -4.268325 | -1.308309 |
| C     | 0.084390              | -3.084410 | -1.853357 | C     | -0.779378             | -2.179720 | -2.488732 |
| C     | 0.781140              | -0.970548 | -4.098184 | C     | 2.488117              | -0.536548 | -5.936297 |
| C     | 2.379037              | -1.882707 | -5.857505 | S     | 1.499595              | 0.361423  | -4.860073 |
| S     | 1.277692              | -2.472319 | -4.684572 | C     | -0.314860             | -0.848542 | -3.061091 |
| H     | -2.824053             | -1.788222 | -3.058256 | H     | -3.702607             | -3.890584 | -2.084184 |
| H     | -2.156220             | -5.487864 | -0.958587 | H     | 0.275392              | -4.963424 | -0.821994 |
| H     | 1.157994              | -2.894377 | -1.779564 | H     | 3.141858              | 0.009496  | -6.620358 |
| H     | 2.927495              | -2.601481 | -6.470052 | H     | -1.171912             | -0.443103 | -3.621102 |

$\sigma$ -8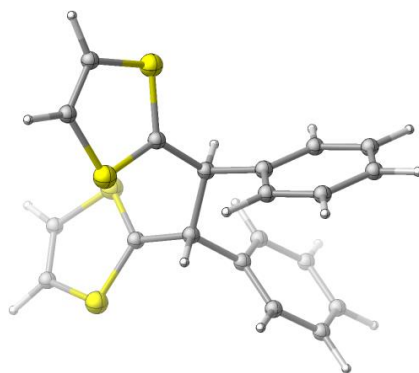

```
#p m062x/def2svp opt freq empiricaldispersion=gd3
nosymm geom=connectivity
scrf=(smd,solvent=dichloromethane)
```

Charge = 2, Multiplicity = 1, Point group = C1

Electronic Energy = -2362.694867 Hartree

Number of imaginary frequencies = 0

Sum of electronic and zero-point Energies = -2362.388739 Hartree

Sum of electronic and thermal Energies = -2362.368139 Hartree

Sum of electronic and thermal Enthalpies = -2362.367195 Hartree

Sum of electronic and thermal Free Energies = -2362.440837 Hartree

| Atoms | Cartesian Coordinates |           |           | Atom<br>s | Cartesian Coordinates |           |           |
|-------|-----------------------|-----------|-----------|-----------|-----------------------|-----------|-----------|
|       | X                     | Y         | Z         |           | X                     | Y         | Z         |
| C     | 1.444775              | -0.165576 | -0.244872 | C         | 2.652249              | -0.188582 | 0.450382  |
| C     | 3.807434              | 0.330080  | -0.136006 | C         | 3.753178              | 0.873319  | -1.419212 |
| C     | 2.546529              | 0.898621  | -2.117440 | C         | 1.390541              | 0.375818  | -1.533164 |
| C     | -1.006319             | 1.031168  | -1.567263 | C         | -2.463359             | 2.779011  | -0.436406 |
| C     | -2.946922             | 1.586754  | -0.018107 | S         | -1.130324             | 2.708901  | -1.514719 |
| S     | -2.140727             | 0.203446  | -0.636843 | C         | 0.096061              | 0.355241  | -2.346099 |
| H     | 0.551432              | -0.578428 | 0.231691  | H         | 2.688136              | -0.612389 | 1.454925  |
| H     | 4.751545              | 0.311722  | 0.410462  | H         | 4.653568              | 1.278362  | -1.883151 |
| H     | 2.503764              | 1.314493  | -3.126338 | H         | -2.855350             | 3.756722  | -0.147070 |
| H     | -3.785988             | 1.443017  | 0.666397  | H         | 0.277214              | 0.964391  | -3.248034 |
| C     | 1.625103              | -2.780390 | -2.983138 | C         | 2.726692              | -3.316394 | -3.649840 |
| C     | 3.120204              | -2.795554 | -4.881853 | C         | 2.409716              | -1.737212 | -5.450595 |
| C     | 1.308543              | -1.199521 | -4.787614 | C         | 0.917913              | -1.717260 | -3.548716 |
| C     | -1.509957             | -1.221771 | -3.592533 | C         | -3.574664             | -2.156019 | -4.743134 |
| C     | -3.425645             | -0.905479 | -5.237393 | S         | -2.406435             | -2.646567 | -3.585689 |
| S     | -2.086907             | -0.022644 | -4.624542 | C         | -0.245845             | -1.098821 | -2.775325 |
| H     | 1.322250              | -3.179905 | -2.012793 | H         | 3.280244              | -4.141710 | -3.199889 |
| H     | 3.982862              | -3.214939 | -5.401773 | H         | 2.713148              | -1.327201 | -6.414794 |
| H     | 0.767796              | -0.365991 | -5.245335 | H         | -4.369289             | -2.853674 | -5.016581 |
| H     | -4.076578             | -0.428703 | -5.973957 | H         | -0.389085             | -1.706114 | -1.865436 |

$\sigma$ -9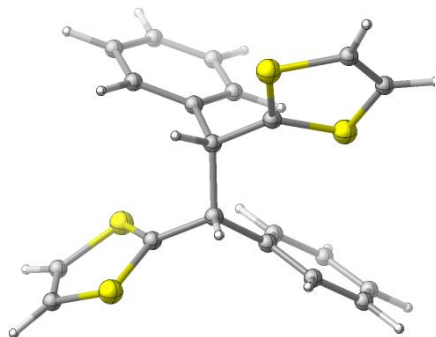

```
#p m062x/def2svp opt freq empiricaldispersion=gd3
nosymm geom=connectivity
scrf=(smd, solvent=dichloromethane)
```

Charge = 2, Multiplicity = 1, Point group = C1

Electronic Energy = -2362.695517 Hartree

Number of imaginary frequencies = 0

Sum of electronic and zero-point Energies = -2362.387904 Hartree

Sum of electronic and thermal Energies = -2362.367691 Hartree

Sum of electronic and thermal Enthalpies = -2362.366747 Hartree

Sum of electronic and thermal Free Energies = -2362.438458 Hartree

| Atoms | Cartesian Coordinates |           |           | Atom<br>s | Cartesian Coordinates |           |           |
|-------|-----------------------|-----------|-----------|-----------|-----------------------|-----------|-----------|
|       | X                     | Y         | Z         |           | X                     | Y         | Z         |
| C     | 2.123558              | 0.650575  | -2.002011 | C         | 3.305995              | 1.298446  | -2.357882 |
| C     | 3.271057              | 2.425737  | -3.178496 | C         | 2.047354              | 2.912090  | -3.637617 |
| C     | 0.865273              | 2.262972  | -3.287587 | C         | 0.893217              | 1.116146  | -2.481249 |
| C     | -0.615131             | 0.222989  | -0.692919 | C         | -1.275387             | 0.623794  | 1.732004  |
| C     | -0.484778             | -0.474913 | 1.746089  | S         | -1.541299             | 1.318161  | 0.189348  |
| S     | 0.106061              | -0.995910 | 0.222033  | C         | -0.438993             | 0.437024  | -2.176275 |
| H     | 2.186553              | -0.221966 | -1.349166 | H         | 4.258233              | 0.921672  | -1.982588 |
| H     | 4.198353              | 2.932682  | -3.449752 | H         | 2.010128              | 3.801367  | -4.268294 |
| H     | -0.092019             | 2.643203  | -3.652878 | H         | -1.744011             | 1.081130  | 2.605772  |
| H     | -0.213986             | -1.050438 | 2.634132  | H         | -1.220151             | 1.156238  | -2.462916 |
| C     | -0.790601             | -3.157335 | -1.997465 | C         | -0.165078             | -4.335190 | -1.593312 |
| C     | 1.197999              | -4.515111 | -1.825523 | C         | 1.927613              | -3.521457 | -2.478653 |
| C     | 1.302412              | -2.344677 | -2.889289 | C         | -0.059606             | -2.143952 | -2.632191 |
| C     | -0.758341             | -0.598758 | -4.480080 | C         | -0.131273             | -0.151224 | -6.900904 |
| C     | -1.458076             | -0.421737 | -6.919914 | S         | 0.618993              | -0.189370 | -5.359996 |
| S     | -2.158883             | -0.769354 | -5.397477 | C         | -0.799094             | -0.860642 | -2.994398 |
| H     | -1.857272             | -3.017475 | -1.806151 | H         | -0.746476             | -5.113327 | -1.096891 |
| H     | 1.691634              | -5.434975 | -1.508415 | H         | 2.990732              | -3.662072 | -2.678358 |
| H     | 1.902993              | -1.594128 | -3.405972 | H         | 0.479809              | 0.093512  | -7.772548 |
| H     | -2.092345             | -0.433828 | -7.808660 | H         | -1.857666             | -1.039675 | -2.755349 |

$\sigma$ -10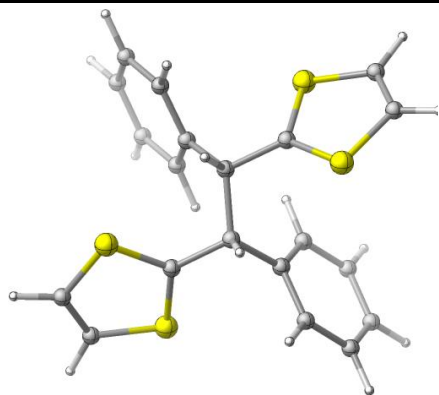

#p m062x/def2svp opt freq empiricaldispersion=gd3  
 nosymm geom=connectivity  
 scrf=(smd, solvent=dichloromethane)

Charge = 2, Multiplicity = 1, Point group = C1

Electronic Energy = -2362.693939 Hartree

Number of imaginary frequencies = 0

Sum of electronic and zero-point Energies = -2362.387182 Hartree

Sum of electronic and thermal Energies = -2362.366883 Hartree

Sum of electronic and thermal Enthalpies = -2362.365939 Hartree

Sum of electronic and thermal Free Energies = -2362.437480 Hartree

| Cartesian Coordinates |           |           |           | Cartesian Coordinates |           |           |           |
|-----------------------|-----------|-----------|-----------|-----------------------|-----------|-----------|-----------|
| Atoms                 | X         | Y         | Z         | Atoms                 | X         | Y         | Z         |
| C                     | 1.840125  | 0.741705  | -3.289857 | C                     | 2.875796  | 1.596506  | -3.668467 |
| C                     | 2.759620  | 2.971844  | -3.475010 | C                     | 1.595790  | 3.496050  | -2.912359 |
| C                     | 0.556644  | 2.645189  | -2.544073 | C                     | 0.673084  | 1.258949  | -2.716282 |
| C                     | -0.502000 | 0.222536  | -0.753092 | C                     | 0.035458  | 0.366088  | 1.723017  |
| C                     | -1.062976 | -0.419517 | 1.642199  | S                     | 0.643991  | 0.962570  | 0.234592  |
| S                     | -1.660906 | -0.692815 | 0.057736  | C                     | -0.502587 | 0.401397  | -2.256473 |
| H                     | 1.961992  | -0.328081 | -3.462308 | H                     | 3.777248  | 1.178387  | -4.118159 |
| H                     | 3.572981  | 3.636234  | -3.770241 | H                     | 1.490056  | 4.572121  | -2.768139 |
| H                     | -0.359064 | 3.061033  | -2.114738 | H                     | 0.547317  | 0.644695  | 2.646582  |
| H                     | -1.582293 | -0.880018 | 2.485030  | H                     | -1.410500 | 1.003437  | -2.444793 |
| C                     | -0.761386 | -3.431102 | -2.564719 | C                     | -0.205369 | -4.614748 | -2.084729 |
| C                     | 1.028391  | -4.591910 | -1.434420 | C                     | 1.700595  | -3.382303 | -1.266280 |
| C                     | 1.150928  | -2.197480 | -1.756078 | C                     | -0.083812 | -2.213242 | -2.415423 |
| C                     | -0.526780 | -0.835901 | -4.475529 | C                     | 0.109556  | -1.258703 | -6.895431 |
| C                     | -0.525315 | -0.064069 | -6.897834 | S                     | 0.253670  | -2.030703 | -5.370002 |
| S                     | -1.074294 | 0.484580  | -5.367899 | C                     | -0.753055 | -0.966394 | -2.984880 |
| H                     | -1.736756 | -3.450531 | -3.059101 | H                     | -0.743781 | -5.555036 | -2.210535 |
| H                     | 1.462661  | -5.516341 | -1.051111 | H                     | 2.660835  | -3.354108 | -0.749729 |
| H                     | 1.698655  | -1.266520 | -1.604451 | H                     | 0.522669  | -1.756134 | -7.775316 |
| H                     | -0.708092 | 0.560112  | -7.775141 | H                     | -1.841591 | -1.147553 | -2.908359 |

$\pi$ -8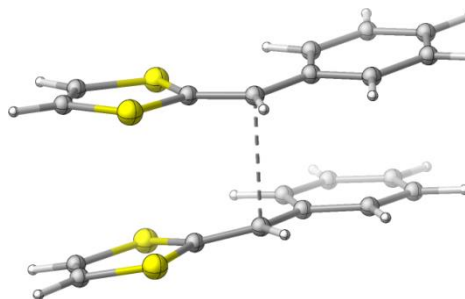

```
#p m062x/def2svp opt freq
empiricaldispersion=gd3 nosymm
geom=connectivity
scrf=(smd,solvent=dichloromethane)
```

Charge = 2, Multiplicity = 1, Point group = C1

Electronic Energy = -2362.658833 Hartree

Number of imaginary frequencies = 0

Sum of electronic and zero-point Energies = -2362.355409 Hartree

Sum of electronic and thermal Energies = -2362.334252 Hartree

Sum of electronic and thermal Enthalpies = -2362.333308 Hartree

Sum of electronic and thermal Free Energies = -2362.405335 Hartree

| Atoms | Cartesian Coordinates |           |           | Atoms | Cartesian Coordinates |           |           |
|-------|-----------------------|-----------|-----------|-------|-----------------------|-----------|-----------|
|       | X                     | Y         | Z         |       | X                     | Y         | Z         |
| C     | -1.200927             | -1.911165 | 1.007873  | C     | -2.417979             | -2.257047 | 1.572936  |
| C     | -3.582661             | -2.268768 | 0.795734  | C     | -3.530469             | -1.926618 | -0.558039 |
| C     | -2.319228             | -1.578325 | -1.133314 | C     | -1.121532             | -1.579379 | -0.371489 |
| C     | 1.405706              | -1.294623 | -0.687474 | C     | 3.970770              | -1.149777 | -0.752168 |
| C     | 3.664908              | -1.570179 | 0.497097  | S     | 2.647803              | -0.856442 | -1.801750 |
| S     | 1.997823              | -1.786853 | 0.857815  | C     | 0.067100              | -1.215004 | -1.079655 |
| C     | -2.696889             | 1.562701  | -1.529407 | C     | -4.062416             | 1.484650  | -1.312231 |
| C     | -4.544225             | 1.280852  | -0.015871 | C     | -3.657301             | 1.164587  | 1.062932  |
| C     | -2.291158             | 1.259175  | 0.858375  | C     | -1.779475             | 1.465017  | -0.447594 |
| C     | 0.743520              | 1.644595  | 0.022227  | C     | 3.200089              | 1.987550  | 0.708865  |
| C     | 2.557535              | 1.623845  | 1.839229  | S     | 2.238426              | 2.111237  | -0.713145 |
| S     | 0.869103              | 1.300271  | 1.710200  | C     | -0.399023             | 1.599088  | -0.783821 |
| H     | -0.327048             | -1.909346 | 1.657252  | H     | -2.464725             | -2.517938 | 2.630601  |
| H     | -4.534395             | -2.548448 | 1.250688  | H     | -4.438996             | -1.931330 | -1.161462 |
| H     | -2.267725             | -1.320096 | -2.192767 | H     | 4.982840              | -0.991198 | -1.130794 |
| H     | 4.396952              | -1.808750 | 1.271293  | H     | -0.085182             | -0.951973 | -2.131174 |
| H     | -2.307042             | 1.712762  | -2.538595 | H     | -4.756019             | 1.575156  | -2.148575 |
| H     | -5.619368             | 1.215737  | 0.160688  | H     | -4.042945             | 1.009589  | 2.071151  |
| H     | -1.637585             | 1.192014  | 1.727199  | H     | 4.262894              | 2.229919  | 0.643405  |
| H     | 3.027424              | 1.516270  | 2.819107  | H     | -0.207453             | 1.820232  | -1.839627 |

## TS-7

```
#p m062x/def2svp opt=(calcfc,ts,noeigen) freq
empiricaldispersion=gd3 nosymm geom=connectivity
scrf=(smd,solvent=dichloromethane)
```

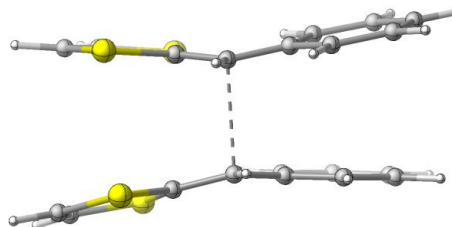

Charge = 2, Multiplicity = 1, Point group = C1

Electronic Energy = -2362.658198 Hartree

Number of imaginary frequencies = 1,  $\nu_i = -81.53$

Sum of electronic and zero-point Energies = -2362.355069 Hartree

Sum of electronic and thermal Energies = -2362.334452 Hartree

Sum of electronic and thermal Enthalpies = -2362.333508 Hartree

Sum of electronic and thermal Free Energies = -2362.404855 Hartree

| Atoms | Cartesian Coordinates |           |           | Atoms | Cartesian Coordinates |           |           |
|-------|-----------------------|-----------|-----------|-------|-----------------------|-----------|-----------|
|       | X                     | Y         | Z         |       | X                     | Y         | Z         |
| C     | -0.996966             | -1.669995 | 1.320993  | C     | -2.150262             | -2.022999 | 2.008766  |
| C     | -3.329586             | -2.307440 | 1.313933  | C     | -3.357932             | -2.236337 | -0.081357 |
| C     | -2.212385             | -1.882331 | -0.777503 | C     | -1.003626             | -1.601638 | -0.094743 |
| C     | 1.483979              | -1.229452 | -0.612240 | C     | 4.037076              | -1.079351 | -0.857406 |
| C     | 3.817079              | -1.313016 | 0.454514  | S     | 2.640808              | -0.953837 | -1.849673 |
| S     | 2.172922              | -1.486016 | 0.938167  | C     | 0.106304              | -1.207397 | -0.920229 |
| C     | -2.588506             | 1.096244  | -1.886289 | C     | -3.969329             | 1.032101  | -1.777484 |
| C     | -4.565786             | 1.058256  | -0.514176 | C     | -3.777053             | 1.159174  | 0.637144  |
| C     | -2.396159             | 1.241510  | 0.536314  | C     | -1.773018             | 1.212719  | -0.732673 |
| C     | 0.684287              | 1.609859  | -0.071337 | C     | 3.011513              | 2.285304  | 0.786973  |
| C     | 2.280377              | 2.032998  | 1.893024  | S     | 2.196379              | 2.113302  | -0.719404 |
| S     | 0.649092              | 1.536003  | 1.642927  | C     | -0.356667             | 1.275909  | -0.965595 |
| H     | -0.108031             | -1.450082 | 1.910623  | H     | -2.130117             | -2.075341 | 3.097782  |
| H     | -4.228820             | -2.589021 | 1.864351  | H     | -4.277389             | -2.459012 | -0.624359 |
| H     | -2.225339             | -1.838259 | -1.868110 | H     | 5.019106              | -0.966333 | -1.321983 |
| H     | 4.593623              | -1.426866 | 1.214421  | H     | -0.112411             | -1.158786 | -1.991955 |
| H     | -2.114600             | 1.074234  | -2.869882 | H     | -4.583852             | 0.958209  | -2.675183 |
| H     | -5.651872             | 1.003730  | -0.423501 | H     | -4.246630             | 1.181567  | 1.621072  |
| H     | -1.825913             | 1.338179  | 1.458852  | H     | 4.050621              | 2.620649  | 0.781101  |
| H     | 2.639905              | 2.117337  | 2.920851  | H     | -0.070807             | 1.339442  | -2.021577 |

**σ-11**

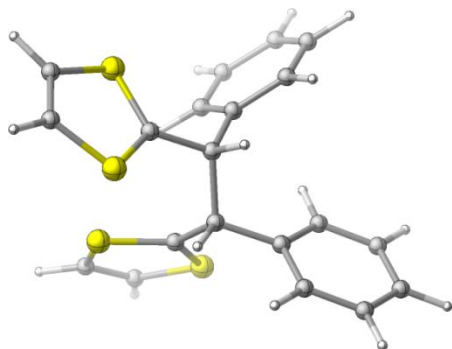

#p m062x/def2svp opt freq  
empiricaldispersion=gd3 nosymm geom=connectivity  
scrf=(smd, solvent=dichloromethane)

Charge = 2, Multiplicity = 1, Point group = C1

Electronic Energy = -2362.693397 Hartree

Number of imaginary frequencies = 0

Sum of electronic and zero-point Energies = -2362.386530 Hartree

Sum of electronic and thermal Energies = -2362.366240 Hartree

Sum of electronic and thermal Enthalpies = -2362.365296 Hartree

Sum of electronic and thermal Free Energies = -2362.437368 Hartree

| Cartesian Coordinates |           |           |           | Cartesian Coordinates |           |           |           |
|-----------------------|-----------|-----------|-----------|-----------------------|-----------|-----------|-----------|
| Atoms                 | X         | Y         | Z         | Atoms                 | X         | Y         | Z         |
| C                     | -0.301038 | -0.792208 | 2.216245  | C                     | -0.627377 | -1.115430 | 3.533181  |
| C                     | -1.804368 | -1.806061 | 3.819252  | C                     | -2.658271 | -2.178859 | 2.781981  |
| C                     | -2.333741 | -1.862685 | 1.464175  | C                     | -1.155592 | -1.167314 | 1.168460  |
| C                     | 0.364599  | -1.605036 | -0.801267 | C                     | 2.144352  | -2.665827 | -2.290904 |
| C                     | 2.530548  | -2.916155 | -1.018709 | S                     | 0.674325  | -1.795773 | -2.451960 |
| S                     | 1.497785  | -2.322818 | 0.214817  | C                     | -0.854364 | -0.864893 | -0.292860 |
| C                     | 0.008642  | 2.344728  | 1.110654  | C                     | 1.023258  | 3.024823  | 1.781590  |
| C                     | 2.357101  | 2.806566  | 1.437692  | C                     | 2.674193  | 1.915625  | 0.412263  |
| C                     | 1.660803  | 1.234783  | -0.260888 | C                     | 0.318259  | 1.437601  | 0.091819  |
| C                     | -0.923893 | 1.011426  | -2.053685 | C                     | -1.704390 | 1.191311  | -4.472178 |
| C                     | -0.673177 | 2.059936  | -4.354207 | S                     | -2.113008 | 0.334510  | -3.044050 |
| S                     | 0.060472  | 2.150923  | -2.806687 | C                     | -0.813860 | 0.684688  | -0.580119 |
| H                     | 0.625470  | -0.246593 | 2.028993  | H                     | 0.045989  | -0.820193 | 4.338954  |
| H                     | -2.054713 | -2.055103 | 4.851576  | H                     | -3.580269 | -2.721193 | 2.996392  |
| H                     | -3.001154 | -2.160446 | 0.652540  | H                     | 2.673476  | -2.979676 | -3.193610 |
| H                     | 3.428550  | -3.466063 | -0.727417 | H                     | -1.705550 | -1.269859 | -0.864209 |
| H                     | -1.034888 | 2.506532  | 1.390418  | H                     | 0.769151  | 3.724974  | 2.578458  |
| H                     | 3.152079  | 3.336120  | 1.964773  | H                     | 3.714726  | 1.749181  | 0.130681  |
| H                     | 1.941417  | 0.556122  | -1.070906 | H                     | -2.282526 | 1.004864  | -5.380321 |
| H                     | -0.283721 | 2.689315  | -5.157840 | H                     | -1.759093 | 1.048165  | -0.144436 |

$\sigma$ -12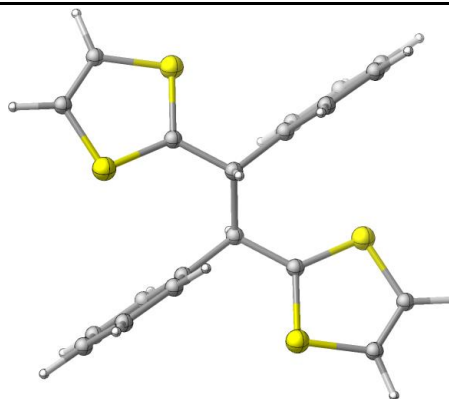

#p m062x/def2svp opt freq  
 empiricaldispersion=gd3 nosymm geom=connectivity  
 scrf=(smd, solvent=dichloromethane)

Charge = 2, Multiplicity = 1, Point group = C1

Electronic Energy = -2362.702522 Hartree

Number of imaginary frequencies = 0

Sum of electronic and zero-point Energies = -2362.395221 Hartree

Sum of electronic and thermal Energies = -2362.375122 Hartree

Sum of electronic and thermal Enthalpies = -2362.374178 Hartree

Sum of electronic and thermal Free Energies = -2362.445139 Hartree

| Cartesian Coordinates |           |           |           | Cartesian Coordinates |           |           |           |
|-----------------------|-----------|-----------|-----------|-----------------------|-----------|-----------|-----------|
| Atoms                 | X         | Y         | Z         | Atoms                 | X         | Y         | Z         |
| C                     | 1.635214  | -1.911917 | -1.048438 | C                     | 2.816057  | -2.631330 | -1.216041 |
| C                     | 3.609677  | -2.940194 | -0.109555 | C                     | 3.214368  | -2.541541 | 1.167272  |
| C                     | 2.031396  | -1.823140 | 1.339150  | C                     | 1.241943  | -1.496275 | 0.232297  |
| C                     | -1.255470 | -1.494275 | 0.181525  | C                     | -2.790103 | -3.506146 | -0.123715 |
| C                     | -3.613754 | -2.443513 | 0.028511  | S                     | -1.115223 | -3.159550 | -0.062130 |
| S                     | -2.846498 | -0.926999 | 0.255725  | C                     | -0.009047 | -0.656876 | 0.426268  |
| C                     | -2.031346 | 1.823101  | -1.339273 | C                     | -3.214339 | 2.541474  | -1.167423 |
| C                     | -3.609686 | 2.940121  | 0.109394  | C                     | -2.816082 | 2.631280  | 1.215898  |
| C                     | -1.635218 | 1.911895  | 1.048323  | C                     | -1.241909 | 1.496257  | -0.232402 |
| C                     | 1.255500  | 1.494313  | -0.181557 | C                     | 3.613752  | 2.443608  | -0.028425 |
| C                     | 2.790069  | 3.506221  | 0.123762  | S                     | 2.846544  | 0.927074  | -0.255672 |
| S                     | 1.115200  | 3.159583  | 0.062101  | C                     | 0.009104  | 0.656886  | -0.426345 |
| H                     | 1.023916  | -1.672728 | -1.923322 | H                     | 3.120140  | -2.946535 | -2.215143 |
| H                     | 4.538427  | -3.496664 | -0.244329 | H                     | 3.830378  | -2.785758 | 2.033770  |
| H                     | 1.726060  | -1.495963 | 2.336006  | H                     | -3.105520 | -4.539819 | -0.280692 |
| H                     | -4.705554 | -2.475935 | 0.010776  | H                     | -0.055410 | -0.368646 | 1.489592  |
| H                     | -1.725980 | 1.495929  | -2.336122 | H                     | -3.830334 | 2.785674  | -2.033937 |
| H                     | -4.538452 | 3.496567  | 0.244146  | H                     | -3.120194 | 2.946481  | 2.214992  |
| H                     | -1.023932 | 1.672728  | 1.923223  | H                     | 4.705550  | 2.476056  | -0.010636 |
| H                     | 3.105454  | 4.539901  | 0.280755  | H                     | 0.055504  | 0.368664  | -1.489669 |



### 3. Results of Intrinsic Reaction Coordinate (IRC) Analysis

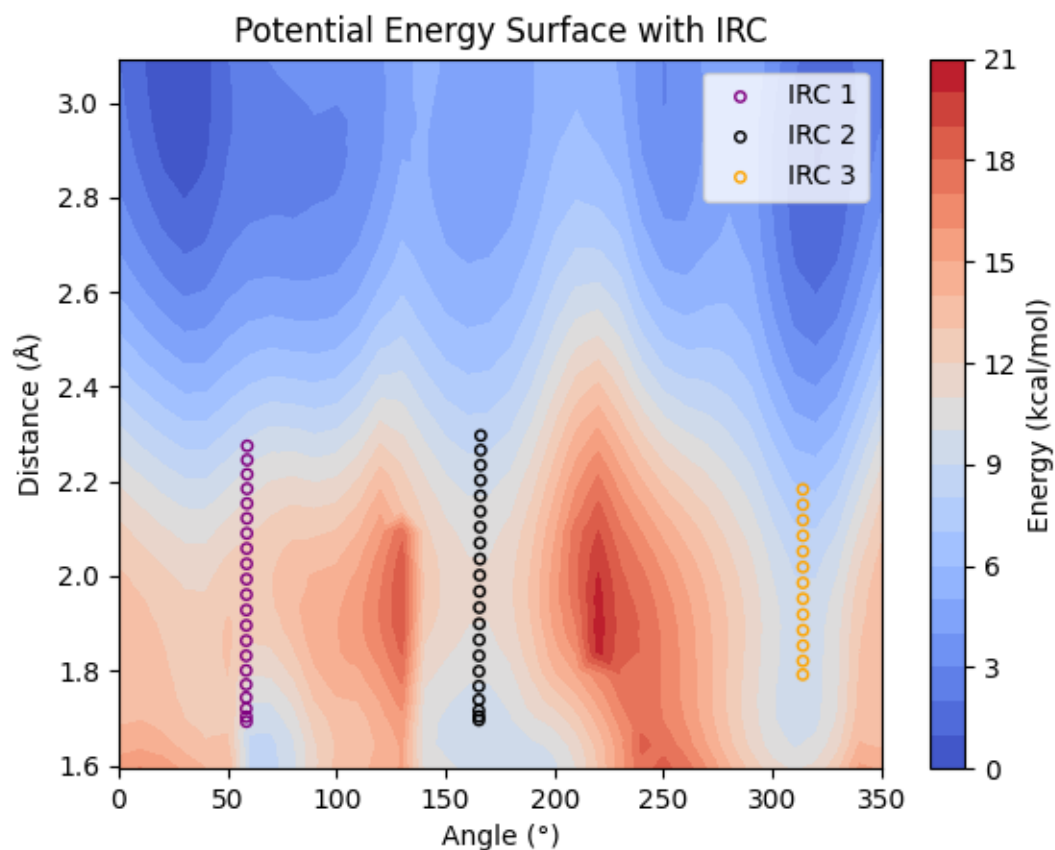

**Figure S-1:** 2D-contour plot of the PES of anti-MV-dimer (in vacuo) and the IRC trajectories calculated from **TS-1** (IRC 1), **TS-2** (IRC 2) and **TS-3** (IRC 3).

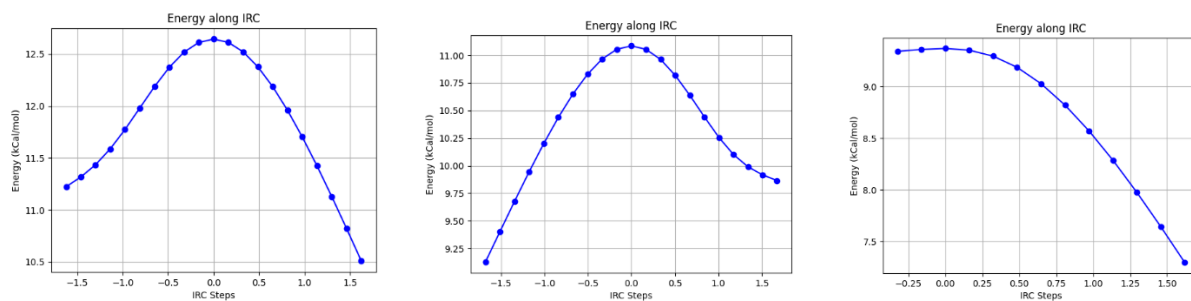

**Figure S-2:** IRC trajectories (in vacuo) calculated from **TS-1** (left), **TS-2** (middle) and **TS-3** (right).

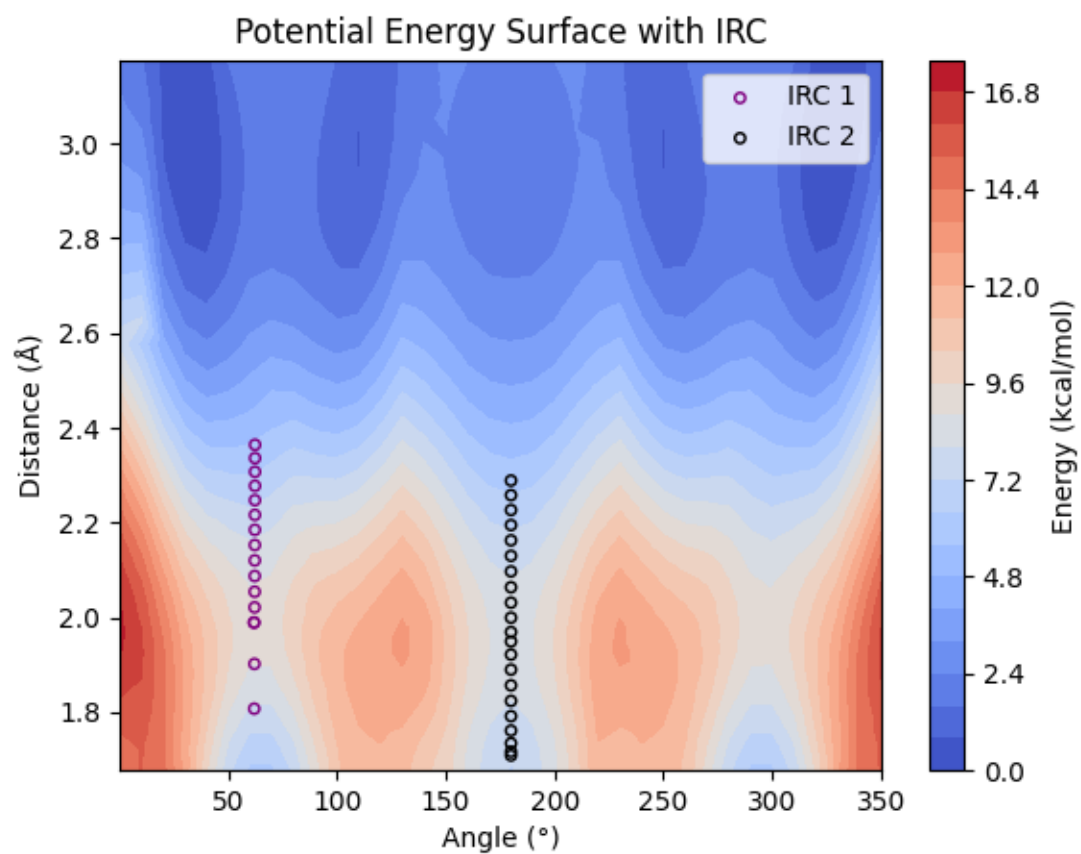

**Figure S-3:** 2D-contour plot of the PES of syn-MV-dimer (in vacuo) and the IRC trajectories calculated from **TS-4** (IRC 1) and **TS-5** (IRC 2).

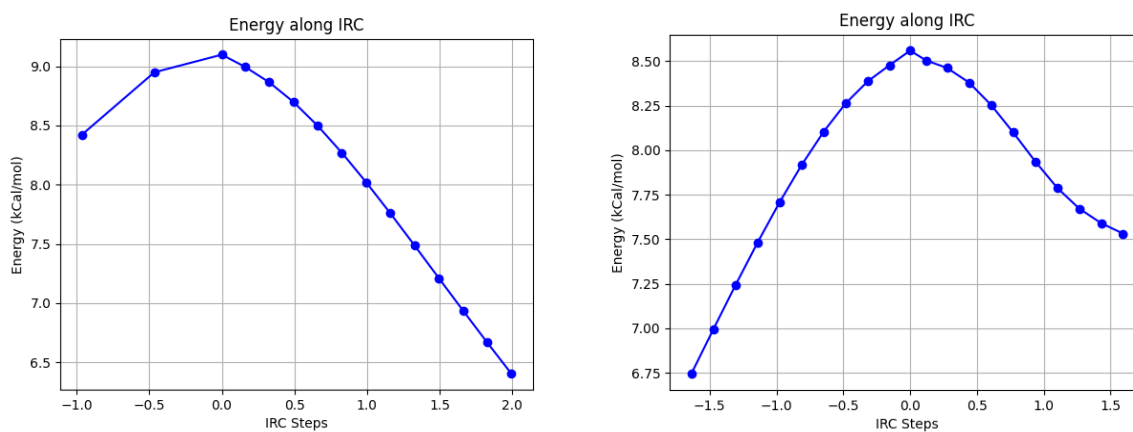

**Figure S-4:** IRC trajectories (in vacuo) calculated from **TS-4** (left) and **TS-5** (right).

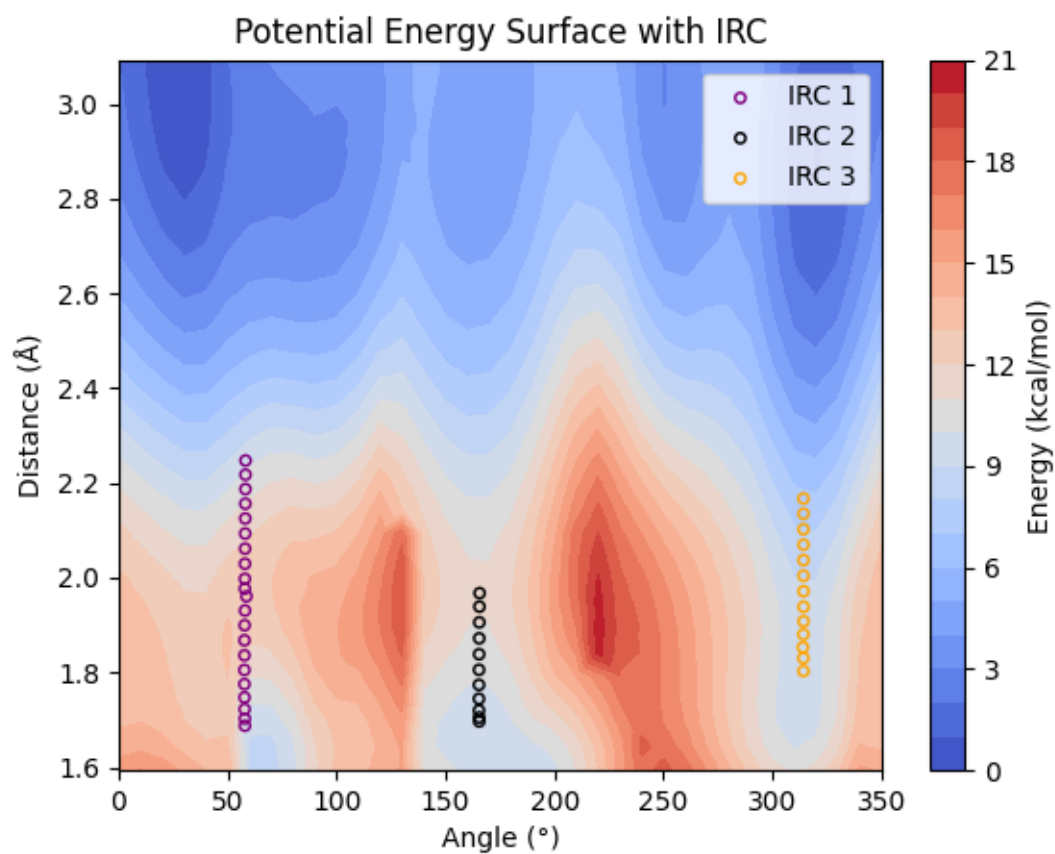

**Figure S-5:** 2D-contour plot of the PES of anti-MV-dimer (in  $\text{CH}_2\text{Cl}_2$ ) and the IRC trajectories calculated from **TS-1** (IRC 1), **TS-2** (IRC 2), and **TS-3** (IRC 3).

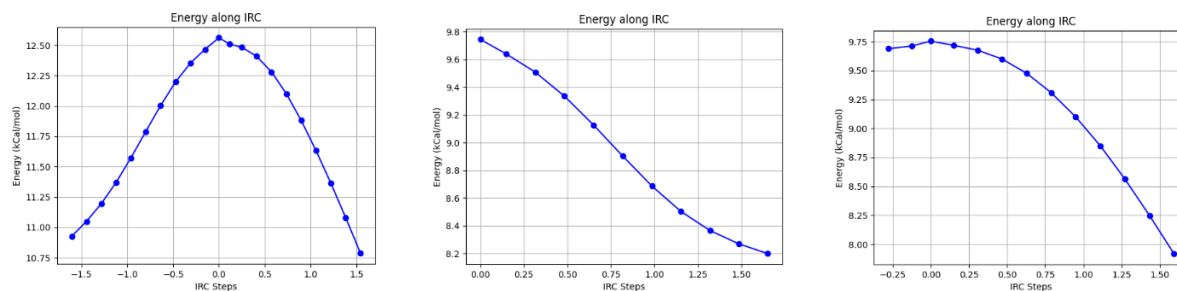

**Figure S-6:** IRC trajectories (in  $\text{CH}_2\text{Cl}_2$ ) calculated from **TS-1** (left), **TS-2** (middle), and **TS-3** (right).

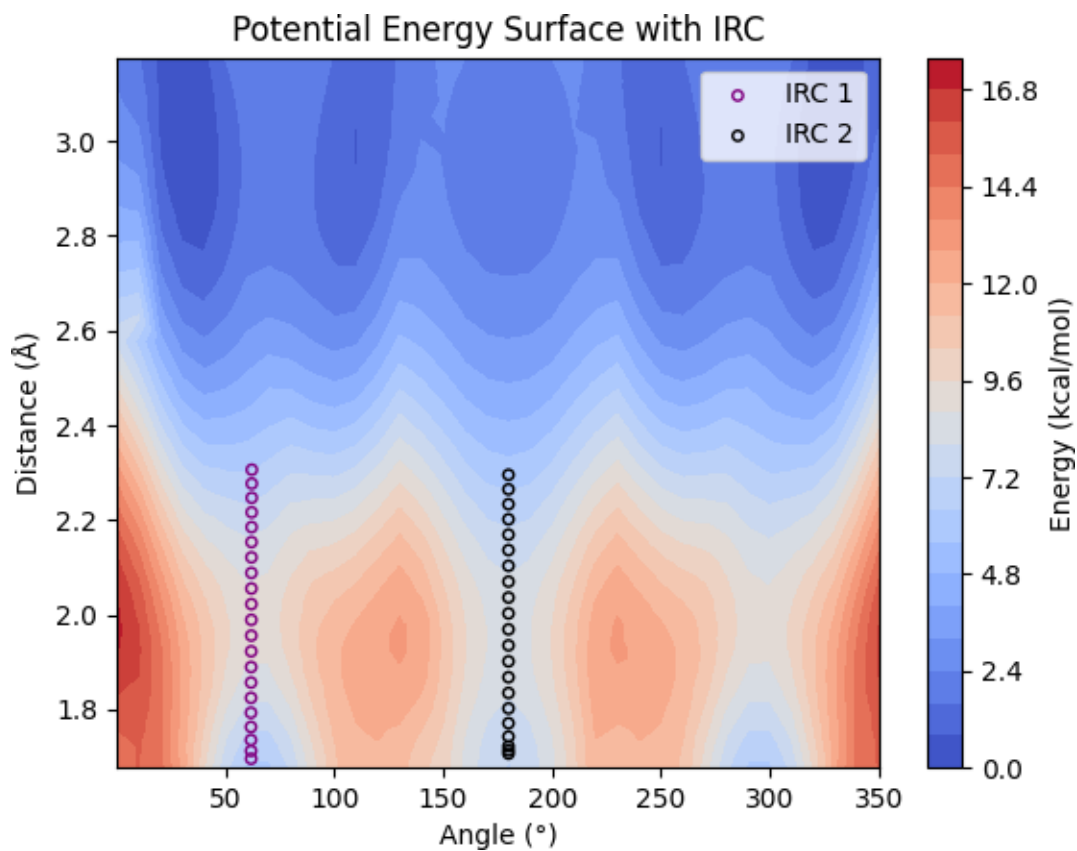

**Figure S-7:** 2D-contour plot of the PES of syn-MV-dimer (in  $\text{CH}_2\text{Cl}_2$ ) and the IRC trajectories calculated from TS-4 (IRC 1) and TS-5 (IRC 2).

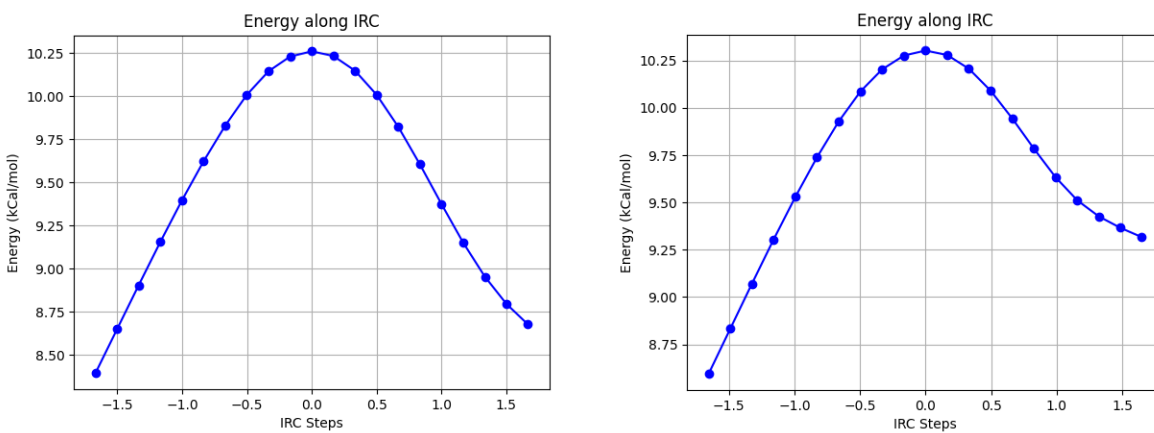

**Figure S-8:** IRC trajectories (in  $\text{CH}_2\text{Cl}_2$ ) calculated from TS-4 (left) and TS-5 (right).

#### 4. Results of QTAIM Analysis of $\pi$ -MV-dimers

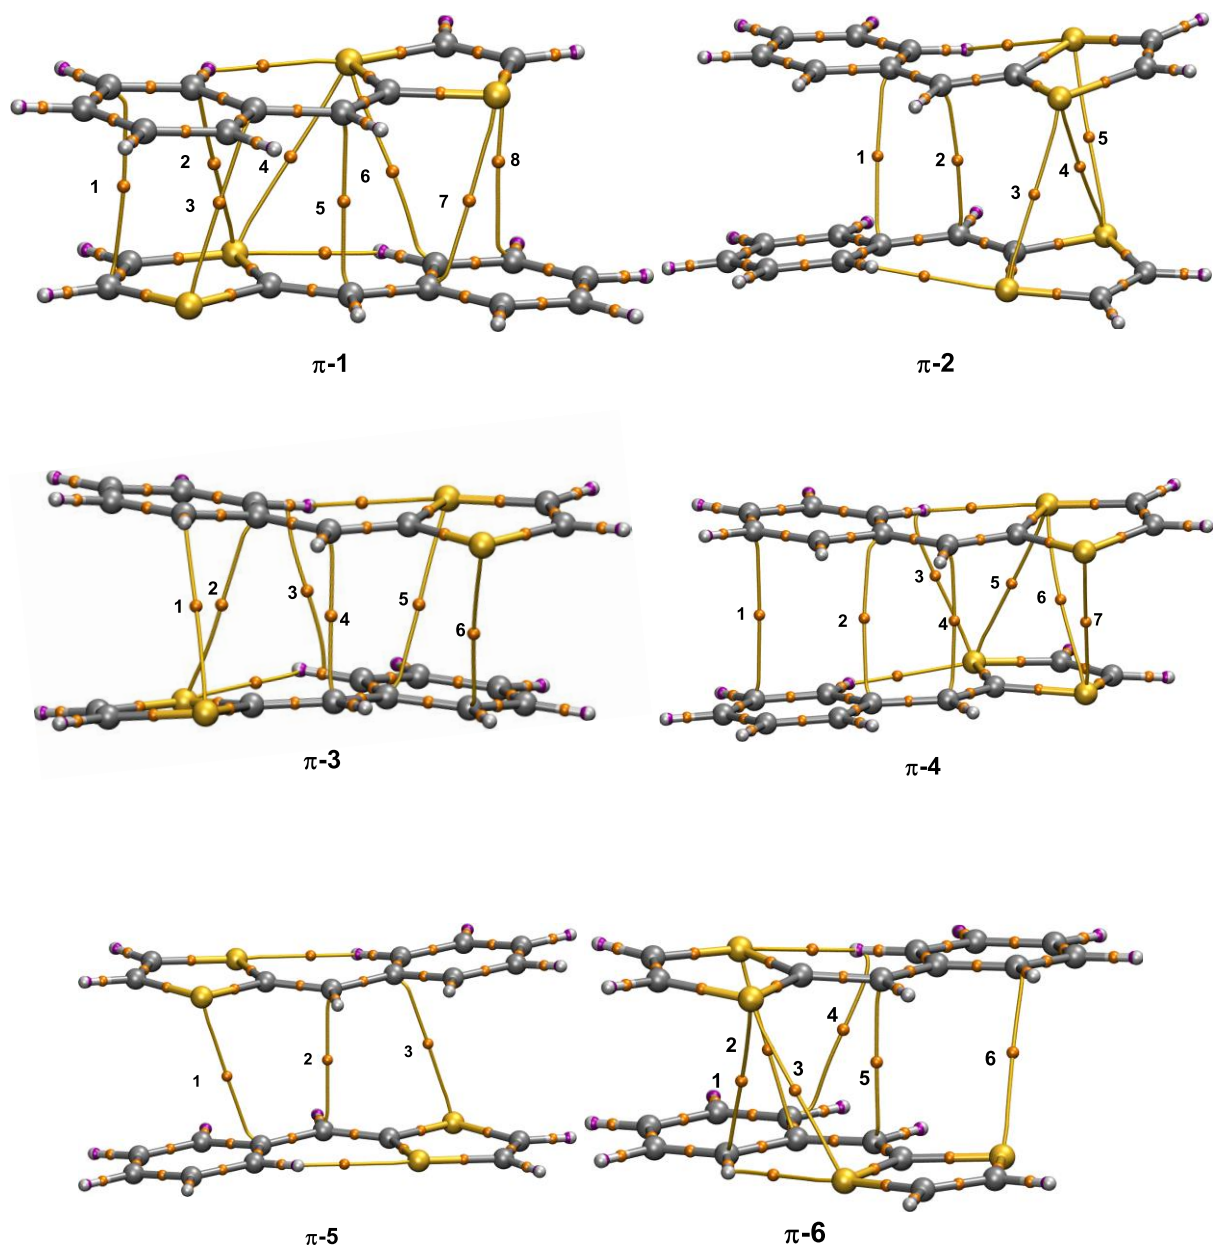

**Figure S-9:** QTAIM diagrams of the  $\pi$ -MV-dimers (in vacuo) with the intermolecular bond paths (orange lines) and (3,-1) critical points (orange spheres) highlighted.

**Table S-1** Summary of the properties of (3,-1) critical points obtained from the QTAIM analysis of  $\pi$ -1

| CP | Connected atoms | $\rho(r)$ | $s(r)$    | $G(r)$   | $V(r)$   | $E(r)$   | $\Delta^2\rho(r)$ |
|----|-----------------|-----------|-----------|----------|----------|----------|-------------------|
| 1  | C-C             | 0.006561  | -3.68E-05 | 0.003667 | -0.00305 | 0.000617 | 0.017138          |
| 2  | C-S             | 0.006524  | -5.48E-05 | 0.003856 | -0.00322 | 0.000633 | 0.017954          |
| 3  | C-S             | 0.00986   | -6.26E-05 | 0.00587  | -0.0052  | 0.00067  | 0.026159          |
| 4  | S-S             | 0.009139  | -3.90E-05 | 0.004703 | -0.00465 | 4.90E-05 | 0.019007          |
| 5  | C-C*            | 0.011113  | -0.0003   | 0.005429 | -0.00446 | 0.000971 | 0.025602          |
| 6  | C-S             | 0.006524  | -5.48E-05 | 0.003856 | -0.00322 | 0.000633 | 0.017955          |
| 7  | C-S             | 0.00986   | -6.26E-05 | 0.00587  | -0.0052  | 0.00067  | 0.026158          |
| 8  | C-C             | 0.006559  | -3.69E-05 | 0.003667 | -0.00305 | 0.000617 | 0.017134          |

$\rho(r)$  = Total electron density ,  $s(r)$  = spin density,  $G(r)$  = Lagrangian kinetic energy Potential energy density  $V(r)$ , Energy density  $E(r)$ , Laplacian of electron density  $\Delta^2\rho(r)$ .  $\rho$  in (a.u.). C-C\* represents the C-C bond formed after dimerization.

**Table S-2** Summary of the properties of critical points (CPs) obtained from the QTAIM analysis of  $\pi$ -2

| CP | Connected atoms | $\rho(r)$ | $s(r)$    | $G(r)$   | $V(r)$   | $E(r)$    | $\Delta^2\rho(r)$ |
|----|-----------------|-----------|-----------|----------|----------|-----------|-------------------|
| 1  | C-C             | 0.00827   | -9.37E-05 | 0.005152 | -0.00415 | 0.001003  | 0.024621          |
| 2  | C-C*            | 0.013198  | -0.00038  | 0.006881 | -0.00567 | 0.001207  | 0.032351          |
| 3  | S-S             | 0.009027  | -5.93E-05 | 0.004967 | -0.00495 | 1.83E-05  | 0.019942          |
| 4  | S-S             | 0.009027  | -5.93E-05 | 0.004967 | -0.00495 | 1.82E-05  | 0.019942          |
| 5  | S-S             | 0.010271  | -9.68E-05 | 0.005971 | -0.00603 | -6.22E-05 | 0.023636          |

$\rho(r)$  = Total electron density ,  $s(r)$  = spin density,  $G(r)$  = Lagrangian kinetic energy Potential energy density  $V(r)$ , Energy density  $E(r)$ , Laplacian of electron density  $\Delta^2\rho(r)$ .  $\rho$  in (a.u.). C-C\* represents the C-C bond formed after dimerization.

**Table S-3** Summary of the properties of critical points (CPs) obtained from the QTAIM analysis of  $\pi$ -3

| CP | Connected atoms | $\rho(r)$ | $s(r)$    | $G(r)$   | $V(r)$   | $E(r)$   | $\Delta^2\rho(r)$ |
|----|-----------------|-----------|-----------|----------|----------|----------|-------------------|
| 1  | C-S             | 0.006889  | -4.12E-05 | 0.004151 | -0.00342 | 0.000729 | 0.019522          |
| 2  | C-S             | 0.008675  | -6.41E-05 | 0.005319 | -0.00473 | 0.000587 | 0.023623          |
| 3  | C-C             | 0.005179  | -1.69E-05 | 0.003168 | -0.00198 | 0.001192 | 0.01744           |
| 4  | C-C*            | 0.015791  | -0.00075  | 0.008199 | -0.007   | 0.001198 | 0.037587          |
| 5  | C-S             | 0.008673  | -6.41E-05 | 0.005318 | -0.00473 | 0.000587 | 0.023618          |
| 6  | C-S             | 0.006887  | -4.12E-05 | 0.004149 | -0.00342 | 0.000729 | 0.019515          |

$\rho(r)$  = Total electron density ,  $s(r)$  = spin density,  $G(r)$  = Lagrangian kinetic energy Potential energy density  $V(r)$ , Energy density  $E(r)$ , Laplacian of electron density  $\Delta^2\rho(r)$ .  $\rho$  in (a.u.). C-C\* represents the C-C bond formed after dimerization.

**Table S-4** Summary of the properties of critical points (CPs) obtained from the QTAIM analysis of  $\pi$ -4

| CP | Connected atoms | $\rho(r)$ | $s(r)$    | $G(r)$   | $V(r)$   | $E(r)$    | $\Delta^2\rho(r)$ |
|----|-----------------|-----------|-----------|----------|----------|-----------|-------------------|
| 1  | C-C             | 0.006365  | -7.76E-05 | 0.003397 | -0.00281 | 0.000591  | 0.01595           |
| 2  | C-C             | 0.008316  | -8.06E-05 | 0.004966 | -0.00398 | 0.000981  | 0.023787          |
| 3  | C-S             | 0.007039  | 1.47E-05  | 0.004361 | -0.0034  | 0.000958  | 0.021275          |
| 4  | C-C*            | 0.012083  | -0.00034  | 0.006168 | -0.00506 | 0.001109  | 0.029109          |
| 5  | S-S             | 0.009206  | -5.98E-05 | 0.005048 | -0.00506 | -1.46E-05 | 0.020133          |
| 6  | S-S             | 0.008293  | -6.99E-05 | 0.005143 | -0.00503 | 0.000111  | 0.021018          |
| 7  | S-S             | 0.011041  | -0.0001   | 0.005923 | -0.006   | -7.72E-05 | 0.023385          |

$\rho(r)$  = Total electron density ,  $s(r)$  = spin density,  $G(r)$  = Lagrangian kinetic energy Potential energy density  $V(r)$ , Energy density  $E(r)$ , Laplacian of electron density  $\Delta^2\rho(r)$ .  $\rho$  in (a.u.). C-C\* represents the C-C bond formed after dimerization.

**Table S-5** Summary of the properties of critical points (CPs) obtained from the QTAIM analysis of  $\pi$ -5

| CP | Connected atoms | $\rho(r)$ | $s(r)$    | $G(r)$   | $V(r)$    | $E(r)$   | $\Delta^2\rho(r)$ |
|----|-----------------|-----------|-----------|----------|-----------|----------|-------------------|
| 1  | C-S             | 1.04E-02  | -6.65E-05 | 6.32E-03 | -5.62E-03 | 6.99E-04 | 2.81E-02          |
| 2  | C-C*            | 1.42E-02  | -5.94E-04 | 7.23E-03 | -6.02E-03 | 1.21E-03 | 3.37E-02          |
| 3  | C-S             | 1.04E-02  | -6.65E-05 | 6.32E-03 | -5.62E-03 | 6.99E-04 | 2.81E-02          |

$\rho(r)$  = Total electron density ,  $s(r)$  = spin density,  $G(r)$  = Lagrangian kinetic energy Potential energy density  $V(r)$ , Energy density  $E(r)$ , Laplacian of electron density  $\Delta^2\rho(r)$ .  $\rho$  in (a.u.). C-C\* represents the C-C bond formed after dimerization.

**Table S-6** Summary of the properties of critical points (CPs) obtained from the QTAIM analysis of  $\pi$ -6

| CP | Connected atoms | $\rho(r)$ | $s(r)$    | $G(r)$   | $V(r)$   | $E(r)$    | $\Delta^2\rho(r)$ |
|----|-----------------|-----------|-----------|----------|----------|-----------|-------------------|
| 1  | C-S             | 0.006443  | -6.42E-05 | 0.003764 | -0.00321 | 0.000556  | 0.017279          |
| 2  | C-S             | 0.009099  | -5.66E-05 | 0.005439 | -0.00486 | 0.000578  | 0.024067          |
| 3  | S-S             | 0.010725  | -6.52E-05 | 0.005452 | -0.00547 | -1.85E-05 | 0.021732          |
| 4  | C-H             | 0.004323  | -9.57E-07 | 0.002622 | -0.00166 | 0.000963  | 0.014339          |
| 5  | C-C*            | 0.01333   | -0.00028  | 0.00733  | -0.00589 | 0.001443  | 0.035092          |
| 6  | C-S             | 0.007196  | 7.06E-06  | 0.004296 | -0.00333 | 0.000964  | 0.021038          |

$\rho(r)$  = Total electron density ,  $s(r)$  = spin density,  $G(r)$  = Lagrangian kinetic energy Potential energy density  $V(r)$ , Energy density  $E(r)$ , Laplacian of electron density  $\Delta^2\rho(r)$ .  $\rho$  in (a.u.). C-C\* represents the C-C bond formed after dimerization.





## 5. Results of Spin Density Analysis

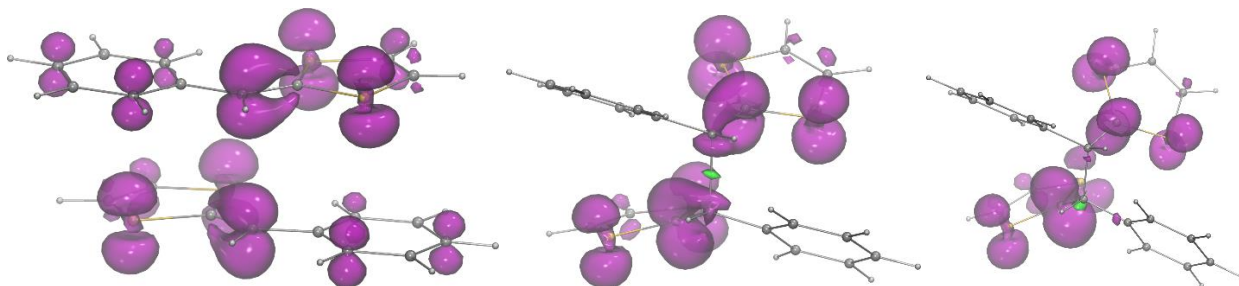

**Figure S-10:** Spin density plots of  $\pi$ -1 (left), TS-1 (middle), and  $\sigma$ -1 (right). Isovalue of 0.003 a.u.

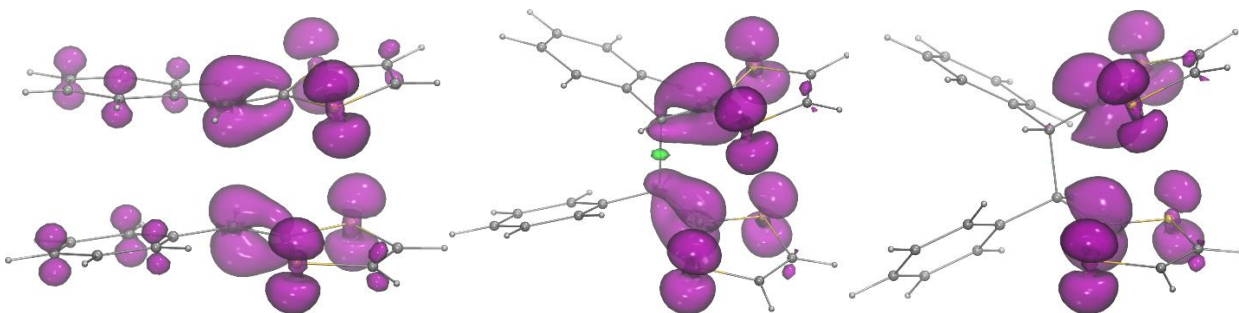

**Figure S-11:** Spin density plots of  $\pi$ -2 (left), TS-2 (middle), and  $\sigma$ -2 (right). Isovalue of 0.003 a.u.

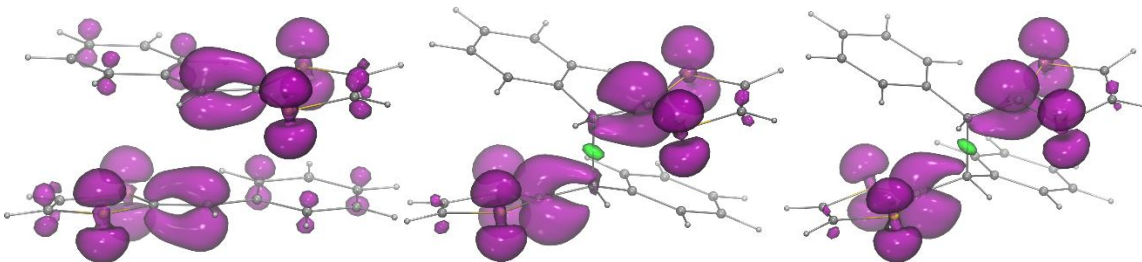

**Figure S-12:** Spin density plots of  $\pi$ -3 (left), TS-3 (middle), and  $\sigma$ -3 (right). Isovalue of 0.003 a.u.

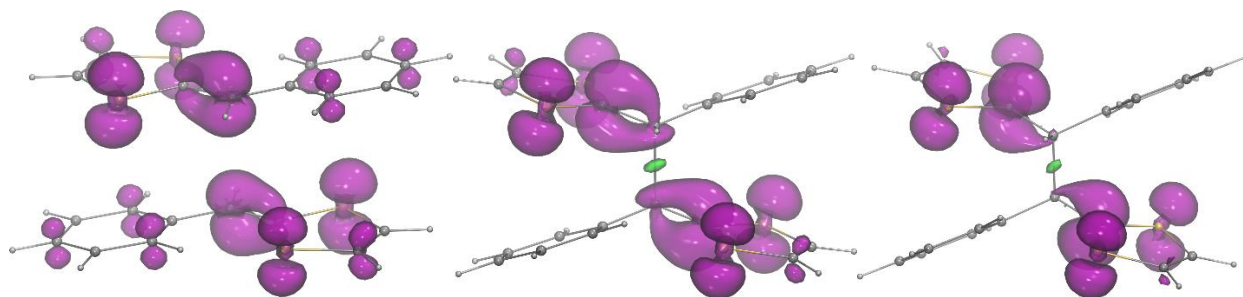

**Figure S-13:** Spin density plots of  $\pi$ -4 (left), TS-4 (middle), and  $\sigma$ -4 (right). Isovalue of 0.003 a.u.

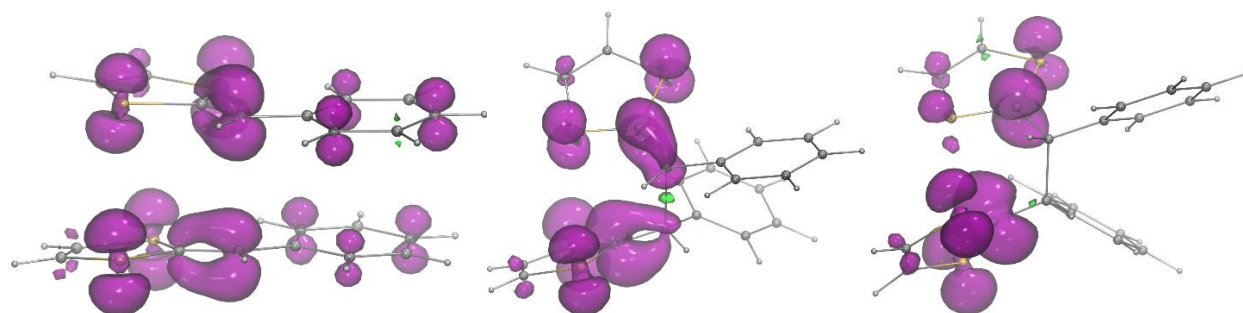

**Figure S-14:** Spin density plots of  $\pi$ -5 (left), TS-5 (middle), and  $\sigma$ -5 (right). Isovalue of 0.003 a.u.
